# Supplementary material
Source: PubMed Central journal article supplement (PMC3113616)
Supplement: supp_esr043_SupplementaryDataFile1.pdf [file supp_esr043_SupplementaryDataFile1.pdf]

Supplementary File 6

#agp file for ZAL2 and ZAL2m assemblies

#last column indicates orthologous start-stop position on TGU2 (chr2 taeGut1), breakpoints indicated by bp location in assembly

#ZAL2

|    |          |     |          |                       |         |         |    |            |            |          |        |                                 |
|----|----------|-----|----------|-----------------------|---------|---------|----|------------|------------|----------|--------|---------------------------------|
| gb | DP001173 | gnl | NISC-CON | sparrow_T213_21       | 1086    | 1       | D  | AC235706.2 | 160239     | 161324   | -      | 109.4 Mb                        |
| gb | DP001173 | gnl | NISC-CON | sparrow_T213_21087    | 1186    | 2       | N  | 100        | fragment   |          | yes    |                                 |
| gb | DP001173 | gnl | NISC-CON | sparrow_T213_21187    | 19433   | 3       | D  | AC235706.2 | 141892     | 160138   | -      |                                 |
| gb | DP001173 | gnl | NISC-CON | sparrow_T213_219434   | 19533   | 4       | N  | 100        | fragment   |          | yes    |                                 |
| gb | DP001173 | gnl | NISC-CON | sparrow_T213_219534   | 71078   | 5       | D  | AC235706.2 | 90247      | 141791   | -      |                                 |
| gb | DP001173 | gnl | NISC-CON | sparrow_T213_271079   | 71178   | 6       | N  | 100        | fragment   |          | yes    |                                 |
| gb | DP001173 | gnl | NISC-CON | sparrow_T213_271179   | 111162  | 7       | D  | AC235706.2 | 50163      | 90146    | -      |                                 |
| gb | DP001173 | gnl | NISC-CON | sparrow_T213_2111163  | 111262  | 8       | N  | 100        | fragment   |          | yes    |                                 |
| gb | DP001173 | gnl | NISC-CON | sparrow_T213_2111263  | 113420  | 9       | D  | AC235706.2 | 47905      | 50062    | -      |                                 |
| gb | DP001173 | gnl | NISC-CON | sparrow_T213_2113421  | 113520  | 10      | N  | 100        | fragment   |          | yes    |                                 |
| gb | DP001173 | gnl | NISC-CON | sparrow_T213_2113521  | 149520  | 11      | D  | AC235706.2 | 11805      | 47804    | -      |                                 |
| gb | DP001173 | gnl | NISC-CON | sparrow_T213_2149521  | 149620  | 12      | N  | 100        | fragment   |          | yes    |                                 |
| gb | DP001173 | gnl | NISC-CON | sparrow_T213_2149621  | 161324  | 13      | D  | AC235706.2 | 1          | 11704    | -      | 109.3 Mb                        |
| gb | DP001173 | gnl | NISC-CON | sparrow_T213_2161325  | 211324  | 14      | N  | 50000      | clone      | yes      |        |                                 |
| gb | DP001173 | gnl | NISC-CON | sparrow_T213_2211325  | 333969  | 15      | D  | AC235520.2 | 38004      | 160648   | -      | 109.2 Mb                        |
| gb | DP001173 | gnl | NISC-CON | sparrow_T213_2333970  | 333993  | 16      | D  | AC235939.2 | 135765     | 135788   | -      |                                 |
| gb | DP001173 | gnl | NISC-CON | sparrow_T213_2333994  | 334093  | 17      | N  | 100        | fragment   |          | yes    |                                 |
| gb | DP001173 | gnl | NISC-CON | sparrow_T213_2334094  | 394781  | 18      | D  | AC235939.2 | 74977      | 135664   | -      |                                 |
| gb | DP001173 | gnl | NISC-CON | sparrow_T213_2394782  | 394881  | 19      | N  | 100        | fragment   |          | yes    |                                 |
| gb | DP001173 | gnl | NISC-CON | sparrow_T213_2394882  | 469757  | 20      | D  | AC235939.2 | 1          | 74876    | -      | 108.9 Mb                        |
| gb | DP001173 | gnl | NISC-CON | sparrow_T213_2469758  | 519757  | 21      | N  | 50000      | clone      | yes      |        |                                 |
| gb | DP001173 | gnl | NISC-CON | sparrow_T213_2519758  | 621777  | 22      | D  | AC236859.2 | 49427      | 151446   | -      | 108.9 Mb                        |
| gb | DP001173 | gnl | NISC-CON | sparrow_T213_2621778  | 621877  | 23      | N  | 100        | fragment   |          | yes    |                                 |
| gb | DP001173 | gnl | NISC-CON | sparrow_T213_2621878  | 671203  | 24      | D  | AC236859.2 | 1          | 49326    | -      |                                 |
| gb | DP001173 | gnl | NISC-CON | sparrow_T213_2671204  | 707118  | 25      | D  | AC235937.2 | 103639     | 139553   | -      |                                 |
| gb | DP001173 | gnl | NISC-CON | sparrow_T213_2707119  | 707218  | 26      | N  | 100        | fragment   |          | yes    |                                 |
| gb | DP001173 | gnl | NISC-CON | sparrow_T213_2707219  | 810756  | 27      | D  | AC235937.2 | 1          | 103538   | -      |                                 |
| gb | DP001173 | gnl | NISC-CON | sparrow_T213_2810757  | 934140  | 28      | D  | AC236466.2 | 29888      | 153271   | -      |                                 |
| gb | DP001173 | gnl | NISC-CON | sparrow_T213_2934141  | 1039314 | 29      | D  | AC236053.2 | 33591      | 138764   | -      |                                 |
| gb | DP001173 | gnl | NISC-CON | sparrow_T213_21039315 |         | 1039414 | 30 | N          | 100        | fragment |        | yes                             |
| gb | DP001173 | gnl | NISC-CON | sparrow_T213_21039415 |         | 1043229 | 31 | D          | AC236053.2 | 29676    | 33490  | -                               |
| gb | DP001173 | gnl | NISC-CON | sparrow_T213_21043230 |         | 1043329 | 32 | N          | 100        | fragment |        | yes                             |
| gb | DP001173 | gnl | NISC-CON | sparrow_T213_21043330 |         | 1072904 | 33 | D          | AC236053.2 | 1        | 29575  | -                               |
| gb | DP001173 | gnl | NISC-CON | sparrow_T213_21072905 |         | 1076028 | 34 | D          | AC237009.3 | 121689   | 124812 | -                               |
| gb | DP001173 | gnl | NISC-CON | sparrow_T213_21076029 |         | 1247552 | 35 | N          | 100        | fragment |        | yes                             |
| gb | DP001173 | gnl | NISC-CON | sparrow_T213_21076129 |         | 1178823 | 36 | D          | AC237009.3 | 18894    | 121588 | -                               |
| gb | DP001173 | gnl | NISC-CON | sparrow_T213_21178824 |         | 1193623 | 37 | D          | AC237009.3 | 3181     | 17980  | -                               |
| Mb |          |     |          |                       |         |         |    |            |            |          |        | 108.3 Mb, 1188576^1188577, 70.3 |
| gb | DP001173 | gnl | NISC-CON | sparrow_T213_21193624 |         | 1193723 | 38 | N          | 100        | fragment |        | yes                             |
| gb | DP001173 | gnl | NISC-CON | sparrow_T213_21193724 |         | 1196803 | 39 | D          | AC237009.3 | 1        | 3080   | -                               |
| gb | DP001173 | gnl | NISC-CON | sparrow_T213_21196804 |         | 1246803 | 40 | N          | 50000      | clone    | yes    |                                 |
| gb | DP001173 | gnl | NISC-CON | sparrow_T213_21246804 |         | 1247452 | 41 | D          | AC239425.2 | 1        | 649    | +                               |
| gb | DP001173 | gnl | NISC-CON | sparrow_T213_21247453 |         | 1247552 | 42 | N          | 100        | fragment |        | yes                             |
| gb | DP001173 | gnl | NISC-CON | sparrow_T213_21247553 |         | 1250670 | 43 | D          | AC239425.2 | 750      | 3867   | +                               |
| gb | DP001173 | gnl | NISC-CON | sparrow_T213_21250671 |         | 1250770 | 44 | N          | 100        | fragment |        | yes                             |
| gb | DP001173 | gnl | NISC-CON | sparrow_T213_21250771 |         | 1280924 | 45 | D          | AC239425.2 | 3968     | 34121  | +                               |

|    |          |     |          |                       |         |    |   |            |          |        |   |         |
|----|----------|-----|----------|-----------------------|---------|----|---|------------|----------|--------|---|---------|
| gb | DP001173 | gnl | NISC-CON | sparrow_T213_21280925 | 1281024 | 46 | N | 100        | fragment | yes    |   |         |
| gb | DP001173 | gnl | NISC-CON | sparrow_T213_21281025 | 1314705 | 47 | D | AC239425.2 | 34222    | 67902  | + |         |
| gb | DP001173 | gnl | NISC-CON | sparrow_T213_21314706 | 1314805 | 48 | N | 100        | fragment | yes    |   |         |
| gb | DP001173 | gnl | NISC-CON | sparrow_T213_21314806 | 1322658 | 49 | D | AC239425.2 | 68003    | 75855  | + |         |
| gb | DP001173 | gnl | NISC-CON | sparrow_T213_21322659 | 1322758 | 50 | N | 100        | fragment | yes    |   |         |
| gb | DP001173 | gnl | NISC-CON | sparrow_T213_21322759 | 1332090 | 51 | D | AC239425.2 | 75956    | 85287  | + |         |
| gb | DP001173 | gnl | NISC-CON | sparrow_T213_21332091 | 1332190 | 52 | N | 100        | fragment | yes    |   |         |
| gb | DP001173 | gnl | NISC-CON | sparrow_T213_21332191 | 1371164 | 53 | D | AC239425.2 | 85388    | 124361 | + |         |
| gb | DP001173 | gnl | NISC-CON | sparrow_T213_21371165 | 1371264 | 54 | N | 100        | fragment | yes    |   |         |
| gb | DP001173 | gnl | NISC-CON | sparrow_T213_21371265 | 1393860 | 55 | D | AC239425.2 | 124462   | 147057 | + | 70.4 Mb |
| gb | DP001173 | gnl | NISC-CON | sparrow_T213_21393861 | 1443860 | 56 | N | 50000      | clone    | yes    |   |         |
| gb | DP001173 | gnl | NISC-CON | sparrow_T213_21443861 | 1542799 | 57 | D | AC236558.2 | 1        | 98939  | + | 70.4 Mb |
| gb | DP001173 | gnl | NISC-CON | sparrow_T213_21542800 | 1542899 | 58 | N | 100        | fragment | yes    |   |         |
| gb | DP001173 | gnl | NISC-CON | sparrow_T213_21542900 | 1546117 | 59 | D | AC236558.2 | 99040    | 102257 | + |         |
| gb | DP001173 | gnl | NISC-CON | sparrow_T213_21546118 | 1546217 | 60 | N | 100        | fragment | yes    |   |         |
| gb | DP001173 | gnl | NISC-CON | sparrow_T213_21546218 | 1576516 | 61 | D | AC236558.2 | 102358   | 132656 | + |         |
| gb | DP001173 | gnl | NISC-CON | sparrow_T213_21576517 | 1670282 | 62 | D | AC236467.2 | 1        | 93766  | + |         |
| gb | DP001173 | gnl | NISC-CON | sparrow_T213_21670283 | 1670382 | 63 | N | 100        | fragment | yes    |   |         |
| gb | DP001173 | gnl | NISC-CON | sparrow_T213_21670383 | 1706662 | 64 | D | AC236467.2 | 93867    | 130146 | + |         |
| gb | DP001173 | gnl | NISC-CON | sparrow_T213_21706663 | 1706762 | 65 | N | 100        | fragment | yes    |   |         |
| gb | DP001173 | gnl | NISC-CON | sparrow_T213_21706763 | 1728746 | 66 | D | AC236467.2 | 130247   | 152230 | + | 70.7 Mb |
| gb | DP001173 | gnl | NISC-CON | sparrow_T213_21728747 | 1778746 | 67 | N | 50000      | clone    | yes    |   |         |
| gb | DP001173 | gnl | NISC-CON | sparrow_T213_21778747 | 1779222 | 68 | D | AC236090.2 | 1        | 476    | + | 70.8 Mb |
| gb | DP001173 | gnl | NISC-CON | sparrow_T213_21779223 | 1779322 | 69 | N | 100        | fragment | yes    |   |         |
| gb | DP001173 | gnl | NISC-CON | sparrow_T213_21779323 | 1831792 | 70 | D | AC236090.2 | 577      | 53046  | + |         |
| gb | DP001173 | gnl | NISC-CON | sparrow_T213_21831793 | 1831892 | 71 | N | 100        | fragment | yes    |   |         |
| gb | DP001173 | gnl | NISC-CON | sparrow_T213_21831893 | 1875053 | 72 | D | AC236090.2 | 53147    | 96307  | + |         |
| gb | DP001173 | gnl | NISC-CON | sparrow_T213_21875054 | 1875153 | 73 | N | 100        | fragment | yes    |   |         |
| gb | DP001173 | gnl | NISC-CON | sparrow_T213_21875154 | 1924714 | 74 | D | AC236090.2 | 96408    | 145968 | + | 70.9 Mb |
| gb | DP001173 | gnl | NISC-CON | sparrow_T213_21924715 | 1974714 | 75 | N | 50000      | clone    | yes    |   |         |
| gb | DP001173 | gnl | NISC-CON | sparrow_T213_21974715 | 1979797 | 76 | D | AC235778.2 | 1        | 5083   | + | 71.0 Mb |
| gb | DP001173 | gnl | NISC-CON | sparrow_T213_21979798 | 1979897 | 77 | N | 100        | fragment | yes    |   |         |
| gb | DP001173 | gnl | NISC-CON | sparrow_T213_21979898 | 1991219 | 78 | D | AC235778.2 | 5184     | 16505  | + |         |
| gb | DP001173 | gnl | NISC-CON | sparrow_T213_21991220 | 1991319 | 79 | N | 100        | fragment | yes    |   |         |
| gb | DP001173 | gnl | NISC-CON | sparrow_T213_21991320 | 2043082 | 80 | D | AC235778.2 | 16606    | 68368  | + |         |
| gb | DP001173 | gnl | NISC-CON | sparrow_T213_22043083 | 2043182 | 81 | N | 100        | fragment | yes    |   |         |
| gb | DP001173 | gnl | NISC-CON | sparrow_T213_22043183 | 2046405 | 82 | D | AC235778.2 | 68469    | 71691  | + |         |
| gb | DP001173 | gnl | NISC-CON | sparrow_T213_22046406 | 2046505 | 83 | N | 100        | fragment | yes    |   |         |
| gb | DP001173 | gnl | NISC-CON | sparrow_T213_22046506 | 2061370 | 84 | D | AC235778.2 | 71792    | 86656  | + |         |
| gb | DP001173 | gnl | NISC-CON | sparrow_T213_22061371 | 2061470 | 85 | N | 100        | fragment | yes    |   |         |
| gb | DP001173 | gnl | NISC-CON | sparrow_T213_22061471 | 2076986 | 86 | D | AC235778.2 | 86757    | 102272 | + |         |
| gb | DP001173 | gnl | NISC-CON | sparrow_T213_22076987 | 2077086 | 87 | N | 100        | fragment | yes    |   |         |
| gb | DP001173 | gnl | NISC-CON | sparrow_T213_22077087 | 2087714 | 88 | D | AC235778.2 | 102373   | 113000 | + |         |
| gb | DP001173 | gnl | NISC-CON | sparrow_T213_22087715 | 2113739 | 89 | D | AC235718.2 | 1        | 26025  | + |         |
| gb | DP001173 | gnl | NISC-CON | sparrow_T213_22113740 | 2113839 | 90 | N | 100        | fragment | yes    |   |         |
| gb | DP001173 | gnl | NISC-CON | sparrow_T213_22113840 | 2116770 | 91 | D | AC235718.2 | 26126    | 29056  | + |         |
| gb | DP001173 | gnl | NISC-CON | sparrow_T213_22116771 | 2116870 | 92 | N | 100        | fragment | yes    |   |         |
| gb | DP001173 | gnl | NISC-CON | sparrow_T213_22116871 | 2160212 | 93 | D | AC235718.2 | 29157    | 72498  | + |         |
| gb | DP001173 | gnl | NISC-CON | sparrow_T213_22160213 | 2160312 | 94 | N | 100        | fragment | yes    |   |         |
| gb | DP001173 | gnl | NISC-CON | sparrow_T213_22160313 | 2162582 | 95 | D | AC235718.2 | 72599    | 74868  | + |         |
| gb | DP001173 | gnl | NISC-CON | sparrow_T213_22162583 | 2162682 | 96 | N | 100        | fragment | yes    |   |         |

|    |          |     |          |                       |         |     |   |            |          |        |   |                                |
|----|----------|-----|----------|-----------------------|---------|-----|---|------------|----------|--------|---|--------------------------------|
| gb | DP001173 | gnl | NISC-CON | sparrow_T213_22162683 | 2170064 | 97  | D | AC235718.2 | 74969    | 82350  | + |                                |
| gb | DP001173 | gnl | NISC-CON | sparrow_T213_22170065 | 2170164 | 98  | N | 100        | fragment | yes    |   |                                |
| gb | DP001173 | gnl | NISC-CON | sparrow_T213_22170165 | 2217667 | 99  | D | AC235718.2 | 82451    | 129953 | + |                                |
| gb | DP001173 | gnl | NISC-CON | sparrow_T213_22217668 | 2217767 | 100 | N | 100        | fragment | yes    |   |                                |
| gb | DP001173 | gnl | NISC-CON | sparrow_T213_22217768 | 2239758 | 101 | D | AC235718.2 | 130054   | 152044 | + |                                |
| gb | DP001173 | gnl | NISC-CON | sparrow_T213_22239759 | 2239858 | 102 | N | 100        | fragment | yes    |   |                                |
| gb | DP001173 | gnl | NISC-CON | sparrow_T213_22239859 | 2251238 | 103 | D | AC235718.2 | 152145   | 163524 | + | 71.1 Mb                        |
| gb | DP001173 | gnl | NISC-CON | sparrow_T213_22251239 | 2301238 | 104 | N | 50000      | clone    | yes    |   |                                |
| gb | DP001173 | gnl | NISC-CON | sparrow_T213_22301239 | 2308200 | 105 | D | AC235712.2 | 1        | 6962   | + | 71.3                           |
| gb | DP001173 | gnl | NISC-CON | sparrow_T213_22308201 | 2308300 | 106 | N | 100        | fragment | yes    |   |                                |
| gb | DP001173 | gnl | NISC-CON | sparrow_T213_22308301 | 2314858 | 107 | D | AC235712.2 | 7063     | 13620  | + |                                |
| gb | DP001173 | gnl | NISC-CON | sparrow_T213_22314859 | 2314958 | 108 | N | 100        | fragment | yes    |   |                                |
| gb | DP001173 | gnl | NISC-CON | sparrow_T213_22314959 | 2328298 | 109 | D | AC235712.2 | 13721    | 27060  | + |                                |
| gb | DP001173 | gnl | NISC-CON | sparrow_T213_22328299 | 2328398 | 110 | N | 100        | fragment | yes    |   |                                |
| gb | DP001173 | gnl | NISC-CON | sparrow_T213_22328399 | 2336392 | 111 | D | AC235712.2 | 27161    | 35154  | + |                                |
| gb | DP001173 | gnl | NISC-CON | sparrow_T213_22336393 | 2336492 | 112 | N | 100        | fragment | yes    |   |                                |
| gb | DP001173 | gnl | NISC-CON | sparrow_T213_22336493 | 2338536 | 113 | D | AC235712.2 | 35255    | 37298  | + |                                |
| gb | DP001173 | gnl | NISC-CON | sparrow_T213_22338537 | 2338636 | 114 | N | 100        | fragment | yes    |   |                                |
| gb | DP001173 | gnl | NISC-CON | sparrow_T213_22338637 | 2340931 | 115 | D | AC235712.2 | 37399    | 39693  | + |                                |
| gb | DP001173 | gnl | NISC-CON | sparrow_T213_22340932 | 2341031 | 116 | N | 100        | fragment | yes    |   |                                |
| gb | DP001173 | gnl | NISC-CON | sparrow_T213_22341032 | 2409303 | 117 | D | AC235712.2 | 39794    | 108065 | + |                                |
| gb | DP001173 | gnl | NISC-CON | sparrow_T213_22409304 | 2409403 | 118 | N | 100        | fragment | yes    |   |                                |
| gb | DP001173 | gnl | NISC-CON | sparrow_T213_22409404 | 2447677 | 119 | D | AC235712.2 | 108166   | 146439 | + |                                |
| gb | DP001173 | gnl | NISC-CON | sparrow_T213_22447678 | 2486159 | 120 | D | AC235713.2 | 1        | 38482  | + |                                |
| gb | DP001173 | gnl | NISC-CON | sparrow_T213_22486160 | 2486259 | 121 | N | 100        | fragment | yes    |   |                                |
| gb | DP001173 | gnl | NISC-CON | sparrow_T213_22486260 | 2517923 | 122 | D | AC235713.2 | 38583    | 70246  | + | 71.5 Mb, 2476162..2492982,24.1 |
| Mb |          |     |          |                       |         |     |   |            |          |        |   |                                |
| gb | DP001173 | gnl | NISC-CON | sparrow_T213_22517924 | 2639152 | 123 | D | AC235935.2 | 1        | 121229 | + |                                |
| gb | DP001173 | gnl | NISC-CON | sparrow_T213_22639153 | 2639252 | 124 | N | 100        | fragment | yes    |   |                                |
| gb | DP001173 | gnl | NISC-CON | sparrow_T213_22639253 | 2649137 | 125 | D | AC235935.2 | 121330   | 131214 | + |                                |
| gb | DP001173 | gnl | NISC-CON | sparrow_T213_22649138 | 2755485 | 126 | D | AC236050.2 | 1        | 106348 | + |                                |
| gb | DP001173 | gnl | NISC-CON | sparrow_T213_22755486 | 2876069 | 127 | D | AC236552.2 | 8822     | 129405 | + |                                |
| gb | DP001173 | gnl | NISC-CON | sparrow_T213_22876070 | 2876169 | 128 | N | 100        | fragment | yes    |   |                                |
| gb | DP001173 | gnl | NISC-CON | sparrow_T213_22876170 | 2901652 | 129 | D | AC236552.2 | 129506   | 154988 | + | 24.5 Mb                        |
| gb | DP001173 | gnl | NISC-CON | sparrow_T213_22901653 | 2951652 | 130 | N | 50000      | clone    | yes    |   |                                |
| gb | DP001173 | gnl | NISC-CON | sparrow_T213_22951653 | 3056487 | 131 | D | AC235941.2 | 1        | 104835 | + | 27.9 Mb                        |
| gb | DP001173 | gnl | NISC-CON | sparrow_T213_23056488 | 3056587 | 132 | N | 100        | fragment | yes    |   |                                |
| gb | DP001173 | gnl | NISC-CON | sparrow_T213_23056588 | 3096589 | 133 | D | AC235941.2 | 104936   | 144937 | + |                                |
| gb | DP001173 | gnl | NISC-CON | sparrow_T213_23096590 | 3109486 | 134 | D | AC237120.2 | 12112    | 25008  | + |                                |
| gb | DP001173 | gnl | NISC-CON | sparrow_T213_23109487 | 3109586 | 135 | N | 100        | fragment | yes    |   |                                |
| gb | DP001173 | gnl | NISC-CON | sparrow_T213_23109587 | 3182045 | 136 | D | AC237120.2 | 25109    | 97567  | + |                                |
| gb | DP001173 | gnl | NISC-CON | sparrow_T213_23182046 | 3292912 | 137 | D | AC236251.2 | 1445     | 112311 | + |                                |
| gb | DP001173 | gnl | NISC-CON | sparrow_T213_23292913 | 3293012 | 138 | N | 100        | fragment | yes    |   |                                |
| gb | DP001173 | gnl | NISC-CON | sparrow_T213_23293013 | 3320217 | 139 | D | AC236251.2 | 112412   | 149616 | + |                                |
| gb | DP001173 | gnl | NISC-CON | sparrow_T213_23330218 | 3330317 | 140 | N | 100        | fragment | yes    |   |                                |
| gb | DP001173 | gnl | NISC-CON | sparrow_T213_23330318 | 3338798 | 141 | D | AC236251.2 | 149717   | 158197 | + |                                |
| gb | DP001173 | gnl | NISC-CON | sparrow_T213_23338799 | 3338898 | 142 | N | 100        | fragment | yes    |   |                                |
| gb | DP001173 | gnl | NISC-CON | sparrow_T213_23338899 | 3340030 | 143 | D | AC236251.2 | 158298   | 159429 | + |                                |
| gb | DP001173 | gnl | NISC-CON | sparrow_T213_23340031 | 3343831 | 144 | D | AC236857.2 | 1        | 3801   | + |                                |
| gb | DP001173 | gnl | NISC-CON | sparrow_T213_23343832 | 3343931 | 145 | N | 100        | fragment | yes    |   |                                |
| gb | DP001173 | gnl | NISC-CON | sparrow_T213_23343932 | 3359028 | 146 | D | AC236857.2 | 3902     | 18998  | + |                                |

|    |          |     |          |                       |         |     |   |            |          |        |   |         |
|----|----------|-----|----------|-----------------------|---------|-----|---|------------|----------|--------|---|---------|
| gb | DP001173 | gnl | NISC-CON | sparrow_T213_23359029 | 3359128 | 147 | N | 100        | fragment | yes    |   |         |
| gb | DP001173 | gnl | NISC-CON | sparrow_T213_23359129 | 3380565 | 148 | D | AC236857.2 | 19099    | 40535  | + |         |
| gb | DP001173 | gnl | NISC-CON | sparrow_T213_23380566 | 3435991 | 149 | D | AC235775.2 | 1        | 55426  | + |         |
| gb | DP001173 | gnl | NISC-CON | sparrow_T213_23435992 | 3436091 | 150 | N | 100        | fragment | yes    |   |         |
| gb | DP001173 | gnl | NISC-CON | sparrow_T213_23436092 | 3436271 | 151 | D | AC236857.2 | 95855    | 96034  | + |         |
| gb | DP001173 | gnl | NISC-CON | sparrow_T213_23436272 | 3458584 | 152 | D | AC235775.2 | 55527    | 77839  | + |         |
| gb | DP001173 | gnl | NISC-CON | sparrow_T213_23458585 | 3458684 | 153 | N | 100        | fragment | yes    |   |         |
| gb | DP001173 | gnl | NISC-CON | sparrow_T213_23458685 | 3540730 | 154 | D | AC235775.2 | 77940    | 159985 | + |         |
| gb | DP001173 | gnl | NISC-CON | sparrow_T213_23540731 | 3540830 | 155 | N | 100        | fragment | yes    |   |         |
| gb | DP001173 | gnl | NISC-CON | sparrow_T213_23540831 | 3544863 | 156 | D | AC235775.2 | 160086   | 164118 | + | 28.5 Mb |
| gb | DP001173 | gnl | NISC-CON | sparrow_T213_23544864 | 3594863 | 157 | N | 50000      | clone    | yes    |   |         |
| gb | DP001173 | gnl | NISC-CON | sparrow_T213_23594864 | 3604048 | 158 | D | AC235519.2 | 146127   | 155311 | - | 21.9 Mb |
| gb | DP001173 | gnl | NISC-CON | sparrow_T213_23604049 | 3604148 | 159 | N | 100        | fragment | yes    |   |         |
| gb | DP001173 | gnl | NISC-CON | sparrow_T213_23604149 | 3639864 | 160 | D | AC235519.2 | 110311   | 146026 | - |         |
| gb | DP001173 | gnl | NISC-CON | sparrow_T213_23639865 | 3639964 | 161 | N | 100        | fragment | yes    |   |         |
| gb | DP001173 | gnl | NISC-CON | sparrow_T213_23639965 | 3666346 | 162 | D | AC235519.2 | 83829    | 110210 | - |         |
| gb | DP001173 | gnl | NISC-CON | sparrow_T213_23666347 | 3666446 | 163 | N | 100        | fragment | yes    |   |         |
| gb | DP001173 | gnl | NISC-CON | sparrow_T213_23666447 | 3668850 | 164 | D | AC235519.2 | 81325    | 83728  | - |         |
| gb | DP001173 | gnl | NISC-CON | sparrow_T213_23668851 | 3668950 | 165 | N | 100        | fragment | yes    |   |         |
| gb | DP001173 | gnl | NISC-CON | sparrow_T213_23668951 | 3696443 | 166 | D | AC235519.2 | 53732    | 81224  | - |         |
| gb | DP001173 | gnl | NISC-CON | sparrow_T213_23696444 | 3696543 | 167 | N | 100        | fragment | yes    |   |         |
| gb | DP001173 | gnl | NISC-CON | sparrow_T213_23696544 | 3699175 | 168 | D | AC235519.2 | 51000    | 53631  | - |         |
| gb | DP001173 | gnl | NISC-CON | sparrow_T213_23699176 | 3699275 | 169 | N | 100        | fragment | yes    |   |         |
| gb | DP001173 | gnl | NISC-CON | sparrow_T213_23699276 | 3750174 | 170 | D | AC235519.2 | 1        | 50899  | - |         |
| gb | DP001173 | gnl | NISC-CON | sparrow_T213_23750175 | 3768904 | 171 | D | AC235930.2 | 111680   | 130409 | - |         |
| gb | DP001173 | gnl | NISC-CON | sparrow_T213_23768905 | 3769004 | 172 | N | 100        | fragment | yes    |   |         |
| gb | DP001173 | gnl | NISC-CON | sparrow_T213_23769005 | 3842617 | 173 | D | AC235930.2 | 37967    | 111579 | - |         |
| gb | DP001173 | gnl | NISC-CON | sparrow_T213_23842618 | 3842717 | 174 | N | 100        | fragment | yes    |   |         |
| gb | DP001173 | gnl | NISC-CON | sparrow_T213_23842718 | 3861171 | 175 | D | AC235930.2 | 19413    | 37866  | - |         |
| gb | DP001173 | gnl | NISC-CON | sparrow_T213_23861172 | 3861271 | 176 | N | 100        | fragment | yes    |   |         |
| gb | DP001173 | gnl | NISC-CON | sparrow_T213_23861272 | 3880583 | 177 | D | AC235930.2 | 1        | 19312  | - | 21.6 Mb |
| gb | DP001173 | gnl | NISC-CON | sparrow_T213_23880584 | 3930583 | 178 | N | 50000      | clone    | yes    |   |         |
| gb | DP001173 | gnl | NISC-CON | sparrow_T213_23930584 | 3966369 | 179 | D | AC235524.2 | 1        | 35786  | + | 33.7 Mb |
| gb | DP001173 | gnl | NISC-CON | sparrow_T213_23966370 | 3966469 | 180 | N | 100        | fragment | yes    |   |         |
| gb | DP001173 | gnl | NISC-CON | sparrow_T213_23966470 | 4007726 | 181 | D | AC235524.2 | 35887    | 77143  | + |         |
| gb | DP001173 | gnl | NISC-CON | sparrow_T213_24007727 | 4007826 | 182 | N | 100        | fragment | yes    |   |         |
| gb | DP001173 | gnl | NISC-CON | sparrow_T213_24007827 | 4043753 | 183 | D | AC235524.2 | 77244    | 113170 | + |         |
| gb | DP001173 | gnl | NISC-CON | sparrow_T213_24043754 | 4043853 | 184 | N | 100        | fragment | yes    |   |         |
| gb | DP001173 | gnl | NISC-CON | sparrow_T213_24043854 | 4070294 | 185 | D | AC235524.2 | 113271   | 139711 | + |         |
| gb | DP001173 | gnl | NISC-CON | sparrow_T213_24070295 | 4070394 | 186 | N | 100        | fragment | yes    |   |         |
| gb | DP001173 | gnl | NISC-CON | sparrow_T213_24070395 | 4075224 | 187 | D | AC235524.2 | 139812   | 144641 | + | 33.9 Mb |
| gb | DP001173 | gnl | NISC-CON | sparrow_T213_24075225 | 4125224 | 188 | N | 50000      | clone    | yes    |   |         |
| gb | DP001173 | gnl | NISC-CON | sparrow_T213_24125225 | 4152995 | 189 | D | AC235926.2 | 1        | 27771  | + | 39.6 Mb |
| gb | DP001173 | gnl | NISC-CON | sparrow_T213_24152996 | 4153095 | 190 | N | 100        | fragment | yes    |   |         |
| gb | DP001173 | gnl | NISC-CON | sparrow_T213_24153096 | 4207169 | 191 | D | AC235926.2 | 27872    | 81945  | + |         |
| gb | DP001173 | gnl | NISC-CON | sparrow_T213_24207170 | 4207269 | 192 | N | 100        | fragment | yes    |   |         |
| gb | DP001173 | gnl | NISC-CON | sparrow_T213_24207270 | 4243871 | 193 | D | AC235926.2 | 82046    | 118647 | + |         |
| gb | DP001173 | gnl | NISC-CON | sparrow_T213_24243872 | 4243971 | 194 | N | 100        | fragment | yes    |   |         |
| gb | DP001173 | gnl | NISC-CON | sparrow_T213_24243972 | 4274914 | 195 | D | AC235926.2 | 118748   | 149690 | + |         |
| gb | DP001173 | gnl | NISC-CON | sparrow_T213_24274915 | 4306148 | 196 | D | AC235590.2 | 1        | 31234  | + |         |
| gb | DP001173 | gnl | NISC-CON | sparrow_T213_24306149 | 4306248 | 197 | N | 100        | fragment | yes    |   |         |

|    |          |     |          |                       |         |     |   |            |          |        |   |         |
|----|----------|-----|----------|-----------------------|---------|-----|---|------------|----------|--------|---|---------|
| gb | DP001173 | gnl | NISC-CON | sparrow_T213_24306249 | 4371156 | 198 | D | AC235590.2 | 31335    | 96242  | + |         |
| gb | DP001173 | gnl | NISC-CON | sparrow_T213_24371157 | 4371256 | 199 | N | 100        | fragment | yes    |   |         |
| gb | DP001173 | gnl | NISC-CON | sparrow_T213_24371257 | 4417750 | 200 | D | AC235590.2 | 96343    | 142836 | + | 39.9 Mb |
| gb | DP001173 | gnl | NISC-CON | sparrow_T213_24417751 | 4467750 | 201 | N | 50000      | clone    | yes    |   |         |
| gb | DP001173 | gnl | NISC-CON | sparrow_T213_24467751 | 4507725 | 202 | D | AC235592.2 | 1        | 39975  | + | 55.9 Mb |
| gb | DP001173 | gnl | NISC-CON | sparrow_T213_24507726 | 4507825 | 203 | N | 100        | fragment | yes    |   |         |
| gb | DP001173 | gnl | NISC-CON | sparrow_T213_24507826 | 4610646 | 204 | D | AC235592.2 | 40076    | 142896 | + |         |
| gb | DP001173 | gnl | NISC-CON | sparrow_T213_24610647 | 4685405 | 205 | D | AC236257.3 | 1        | 74759  | + |         |
| gb | DP001173 | gnl | NISC-CON | sparrow_T213_24685406 | 4685505 | 206 | N | 100        | fragment | yes    |   |         |
| gb | DP001173 | gnl | NISC-CON | sparrow_T213_24685506 | 4722668 | 207 | D | AC236257.3 | 74860    | 112022 | + |         |
| gb | DP001173 | gnl | NISC-CON | sparrow_T213_24722669 | 4722768 | 208 | N | 100        | fragment | yes    |   |         |
| gb | DP001173 | gnl | NISC-CON | sparrow_T213_24722769 | 4727614 | 209 | D | AC236257.3 | 112123   | 116968 | + |         |
| gb | DP001173 | gnl | NISC-CON | sparrow_T213_24727615 | 4759682 | 210 | D | AC236808.2 | 1        | 32068  | + |         |
| gb | DP001173 | gnl | NISC-CON | sparrow_T213_24759683 | 4759782 | 211 | N | 100        | fragment | yes    |   |         |
| gb | DP001173 | gnl | NISC-CON | sparrow_T213_24759783 | 4794532 | 212 | D | AC236808.2 | 32169    | 66918  | + |         |
| gb | DP001173 | gnl | NISC-CON | sparrow_T213_24794533 | 4794632 | 213 | N | 100        | fragment | yes    |   |         |
| gb | DP001173 | gnl | NISC-CON | sparrow_T213_24794633 | 4890302 | 214 | D | AC236808.2 | 67019    | 162688 | + |         |
| gb | DP001173 | gnl | NISC-CON | sparrow_T213_24890303 | 4898062 | 215 | D | AC235716.2 | 17373    | 25132  | + |         |
| gb | DP001173 | gnl | NISC-CON | sparrow_T213_24898063 | 4898162 | 216 | N | 100        | fragment | yes    |   |         |
| gb | DP001173 | gnl | NISC-CON | sparrow_T213_24898163 | 4965469 | 217 | D | AC235716.2 | 25233    | 92539  | + |         |
| gb | DP001173 | gnl | NISC-CON | sparrow_T213_24965470 | 4965569 | 218 | N | 100        | fragment | yes    |   |         |
| gb | DP001173 | gnl | NISC-CON | sparrow_T213_24965570 | 4975993 | 219 | D | AC235716.2 | 92640    | 103063 | + |         |
| gb | DP001173 | gnl | NISC-CON | sparrow_T213_24975994 | 4976093 | 220 | N | 100        | fragment | yes    |   |         |
| gb | DP001173 | gnl | NISC-CON | sparrow_T213_24976094 | 4979179 | 221 | D | AC235716.2 | 103164   | 106249 | + |         |
| gb | DP001173 | gnl | NISC-CON | sparrow_T213_24979180 | 4979279 | 222 | N | 100        | fragment | yes    |   |         |
| gb | DP001173 | gnl | NISC-CON | sparrow_T213_24979280 | 5017002 | 223 | D | AC235716.2 | 106350   | 144072 | + | 56.4 Mb |
| gb | DP001173 | gnl | NISC-CON | sparrow_T213_25017003 | 5067002 | 224 | N | 50000      | clone    | yes    |   |         |
| gb | DP001173 | gnl | NISC-CON | sparrow_T213_25067003 | 5163741 | 225 | D | AC235714.2 | 1        | 96739  | + | 65.9 Mb |
| gb | DP001173 | gnl | NISC-CON | sparrow_T213_25163742 | 5163841 | 226 | N | 100        | fragment | yes    |   |         |
| gb | DP001173 | gnl | NISC-CON | sparrow_T213_25163842 | 5223237 | 227 | D | AC235714.2 | 96840    | 156235 | + | 66.1 Mb |
| gb | DP001173 | gnl | NISC-CON | sparrow_T213_25223238 | 5273237 | 228 | N | 50000      | clone    | yes    |   |         |
| gb | DP001173 | gnl | NISC-CON | sparrow_T213_25273238 | 5356412 | 229 | D | AC237121.2 | 1        | 83175  | + | 69.6 Mb |
| gb | DP001173 | gnl | NISC-CON | sparrow_T213_25356413 | 5356512 | 230 | N | 100        | fragment | yes    |   |         |
| gb | DP001173 | gnl | NISC-CON | sparrow_T213_25356513 | 5422939 | 231 | D | AC237121.2 | 83276    | 149702 | + | 69.8 Mb |
| gb | DP001173 | gnl | NISC-CON | sparrow_T213_25422940 | 5472939 | 232 | N | 50000      | clone    | yes    |   |         |
| gb | DP001173 | gnl | NISC-CON | sparrow_T213_25472940 | 5477543 | 233 | D | AC235591.3 | 1        | 4604   | + | 69.8 Mb |
| gb | DP001173 | gnl | NISC-CON | sparrow_T213_25477544 | 5477643 | 234 | N | 100        | fragment | yes    |   |         |
| gb | DP001173 | gnl | NISC-CON | sparrow_T213_25477644 | 5515211 | 235 | D | AC235591.3 | 4705     | 42272  | + |         |
| gb | DP001173 | gnl | NISC-CON | sparrow_T213_25515212 | 5515311 | 236 | N | 100        | fragment | yes    |   |         |
| gb | DP001173 | gnl | NISC-CON | sparrow_T213_25515312 | 5552337 | 237 | D | AC235591.3 | 42373    | 79398  | + |         |
| gb | DP001173 | gnl | NISC-CON | sparrow_T213_25552338 | 5552437 | 238 | N | 100        | fragment | yes    |   |         |
| gb | DP001173 | gnl | NISC-CON | sparrow_T213_25552438 | 5629979 | 239 | D | AC235591.3 | 79499    | 157040 | + |         |
| gb | DP001173 | gnl | NISC-CON | sparrow_T213_25629980 | 5646899 | 240 | D | AC236559.2 | 1        | 16920  | + |         |
| gb | DP001173 | gnl | NISC-CON | sparrow_T213_25646900 | 5646999 | 241 | N | 100        | fragment | yes    |   |         |
| gb | DP001173 | gnl | NISC-CON | sparrow_T213_25647000 | 5659085 | 242 | D | AC236559.2 | 17021    | 29106  | + |         |
| gb | DP001173 | gnl | NISC-CON | sparrow_T213_25659086 | 5659185 | 243 | N | 100        | fragment | yes    |   |         |
| gb | DP001173 | gnl | NISC-CON | sparrow_T213_25659186 | 5721878 | 244 | D | AC236559.2 | 29207    | 91899  | + |         |
| gb | DP001173 | gnl | NISC-CON | sparrow_T213_25721879 | 5721978 | 245 | N | 100        | fragment | yes    |   |         |
| gb | DP001173 | gnl | NISC-CON | sparrow_T213_25721979 | 5772032 | 246 | D | AC236559.2 | 92000    | 142053 | + |         |
| gb | DP001173 | gnl | NISC-CON | sparrow_T213_25772033 | 5772132 | 247 | N | 100        | fragment | yes    |   |         |
| gb | DP001173 | gnl | NISC-CON | sparrow_T213_25772133 | 5772230 | 248 | D | AC236559.2 | 142154   | 142251 | + |         |

|    |          |     |          |                       |         |     |   |            |          |        |   |                                 |
|----|----------|-----|----------|-----------------------|---------|-----|---|------------|----------|--------|---|---------------------------------|
| gb | DP001173 | gnl | NISC-CON | sparrow_T213_25772231 | 5793908 | 249 | D | AC237271.2 | 43151    | 64828  | + |                                 |
| gb | DP001173 | gnl | NISC-CON | sparrow_T213_25793909 | 5794008 | 250 | N | 100        | fragment | yes    |   |                                 |
| gb | DP001173 | gnl | NISC-CON | sparrow_T213_25794009 | 5808534 | 251 | D | AC237271.2 | 64929    | 79454  | + |                                 |
| gb | DP001173 | gnl | NISC-CON | sparrow_T213_25808535 | 5808634 | 252 | N | 100        | fragment | yes    |   |                                 |
| gb | DP001173 | gnl | NISC-CON | sparrow_T213_25808635 | 5830960 | 253 | D | AC237271.2 | 79555    | 101880 | + |                                 |
| gb | DP001173 | gnl | NISC-CON | sparrow_T213_25830961 | 5831060 | 254 | N | 100        | fragment | yes    |   |                                 |
| gb | DP001173 | gnl | NISC-CON | sparrow_T213_25831061 | 5879852 | 255 | D | AC237271.2 | 101981   | 150772 | + |                                 |
| gb | DP001173 | gnl | NISC-CON | sparrow_T213_25879853 | 5894781 | 256 | D | AC237063.2 | 1        | 14929  | + |                                 |
| gb | DP001173 | gnl | NISC-CON | sparrow_T213_25894782 | 5894881 | 257 | N | 100        | fragment | yes    |   |                                 |
| gb | DP001173 | gnl | NISC-CON | sparrow_T213_25894882 | 5947458 | 258 | D | AC237063.2 | 15030    | 67606  | + |                                 |
| gb | DP001173 | gnl | NISC-CON | sparrow_T213_25947459 | 5947558 | 259 | N | 100        | fragment | yes    |   |                                 |
| gb | DP001173 | gnl | NISC-CON | sparrow_T213_25947559 | 6041638 | 260 | D | AC237063.2 | 67707    | 161786 | + | 70.3 Mb, 5973007^5973008, 108.3 |
| Mb |          |     |          |                       |         |     |   |            |          |        |   |                                 |
| gb | DP001173 | gnl | NISC-CON | sparrow_T213_26041639 | 6091638 | 261 | N | 50000      | clone    | yes    |   |                                 |
| gb | DP001173 | gnl | NISC-CON | sparrow_T213_26091639 | 6115753 | 262 | D | AC239424.2 | 131435   | 155549 | - | 108.3 Mb                        |
| gb | DP001173 | gnl | NISC-CON | sparrow_T213_26115754 | 6115853 | 263 | N | 100        | fragment | yes    |   |                                 |
| gb | DP001173 | gnl | NISC-CON | sparrow_T213_26115854 | 6127079 | 264 | D | AC239424.2 | 120109   | 131334 | - |                                 |
| gb | DP001173 | gnl | NISC-CON | sparrow_T213_26127080 | 6127179 | 265 | N | 100        | fragment | yes    |   |                                 |
| gb | DP001173 | gnl | NISC-CON | sparrow_T213_26127180 | 6149512 | 266 | D | AC239424.2 | 97676    | 120008 | - |                                 |
| gb | DP001173 | gnl | NISC-CON | sparrow_T213_26149513 | 6149612 | 267 | N | 100        | fragment | yes    |   |                                 |
| gb | DP001173 | gnl | NISC-CON | sparrow_T213_26149613 | 6162478 | 268 | D | AC239424.2 | 84710    | 97575  | - |                                 |
| gb | DP001173 | gnl | NISC-CON | sparrow_T213_26162479 | 6162578 | 269 | N | 100        | fragment | yes    |   |                                 |
| gb | DP001173 | gnl | NISC-CON | sparrow_T213_26162579 | 6247187 | 270 | D | AC239424.2 | 1        | 84609  | - |                                 |
| gb | DP001173 | gnl | NISC-CON | sparrow_T213_26247188 | 6258584 | 271 | D | AC235997.2 | 121268   | 132664 | - |                                 |
| gb | DP001173 | gnl | NISC-CON | sparrow_T213_26258585 | 6258684 | 272 | N | 100        | fragment | yes    |   |                                 |
| gb | DP001173 | gnl | NISC-CON | sparrow_T213_26258685 | 6264744 | 273 | D | AC235997.2 | 115108   | 121167 | - |                                 |
| gb | DP001173 | gnl | NISC-CON | sparrow_T213_26264745 | 6264844 | 274 | N | 100        | fragment | yes    |   |                                 |
| gb | DP001173 | gnl | NISC-CON | sparrow_T213_26264845 | 6275514 | 275 | D | AC235997.2 | 104338   | 115007 | - |                                 |
| gb | DP001173 | gnl | NISC-CON | sparrow_T213_26275515 | 6275614 | 276 | N | 100        | fragment | yes    |   |                                 |
| gb | DP001173 | gnl | NISC-CON | sparrow_T213_26275615 | 6278112 | 277 | D | AC235997.2 | 101740   | 104237 | - |                                 |
| gb | DP001173 | gnl | NISC-CON | sparrow_T213_26278113 | 6278212 | 278 | N | 100        | fragment | yes    |   |                                 |
| gb | DP001173 | gnl | NISC-CON | sparrow_T213_26278213 | 6310106 | 279 | D | AC235997.2 | 69746    | 101639 | - |                                 |
| gb | DP001173 | gnl | NISC-CON | sparrow_T213_26310107 | 6310206 | 280 | N | 100        | fragment | yes    |   |                                 |
| gb | DP001173 | gnl | NISC-CON | sparrow_T213_26310207 | 6322323 | 281 | D | AC235997.2 | 57529    | 69645  | - |                                 |
| gb | DP001173 | gnl | NISC-CON | sparrow_T213_26322324 | 6322423 | 282 | N | 100        | fragment | yes    |   |                                 |
| gb | DP001173 | gnl | NISC-CON | sparrow_T213_26322424 | 6332925 | 283 | D | AC235997.2 | 46927    | 57428  | - |                                 |
| gb | DP001173 | gnl | NISC-CON | sparrow_T213_26332926 | 6333025 | 284 | N | 100        | fragment | yes    |   |                                 |
| gb | DP001173 | gnl | NISC-CON | sparrow_T213_26333026 | 6379851 | 285 | D | AC235997.2 | 1        | 46826  | - | 108.0 Mb                        |
| gb | DP001173 | gnl | NISC-CON | sparrow_T213_26379852 | 6429851 | 286 | N | 50000      | clone    | yes    |   |                                 |
| gb | DP001173 | gnl | NISC-CON | sparrow_T213_26429852 | 6458633 | 287 | D | AC235522.2 | 135135   | 163916 | - | 107.3 Mb                        |
| gb | DP001173 | gnl | NISC-CON | sparrow_T213_26458634 | 6458733 | 288 | N | 100        | fragment | yes    |   |                                 |
| gb | DP001173 | gnl | NISC-CON | sparrow_T213_26458734 | 6469993 | 289 | D | AC235522.2 | 123775   | 135034 | - |                                 |
| gb | DP001173 | gnl | NISC-CON | sparrow_T213_26469994 | 6470093 | 290 | N | 100        | fragment | yes    |   |                                 |
| gb | DP001173 | gnl | NISC-CON | sparrow_T213_26470094 | 6518052 | 291 | D | AC235522.2 | 75716    | 123674 | - |                                 |
| gb | DP001173 | gnl | NISC-CON | sparrow_T213_26518053 | 6518152 | 292 | N | 100        | fragment | yes    |   |                                 |
| gb | DP001173 | gnl | NISC-CON | sparrow_T213_26518153 | 6536910 | 293 | D | AC235522.2 | 56858    | 75615  | - |                                 |
| gb | DP001173 | gnl | NISC-CON | sparrow_T213_26536911 | 6537010 | 294 | N | 100        | fragment | yes    |   |                                 |
| gb | DP001173 | gnl | NISC-CON | sparrow_T213_26537011 | 6561021 | 295 | D | AC235522.2 | 32747    | 56757  | - |                                 |
| gb | DP001173 | gnl | NISC-CON | sparrow_T213_26561022 | 6662174 | 296 | D | AC235995.2 | 46652    | 147804 | - |                                 |
| gb | DP001173 | gnl | NISC-CON | sparrow_T213_26662175 | 6662274 | 297 | N | 100        | fragment | yes    |   |                                 |
| gb | DP001173 | gnl | NISC-CON | sparrow_T213_26662275 | 6708825 | 298 | D | AC235995.2 | 1        | 46551  | - | 107.0 Mb                        |

|    |          |     |          |                       |         |     |   |            |          |        |   |         |
|----|----------|-----|----------|-----------------------|---------|-----|---|------------|----------|--------|---|---------|
| gb | DP001173 | gnl | NISC-CON | sparrow_T213_26708826 | 6758825 | 299 | N | 50000      | clone    | yes    |   |         |
| gb | DP001173 | gnl | NISC-CON | sparrow_T213_26758826 | 6852175 | 300 | D | AC235521.2 | 50012    | 143361 | - | 99.8 Mb |
| gb | DP001173 | gnl | NISC-CON | sparrow_T213_26852176 | 6852275 | 301 | N | 100        | fragment | yes    |   |         |
| gb | DP001173 | gnl | NISC-CON | sparrow_T213_26852276 | 6877589 | 302 | D | AC235521.2 | 24598    | 49911  | - |         |
| gb | DP001173 | gnl | NISC-CON | sparrow_T213_26877590 | 6877689 | 303 | N | 100        | fragment | yes    |   |         |
| gb | DP001173 | gnl | NISC-CON | sparrow_T213_26877690 | 6902186 | 304 | D | AC235521.2 | 1        | 24497  | - | 99.6 Mb |
| gb | DP001173 | gnl | NISC-CON | sparrow_T213_26902187 | 6952186 | 305 | N | 50000      | clone    | yes    |   |         |
| gb | DP001173 | gnl | NISC-CON | sparrow_T213_26952187 | 6971235 | 306 | D | AC236603.2 | 129226   | 148274 | - | 99.6 Mb |
| gb | DP001173 | gnl | NISC-CON | sparrow_T213_26971236 | 6971335 | 307 | N | 100        | fragment | yes    |   |         |
| gb | DP001173 | gnl | NISC-CON | sparrow_T213_26971336 | 6981671 | 308 | D | AC236603.2 | 118790   | 129125 | - |         |
| gb | DP001173 | gnl | NISC-CON | sparrow_T213_26981672 | 6981771 | 309 | N | 100        | fragment | yes    |   |         |
| gb | DP001173 | gnl | NISC-CON | sparrow_T213_26981772 | 7036783 | 310 | D | AC236603.2 | 63678    | 118689 | - |         |
| gb | DP001173 | gnl | NISC-CON | sparrow_T213_27036784 | 7036883 | 311 | N | 100        | fragment | yes    |   |         |
| gb | DP001173 | gnl | NISC-CON | sparrow_T213_27036884 | 7084792 | 312 | D | AC236603.2 | 15669    | 63577  | - |         |
| gb | DP001173 | gnl | NISC-CON | sparrow_T213_27084793 | 7084892 | 313 | N | 100        | fragment | yes    |   |         |
| gb | DP001173 | gnl | NISC-CON | sparrow_T213_27084893 | 7100460 | 314 | D | AC236603.2 | 1        | 15568  | - | 99.4 Mb |
| gb | DP001173 | gnl | NISC-CON | sparrow_T213_27100461 | 7150460 | 315 | N | 50000      | clone    | yes    |   |         |
| gb | DP001173 | gnl | NISC-CON | sparrow_T213_27150461 | 7207589 | 316 | D | AC239423.2 | 93840    | 150968 | - | 99.4 Mb |
| gb | DP001173 | gnl | NISC-CON | sparrow_T213_27207590 | 7207689 | 317 | N | 100        | fragment | yes    |   |         |
| gb | DP001173 | gnl | NISC-CON | sparrow_T213_27207690 | 7209999 | 318 | D | AC239423.2 | 91430    | 93739  | - |         |
| gb | DP001173 | gnl | NISC-CON | sparrow_T213_27210000 | 7210099 | 319 | N | 100        | fragment | yes    |   |         |
| gb | DP001173 | gnl | NISC-CON | sparrow_T213_27210100 | 7212665 | 320 | D | AC239423.2 | 88764    | 91329  | - |         |
| gb | DP001173 | gnl | NISC-CON | sparrow_T213_27212666 | 7212765 | 321 | N | 100        | fragment | yes    |   |         |
| gb | DP001173 | gnl | NISC-CON | sparrow_T213_27212766 | 7238133 | 322 | D | AC239423.2 | 63296    | 88663  | - |         |
| gb | DP001173 | gnl | NISC-CON | sparrow_T213_27238134 | 7238233 | 323 | N | 100        | fragment | yes    |   |         |
| gb | DP001173 | gnl | NISC-CON | sparrow_T213_27238234 | 7301428 | 324 | D | AC239423.2 | 1        | 63195  | - | 99.2 Mb |
| gb | DP001173 | gnl | NISC-CON | sparrow_T213_27301429 | 7351428 | 325 | N | 50000      | clone    | yes    |   |         |
| gb | DP001173 | gnl | NISC-CON | sparrow_T213_27351429 | 7468883 | 326 | D | AC235927.2 | 37737    | 155191 | - | 99.2 Mb |
| gb | DP001173 | gnl | NISC-CON | sparrow_T213_27468884 | 7468983 | 327 | N | 100        | fragment | yes    |   |         |
| gb | DP001173 | gnl | NISC-CON | sparrow_T213_27468984 | 7501237 | 328 | D | AC235927.2 | 5383     | 37636  | - |         |
| gb | DP001173 | gnl | NISC-CON | sparrow_T213_27501238 | 7501312 | 329 | D | AC236956.2 | 92400    | 92474  | - |         |
| gb | DP001173 | gnl | NISC-CON | sparrow_T213_27501313 | 7501412 | 330 | N | 100        | fragment | yes    |   |         |
| gb | DP001173 | gnl | NISC-CON | sparrow_T213_27501413 | 7506694 | 331 | D | AC235927.2 | 1        | 5282   | - |         |
| gb | DP001173 | gnl | NISC-CON | sparrow_T213_27506695 | 7510941 | 332 | D | AC236956.2 | 84650    | 88896  | - |         |
| gb | DP001173 | gnl | NISC-CON | sparrow_T213_27510942 | 7511041 | 333 | N | 100        | fragment | yes    |   |         |
| gb | DP001173 | gnl | NISC-CON | sparrow_T213_27511042 | 7513115 | 334 | D | AC236956.2 | 82476    | 84549  | - |         |
| gb | DP001173 | gnl | NISC-CON | sparrow_T213_27513116 | 7513215 | 335 | N | 100        | fragment | yes    |   |         |
| gb | DP001173 | gnl | NISC-CON | sparrow_T213_27513216 | 7524649 | 336 | D | AC236956.2 | 70942    | 82375  | - |         |
| gb | DP001173 | gnl | NISC-CON | sparrow_T213_27524650 | 7524749 | 337 | N | 100        | fragment | yes    |   |         |
| gb | DP001173 | gnl | NISC-CON | sparrow_T213_27524750 | 7570873 | 338 | D | AC236956.2 | 24718    | 70841  | - |         |
| gb | DP001173 | gnl | NISC-CON | sparrow_T213_27570874 | 7571280 | 339 | D | AC236049.2 | 119810   | 120216 | - |         |
| gb | DP001173 | gnl | NISC-CON | sparrow_T213_27571281 | 7574482 | 340 | D | AC236956.2 | 21125    | 24326  | - |         |
| gb | DP001173 | gnl | NISC-CON | sparrow_T213_27574483 | 7574582 | 341 | N | 100        | fragment | yes    |   |         |
| gb | DP001173 | gnl | NISC-CON | sparrow_T213_27574583 | 7589596 | 342 | D | AC236956.2 | 6011     | 21024  | - |         |
| gb | DP001173 | gnl | NISC-CON | sparrow_T213_27589597 | 7633245 | 343 | D | AC236049.2 | 58723    | 102371 | - |         |
| gb | DP001173 | gnl | NISC-CON | sparrow_T213_27633246 | 7633345 | 344 | N | 100        | fragment | yes    |   |         |
| gb | DP001173 | gnl | NISC-CON | sparrow_T213_27633346 | 7691967 | 345 | D | AC236049.2 | 1        | 58622  | - | 98.9 Mb |
| gb | DP001173 | gnl | NISC-CON | sparrow_T213_27691968 | 7741967 | 346 | N | 50000      | clone    | yes    |   |         |
| gb | DP001173 | gnl | NISC-CON | sparrow_T213_27741968 | 7862531 | 347 | D | AC235586.2 | 41490    | 162053 | - | 90.1 Mb |
| gb | DP001173 | gnl | NISC-CON | sparrow_T213_27862532 | 7862631 | 348 | N | 100        | fragment | yes    |   |         |
| gb | DP001173 | gnl | NISC-CON | sparrow_T213_27862632 | 7904020 | 349 | D | AC235586.2 | 1        | 41389  | - |         |

|        |          |     |          |                       |         |        |    |            |            |          |        |         |                    |
|--------|----------|-----|----------|-----------------------|---------|--------|----|------------|------------|----------|--------|---------|--------------------|
| gb     | DP001173 | gnl | NISC-CON | sparrow_T213_27904021 | 7927974 | 350    | D  | AC235925.2 | 106163     | 130116   | -      |         |                    |
| gb     | DP001173 | gnl | NISC-CON | sparrow_T213_27927975 | 7928074 | 351    | N  | 100        | fragment   | yes      |        |         |                    |
| gb     | DP001173 | gnl | NISC-CON | sparrow_T213_27928075 | 8034136 | 352    | D  | AC235925.2 | 1          | 106062   | -      | 90.0 Mb |                    |
| gb     | DP001173 | gnl | NISC-CON | sparrow_T213_28034137 | 8084136 | 353    | N  | 50000      | clone      | yes      |        |         |                    |
| gb     | DP001173 | gnl | NISC-CON | sparrow_T213_28084137 | 8085580 | 354    | D  | AC236255.2 | 159485     | 160928   | -      | 79.0 Mb |                    |
| gb     | DP001173 | gnl | NISC-CON | sparrow_T213_28085581 | 8085680 | 355    | N  | 100        | fragment   | yes      |        |         |                    |
| gb     | DP001173 | gnl | NISC-CON | sparrow_T213_28085681 | 8107013 | 356    | D  | AC236255.2 | 138052     | 159384   | -      |         |                    |
| gb     | DP001173 | gnl | NISC-CON | sparrow_T213_28107014 | 8107113 | 357    | N  | 100        | fragment   | yes      |        |         |                    |
| gb     | DP001173 | gnl | NISC-CON | sparrow_T213_28107114 | 8140787 | 358    | D  | AC236255.2 | 104278     | 137951   | -      |         |                    |
| gb     | DP001173 | gnl | NISC-CON | sparrow_T213_28140788 | 8140887 | 359    | N  | 100        | fragment   | yes      |        |         |                    |
| gb     | DP001173 | gnl | NISC-CON | sparrow_T213_28140888 | 8157473 | 360    | D  | AC236255.2 | 87592      | 104177   | -      |         |                    |
| gb     | DP001173 | gnl | NISC-CON | sparrow_T213_28157474 | 8157573 | 361    | N  | 100        | fragment   | yes      |        |         |                    |
| gb     | DP001173 | gnl | NISC-CON | sparrow_T213_28157574 | 8167988 | 362    | D  | AC236255.2 | 77077      | 87491    | -      |         |                    |
| gb     | DP001173 | gnl | NISC-CON | sparrow_T213_28167989 | 8168088 | 363    | N  | 100        | fragment   | yes      |        |         |                    |
| gb     | DP001173 | gnl | NISC-CON | sparrow_T213_28168089 | 8199607 | 364    | D  | AC236255.2 | 45458      | 76976    | -      |         |                    |
| gb     | DP001173 | gnl | NISC-CON | sparrow_T213_28199608 | 8205207 | 365    | D  | AC236602.2 | 128284     | 133883   | -      |         |                    |
| gb     | DP001173 | gnl | NISC-CON | sparrow_T213_28205208 | 8205307 | 366    | N  | 100        | fragment   | yes      |        |         |                    |
| gb     | DP001173 | gnl | NISC-CON | sparrow_T213_28205308 | 8254919 | 367    | D  | AC236602.2 | 78572      | 128183   | -      |         |                    |
| gb     | DP001173 | gnl | NISC-CON | sparrow_T213_28254920 | 8255019 | 368    | N  | 100        | fragment   | yes      |        |         |                    |
| gb     | DP001173 | gnl | NISC-CON | sparrow_T213_28255020 | 8255403 | 369    | D  | AC236602.2 | 58088      | 78471    | -      |         |                    |
| gb     | DP001173 | gnl | NISC-CON | sparrow_T213_28275404 | 8275503 | 370    | N  | 100        | fragment   | yes      |        |         |                    |
| gb     | DP001173 | gnl | NISC-CON | sparrow_T213_28275504 | 8333490 | 371    | D  | AC236602.2 | 1          | 57987    | -      | 78.8 Mb |                    |
| gb     | DP001173 | gnl | NISC-CON | sparrow_T213_28333491 | 8383490 | 372    | N  | 50000      | clone      | yes      |        |         |                    |
| gb     | DP001173 | gnl | NISC-CON | sparrow_T213_28383491 | 8499051 | 373    | D  | AC236256.2 | 46137      | 161697   | -      | 71.7 Mb |                    |
| gb     | DP001173 | gnl | NISC-CON | sparrow_T213_28499052 | 8499151 | 374    | N  | 100        | fragment   | yes      |        |         |                    |
| gb     | DP001173 | gnl | NISC-CON | sparrow_T213_28499152 | 8506479 | 375    | D  | AC236256.2 | 38709      | 46036    | -      |         |                    |
| gb     | DP001173 | gnl | NISC-CON | sparrow_T213_28506480 | 8506579 | 376    | N  | 100        | fragment   | yes      |        |         |                    |
| gb     | DP001173 | gnl | NISC-CON | sparrow_T213_28506580 | 8539889 | 377    | D  | AC236256.2 | 5299       | 38608    | -      |         |                    |
| gb     | DP001173 | gnl | NISC-CON | sparrow_T213_28539890 | 8693037 | 378    | D  | AC236561.2 | 1          | 153148   | -      | 71.5 Mb |                    |
| #ZAL2m |          |     |          |                       |         |        |    |            |            |          |        |         |                    |
| gb     | DP001174 | gnl | NISC-CON | sparrow_T213_2M       | 1       | 148400 | 1  | D          | AC235587.2 | 1        | 148400 | -       | 109.4 Mb, 109.3 Mb |
| gb     | DP001174 | gnl | NISC-CON | sparrow_T213_2M       | 148401  | 198400 | 2  | N          | 50000      | clone    | yes    |         |                    |
| gb     | DP001174 | gnl | NISC-CON | sparrow_T213_2M       | 198401  | 211103 | 3  | D          | AC236554.2 | 137131   | 149833 | -       | 109.2 Mb           |
| gb     | DP001174 | gnl | NISC-CON | sparrow_T213_2M       | 211104  | 211203 | 4  | N          | 100        | fragment | yes    |         |                    |
| gb     | DP001174 | gnl | NISC-CON | sparrow_T213_2M       | 211204  | 310265 | 5  | D          | AC236554.2 | 37969    | 137030 | -       |                    |
| gb     | DP001174 | gnl | NISC-CON | sparrow_T213_2M       | 310266  | 310365 | 6  | N          | 100        | fragment | yes    |         |                    |
| gb     | DP001174 | gnl | NISC-CON | sparrow_T213_2M       | 310366  | 348233 | 7  | D          | AC236554.2 | 1        | 37868  | -       |                    |
| gb     | DP001174 | gnl | NISC-CON | sparrow_T213_2M       | 348234  | 446201 | 8  | D          | AC235593.2 | 1        | 97968  | -       | 108.9 Mb           |
| gb     | DP001174 | gnl | NISC-CON | sparrow_T213_2M       | 446202  | 496201 | 9  | N          | 50000      | clone    | yes    |         |                    |
| gb     | DP001174 | gnl | NISC-CON | sparrow_T213_2M       | 496202  | 657474 | 10 | D          | AC235940.2 | 1        | 161273 | -       | 108.9 Mb           |
| gb     | DP001174 | gnl | NISC-CON | sparrow_T213_2M       | 657475  | 693440 | 11 | D          | AC236807.2 | 104028   | 139993 | -       |                    |
| gb     | DP001174 | gnl | NISC-CON | sparrow_T213_2M       | 693441  | 693540 | 12 | N          | 100        | fragment | yes    |         |                    |
| gb     | DP001174 | gnl | NISC-CON | sparrow_T213_2M       | 693541  | 797467 | 13 | D          | AC236807.2 | 1        | 103927 | -       | 108.6 Mb           |
| gb     | DP001174 | gnl | NISC-CON | sparrow_T213_2M       | 797468  | 847467 | 14 | N          | 50000      | clone    | yes    |         |                    |
| gb     | DP001174 | gnl | NISC-CON | sparrow_T213_2M       | 847468  | 871181 | 15 | D          | AC235944.2 | 137243   | 160956 | -       | 108.5 Mb           |
| gb     | DP001174 | gnl | NISC-CON | sparrow_T213_2M       | 871182  | 871281 | 16 | N          | 100        | fragment | yes    |         |                    |
| gb     | DP001174 | gnl | NISC-CON | sparrow_T213_2M       | 871282  | 878871 | 17 | D          | AC235944.2 | 129553   | 137142 | -       |                    |
| gb     | DP001174 | gnl | NISC-CON | sparrow_T213_2M       | 878872  | 878971 | 18 | N          | 100        | fragment | yes    |         |                    |
| gb     | DP001174 | gnl | NISC-CON | sparrow_T213_2M       | 878972  | 962374 | 19 | D          | AC235944.2 | 46050    | 129452 | -       |                    |
| gb     | DP001174 | gnl | NISC-CON | sparrow_T213_2M       | 962375  | 969518 | 20 | D          | AC236563.4 | 150984   | 158127 | -       |                    |
| gb     | DP001174 | gnl | NISC-CON | sparrow_T213_2M       | 969519  | 969618 | 21 | N          | 100        | fragment | yes    |         |                    |



|                  |          |     |          |                 |         |         |    |   |            |          |       |        |           |
|------------------|----------|-----|----------|-----------------|---------|---------|----|---|------------|----------|-------|--------|-----------|
| gb               | DP001174 | gnl | NISC-CON | sparrow_T213_2M | 969619  | 1002064 | 22 | D | AC235944.2 | 9894     | 42339 | -      |           |
| gb               | DP001174 | gnl | NISC-CON | sparrow_T213_2M | 1002065 | 1002164 | 23 | N | 100        | fragment |       | yes    |           |
| gb               | DP001174 | gnl | NISC-CON | sparrow_T213_2M | 1002165 | 1011957 | 24 | D | AC235944.2 | 1        |       | 9793   | -         |
| gb               | DP001174 | gnl | NISC-CON | sparrow_T213_2M | 1011958 | 1045429 | 25 | D | AC236563.4 | 77783    |       | 111254 | -         |
| gb               | DP001174 | gnl | NISC-CON | sparrow_T213_2M | 1045430 | 1045529 | 26 | N | 100        | fragment |       | yes    |           |
| gb               | DP001174 | gnl | NISC-CON | sparrow_T213_2M | 1045530 | 1120018 | 27 | D | AC236563.4 | 3194     |       | 77682  | -         |
| gb               | DP001174 | gnl | NISC-CON | sparrow_T213_2M | 1120019 | 1120118 | 28 | N | 100        | fragment |       | yes    |           |
| gb               | DP001174 | gnl | NISC-CON | sparrow_T213_2M | 1120119 | 1123211 | 29 | D | AC236563.4 | 1        |       | 3093   | -         |
| 1114540^1114541, |          |     |          | 70.3 Mb         |         |         |    |   |            |          |       |        | 108.3 Mb, |
| gb               | DP001174 | gnl | NISC-CON | sparrow_T213_2M | 1123212 | 1146396 | 30 | D | AC236052.3 | 7        |       | 23191  | +         |
| gb               | DP001174 | gnl | NISC-CON | sparrow_T213_2M | 1146397 | 1146496 | 31 | N | 100        | fragment |       | yes    |           |
| gb               | DP001174 | gnl | NISC-CON | sparrow_T213_2M | 1146497 | 1148681 | 32 | D | AC236052.3 | 23292    |       | 25476  | +         |
| gb               | DP001174 | gnl | NISC-CON | sparrow_T213_2M | 1148682 | 1148781 | 33 | N | 100        | fragment |       | yes    |           |
| gb               | DP001174 | gnl | NISC-CON | sparrow_T213_2M | 1148782 | 1157072 | 34 | D | AC236052.3 | 25577    |       | 33867  | +         |
| gb               | DP001174 | gnl | NISC-CON | sparrow_T213_2M | 1157073 | 1157172 | 35 | N | 100        | fragment |       | yes    |           |
| gb               | DP001174 | gnl | NISC-CON | sparrow_T213_2M | 1157173 | 1159215 | 36 | D | AC236052.3 | 33968    |       | 36010  | +         |
| gb               | DP001174 | gnl | NISC-CON | sparrow_T213_2M | 1159216 | 1159315 | 37 | N | 100        | fragment |       | yes    |           |
| gb               | DP001174 | gnl | NISC-CON | sparrow_T213_2M | 1159316 | 1175691 | 38 | D | AC236052.3 | 36111    |       | 52486  | +         |
| gb               | DP001174 | gnl | NISC-CON | sparrow_T213_2M | 1175692 | 1175791 | 39 | N | 100        | fragment |       | yes    |           |
| gb               | DP001174 | gnl | NISC-CON | sparrow_T213_2M | 1175792 | 1190055 | 40 | D | AC236052.3 | 52587    |       | 66850  | +         |
| gb               | DP001174 | gnl | NISC-CON | sparrow_T213_2M | 1190056 | 1190155 | 41 | N | 100        | fragment |       | yes    |           |
| gb               | DP001174 | gnl | NISC-CON | sparrow_T213_2M | 1190156 | 1196869 | 42 | D | AC236052.3 | 66951    |       | 73664  | +         |
| gb               | DP001174 | gnl | NISC-CON | sparrow_T213_2M | 1196870 | 1196969 | 43 | N | 100        | fragment |       | yes    |           |
| gb               | DP001174 | gnl | NISC-CON | sparrow_T213_2M | 1196970 | 1199617 | 44 | D | AC236052.3 | 73765    |       | 76412  | +         |
| gb               | DP001174 | gnl | NISC-CON | sparrow_T213_2M | 1199618 | 1199717 | 45 | N | 100        | fragment |       | yes    |           |
| gb               | DP001174 | gnl | NISC-CON | sparrow_T213_2M | 1199718 | 1206090 | 46 | D | AC236052.3 | 76513    |       | 82885  | +         |
| gb               | DP001174 | gnl | NISC-CON | sparrow_T213_2M | 1206091 | 1206190 | 47 | N | 100        | fragment |       | yes    |           |
| gb               | DP001174 | gnl | NISC-CON | sparrow_T213_2M | 1206191 | 1208253 | 48 | D | AC236052.3 | 82986    |       | 85048  | +         |
| gb               | DP001174 | gnl | NISC-CON | sparrow_T213_2M | 1208254 | 1208353 | 49 | N | 100        | fragment |       | yes    |           |
| gb               | DP001174 | gnl | NISC-CON | sparrow_T213_2M | 1208354 | 1242904 | 50 | D | AC236052.3 | 85149    |       | 119699 | +         |
| gb               | DP001174 | gnl | NISC-CON | sparrow_T213_2M | 1242905 | 1243004 | 51 | N | 100        | fragment |       | yes    |           |
| gb               | DP001174 | gnl | NISC-CON | sparrow_T213_2M | 1243005 | 1266989 | 52 | D | AC236052.3 | 119800   |       | 143784 | +         |
| gb               | DP001174 | gnl | NISC-CON | sparrow_T213_2M | 1266990 | 1316989 | 53 | N | 50000      | clone    | yes   |        | 70.4 Mb   |
| gb               | DP001174 | gnl | NISC-CON | sparrow_T213_2M | 1316990 | 1363498 | 54 | D | AC236553.3 | 1        |       | 46509  | +         |
| gb               | DP001174 | gnl | NISC-CON | sparrow_T213_2M | 1363499 | 1363598 | 55 | N | 100        | fragment |       | yes    | 70.4 Mb   |
| gb               | DP001174 | gnl | NISC-CON | sparrow_T213_2M | 1363599 | 1411304 | 56 | D | AC236553.3 | 46610    |       | 94315  | +         |
| gb               | DP001174 | gnl | NISC-CON | sparrow_T213_2M | 1411305 | 1411404 | 57 | N | 100        | fragment |       | yes    |           |
| gb               | DP001174 | gnl | NISC-CON | sparrow_T213_2M | 1411405 | 1413890 | 58 | D | AC236553.3 | 94416    |       | 96901  | +         |
| gb               | DP001174 | gnl | NISC-CON | sparrow_T213_2M | 1413891 | 1413990 | 59 | N | 100        | fragment |       | yes    |           |
| gb               | DP001174 | gnl | NISC-CON | sparrow_T213_2M | 1413991 | 1434735 | 60 | D | AC236553.3 | 97002    |       | 117746 | +         |
| gb               | DP001174 | gnl | NISC-CON | sparrow_T213_2M | 1434736 | 1434835 | 61 | N | 100        | fragment |       | yes    |           |
| gb               | DP001174 | gnl | NISC-CON | sparrow_T213_2M | 1434836 | 1459536 | 62 | D | AC236553.3 | 117847   |       | 142547 | +         |
| gb               | DP001174 | gnl | NISC-CON | sparrow_T213_2M | 1459537 | 1549773 | 63 | D | AC235936.2 | 1        |       | 90237  | +         |
| gb               | DP001174 | gnl | NISC-CON | sparrow_T213_2M | 1549774 | 1549873 | 64 | N | 100        | fragment |       | yes    |           |
| gb               | DP001174 | gnl | NISC-CON | sparrow_T213_2M | 1549874 | 1581029 | 65 | D | AC235936.2 | 90338    |       | 121493 | +         |
| gb               | DP001174 | gnl | NISC-CON | sparrow_T213_2M | 1581030 | 1581129 | 66 | N | 100        | fragment |       | yes    |           |
| gb               | DP001174 | gnl | NISC-CON | sparrow_T213_2M | 1581130 | 1598105 | 67 | D | AC235936.2 | 121594   |       | 138569 | +         |
| gb               | DP001174 | gnl | NISC-CON | sparrow_T213_2M | 1598106 | 1648105 | 68 | N | 50000      | clone    | yes   |        | 70.7 Mb   |
| gb               | DP001174 | gnl | NISC-CON | sparrow_T213_2M | 1648106 | 1661779 | 69 | D | AC236861.2 | 1        |       | 13674  | +         |
| gb               | DP001174 | gnl | NISC-CON | sparrow_T213_2M | 1661780 | 1661879 | 70 | N | 100        | fragment |       | yes    | 70.7 Mb   |
| gb               | DP001174 | gnl | NISC-CON | sparrow_T213_2M | 1661880 | 1677459 | 71 | D | AC236861.2 | 13775    |       | 29354  | +         |

|    |          |     |          |                 |         |         |     |   |            |          |        |   |         |
|----|----------|-----|----------|-----------------|---------|---------|-----|---|------------|----------|--------|---|---------|
| gb | DP001174 | gnl | NISC-CON | sparrow_T213_2M | 1677460 | 1677559 | 72  | N | 100        | fragment | yes    |   |         |
| gb | DP001174 | gnl | NISC-CON | sparrow_T213_2M | 1677560 | 1704768 | 73  | D | AC236861.2 | 29455    | 56663  | + |         |
| gb | DP001174 | gnl | NISC-CON | sparrow_T213_2M | 1704769 | 1704868 | 74  | N | 100        | fragment | yes    |   |         |
| gb | DP001174 | gnl | NISC-CON | sparrow_T213_2M | 1704869 | 1749969 | 75  | D | AC236861.2 | 56764    | 101864 | + |         |
| gb | DP001174 | gnl | NISC-CON | sparrow_T213_2M | 1749970 | 1750069 | 76  | N | 100        | fragment | yes    |   |         |
| gb | DP001174 | gnl | NISC-CON | sparrow_T213_2M | 1750070 | 1771444 | 77  | D | AC236861.2 | 101965   | 123339 | + |         |
| gb | DP001174 | gnl | NISC-CON | sparrow_T213_2M | 1771445 | 1771544 | 78  | N | 100        | fragment | yes    |   |         |
| gb | DP001174 | gnl | NISC-CON | sparrow_T213_2M | 1771545 | 1821092 | 79  | D | AC236861.2 | 123440   | 172987 | + | 70.9 Mb |
| gb | DP001174 | gnl | NISC-CON | sparrow_T213_2M | 1821093 | 1871092 | 80  | N | 50000      | clone    | yes    |   |         |
| gb | DP001174 | gnl | NISC-CON | sparrow_T213_2M | 1871093 | 1889752 | 81  | D | AC236250.2 | 1        | 18660  | + | 71.0 Mb |
| gb | DP001174 | gnl | NISC-CON | sparrow_T213_2M | 1889753 | 1889852 | 82  | N | 100        | fragment | yes    |   |         |
| gb | DP001174 | gnl | NISC-CON | sparrow_T213_2M | 1889853 | 1904238 | 83  | D | AC236250.2 | 18761    | 33146  | + |         |
| gb | DP001174 | gnl | NISC-CON | sparrow_T213_2M | 1904239 | 1904338 | 84  | N | 100        | fragment | yes    |   |         |
| gb | DP001174 | gnl | NISC-CON | sparrow_T213_2M | 1904339 | 1955010 | 85  | D | AC236250.2 | 33247    | 83918  | + |         |
| gb | DP001174 | gnl | NISC-CON | sparrow_T213_2M | 1955011 | 1955110 | 86  | N | 100        | fragment | yes    |   |         |
| gb | DP001174 | gnl | NISC-CON | sparrow_T213_2M | 1955111 | 1975693 | 87  | D | AC236250.2 | 84019    | 104601 | + |         |
| gb | DP001174 | gnl | NISC-CON | sparrow_T213_2M | 1975694 | 1975793 | 88  | N | 100        | fragment | yes    |   |         |
| gb | DP001174 | gnl | NISC-CON | sparrow_T213_2M | 1975794 | 2002121 | 89  | D | AC236250.2 | 104702   | 131029 | + |         |
| gb | DP001174 | gnl | NISC-CON | sparrow_T213_2M | 2002122 | 2027780 | 90  | D | AC236601.2 | 1        | 25659  | + |         |
| gb | DP001174 | gnl | NISC-CON | sparrow_T213_2M | 2027781 | 2027880 | 91  | N | 100        | fragment | yes    |   |         |
| gb | DP001174 | gnl | NISC-CON | sparrow_T213_2M | 2027881 | 2031806 | 92  | D | AC236601.2 | 25760    | 29685  | + |         |
| gb | DP001174 | gnl | NISC-CON | sparrow_T213_2M | 2031807 | 2031906 | 93  | N | 100        | fragment | yes    |   |         |
| gb | DP001174 | gnl | NISC-CON | sparrow_T213_2M | 2031907 | 2137892 | 94  | D | AC236601.2 | 29786    | 135771 | + |         |
| gb | DP001174 | gnl | NISC-CON | sparrow_T213_2M | 2137893 | 2137992 | 95  | N | 100        | fragment | yes    |   |         |
| gb | DP001174 | gnl | NISC-CON | sparrow_T213_2M | 2137993 | 2164353 | 96  | D | AC236601.2 | 135872   | 162232 | + | 71.3 Mb |
| gb | DP001174 | gnl | NISC-CON | sparrow_T213_2M | 2164354 | 2214353 | 97  | N | 50000      | clone    | yes    |   |         |
| gb | DP001174 | gnl | NISC-CON | sparrow_T213_2M | 2214354 | 2273352 | 98  | D | AC235938.2 | 1        | 58999  | + | 71.4 Mb |
| gb | DP001174 | gnl | NISC-CON | sparrow_T213_2M | 2273353 | 2321417 | 99  | D | AC237010.2 | 1        | 48065  | + |         |
| gb | DP001174 | gnl | NISC-CON | sparrow_T213_2M | 2321418 | 2321517 | 100 | N | 100        | fragment | yes    |   |         |
| gb | DP001174 | gnl | NISC-CON | sparrow_T213_2M | 2321518 | 2321585 | 101 | D | AC235938.2 | 107140   | 107207 | + |         |
| gb | DP001174 | gnl | NISC-CON | sparrow_T213_2M | 2321586 | 2431666 | 102 | D | AC237010.2 | 48166    | 158246 | + | 71.7 Mb |
| gb | DP001174 | gnl | NISC-CON | sparrow_T213_2M | 2431667 | 2481666 | 103 | N | 50000      | clone    | yes    |   |         |
| gb | DP001174 | gnl | NISC-CON | sparrow_T213_2M | 2481667 | 2503151 | 104 | D | AC235711.2 | 1        | 21485  | + | 78.8 Mb |
| gb | DP001174 | gnl | NISC-CON | sparrow_T213_2M | 2503152 | 2503251 | 105 | N | 100        | fragment | yes    |   |         |
| gb | DP001174 | gnl | NISC-CON | sparrow_T213_2M | 2503252 | 2516532 | 106 | D | AC235711.2 | 21586    | 34866  | + |         |
| gb | DP001174 | gnl | NISC-CON | sparrow_T213_2M | 2516533 | 2516632 | 107 | N | 100        | fragment | yes    |   |         |
| gb | DP001174 | gnl | NISC-CON | sparrow_T213_2M | 2516633 | 2544592 | 108 | D | AC235711.2 | 34967    | 62926  | + |         |
| gb | DP001174 | gnl | NISC-CON | sparrow_T213_2M | 2544593 | 2544692 | 109 | N | 100        | fragment | yes    |   |         |
| gb | DP001174 | gnl | NISC-CON | sparrow_T213_2M | 2544693 | 2578407 | 110 | D | AC235711.2 | 63027    | 96741  | + |         |
| gb | DP001174 | gnl | NISC-CON | sparrow_T213_2M | 2578408 | 2580722 | 111 | D | AC235589.2 | 1232     | 3546   | + |         |
| gb | DP001174 | gnl | NISC-CON | sparrow_T213_2M | 2580723 | 2614943 | 112 | D | AC235711.2 | 99199    | 133419 | + |         |
| gb | DP001174 | gnl | NISC-CON | sparrow_T213_2M | 2614944 | 2615043 | 113 | N | 100        | fragment | yes    |   |         |
| gb | DP001174 | gnl | NISC-CON | sparrow_T213_2M | 2615044 | 2649251 | 114 | D | AC235589.2 | 37533    | 71740  | + |         |
| gb | DP001174 | gnl | NISC-CON | sparrow_T213_2M | 2649252 | 2649351 | 115 | N | 100        | fragment | yes    |   |         |
| gb | DP001174 | gnl | NISC-CON | sparrow_T213_2M | 2649352 | 2662215 | 116 | D | AC235589.2 | 71841    | 84704  | + |         |
| gb | DP001174 | gnl | NISC-CON | sparrow_T213_2M | 2662216 | 2662315 | 117 | N | 100        | fragment | yes    |   |         |
| gb | DP001174 | gnl | NISC-CON | sparrow_T213_2M | 2662316 | 2670115 | 118 | D | AC235589.2 | 84805    | 92604  | + |         |
| gb | DP001174 | gnl | NISC-CON | sparrow_T213_2M | 2670116 | 2670215 | 119 | N | 100        | fragment | yes    |   |         |
| gb | DP001174 | gnl | NISC-CON | sparrow_T213_2M | 2670216 | 2710279 | 120 | D | AC235589.2 | 92705    | 132768 | + |         |
| gb | DP001174 | gnl | NISC-CON | sparrow_T213_2M | 2710280 | 2710379 | 121 | N | 100        | fragment | yes    |   |         |
| gb | DP001174 | gnl | NISC-CON | sparrow_T213_2M | 2710380 | 2713818 | 122 | D | AC235589.2 | 132869   | 136307 | + |         |

|                   |          |     |          |                 |         |         |     |   |            |          |        |   |          |
|-------------------|----------|-----|----------|-----------------|---------|---------|-----|---|------------|----------|--------|---|----------|
| gb                | DP001174 | gnl | NISC-CON | sparrow_T213_2M | 2713819 | 2713918 | 123 | N | 100        | fragment | yes    |   |          |
| gb                | DP001174 | gnl | NISC-CON | sparrow_T213_2M | 2713919 | 2735000 | 124 | D | AC235589.2 | 136408   | 157489 | + |          |
| gb                | DP001174 | gnl | NISC-CON | sparrow_T213_2M | 2735001 | 2735100 | 125 | N | 100        | fragment | yes    |   |          |
| gb                | DP001174 | gnl | NISC-CON | sparrow_T213_2M | 2735101 | 2737651 | 126 | D | AC235589.2 | 157590   | 160140 | + | 79.0 Mb  |
| gb                | DP001174 | gnl | NISC-CON | sparrow_T213_2M | 2737652 | 2787651 | 127 | N | 50000      | clone    | yes    |   |          |
| gb                | DP001174 | gnl | NISC-CON | sparrow_T213_2M | 2787652 | 2862469 | 128 | D | AC235594.2 | 1        | 74818  | + | 89.9 Mb  |
| gb                | DP001174 | gnl | NISC-CON | sparrow_T213_2M | 2862470 | 2862569 | 129 | N | 100        | fragment | yes    |   |          |
| gb                | DP001174 | gnl | NISC-CON | sparrow_T213_2M | 2862570 | 2914663 | 130 | D | AC235594.2 | 74919    | 127012 | + |          |
| gb                | DP001174 | gnl | NISC-CON | sparrow_T213_2M | 2914664 | 2914763 | 131 | N | 100        | fragment | yes    |   |          |
| gb                | DP001174 | gnl | NISC-CON | sparrow_T213_2M | 2914764 | 2926828 | 132 | D | AC236468.2 | 38126    | 50190  | + |          |
| gb                | DP001174 | gnl | NISC-CON | sparrow_T213_2M | 2926829 | 2926928 | 133 | N | 100        | fragment | yes    |   |          |
| gb                | DP001174 | gnl | NISC-CON | sparrow_T213_2M | 2926929 | 3041132 | 134 | D | AC236468.2 | 50291    | 164494 | + | 90.1 Mb  |
| gb                | DP001174 | gnl | NISC-CON | sparrow_T213_2M | 3041133 | 3091132 | 135 | N | 50000      | clone    | yes    |   |          |
| gb                | DP001174 | gnl | NISC-CON | sparrow_T213_2M | 3091133 | 3116229 | 136 | D | AC235932.2 | 1        | 25097  | + | 98.6 Mb  |
| gb                | DP001174 | gnl | NISC-CON | sparrow_T213_2M | 3116230 | 3116329 | 137 | N | 100        | fragment | yes    |   |          |
| gb                | DP001174 | gnl | NISC-CON | sparrow_T213_2M | 3116330 | 3174915 | 138 | D | AC235932.2 | 25198    | 83783  | + |          |
| gb                | DP001174 | gnl | NISC-CON | sparrow_T213_2M | 3174916 | 3281861 | 139 | D | AC236555.2 | 1        | 106946 | + |          |
| gb                | DP001174 | gnl | NISC-CON | sparrow_T213_2M | 3281862 | 3281961 | 140 | N | 100        | fragment | yes    |   |          |
| gb                | DP001174 | gnl | NISC-CON | sparrow_T213_2M | 3281962 | 3308182 | 141 | D | AC236555.2 | 107047   | 133267 | + |          |
| gb                | DP001174 | gnl | NISC-CON | sparrow_T213_2M | 3308183 | 3308282 | 142 | N | 100        | fragment | yes    |   |          |
| gb                | DP001174 | gnl | NISC-CON | sparrow_T213_2M | 3308283 | 3329391 | 143 | D | AC236555.2 | 133368   | 154476 | + | 98.9 Mb  |
| gb                | DP001174 | gnl | NISC-CON | sparrow_T213_2M | 3329392 | 3379391 | 144 | N | 50000      | clone    | yes    |   |          |
| gb                | DP001174 | gnl | NISC-CON | sparrow_T213_2M | 3379392 | 3436210 | 145 | D | AC236556.2 | 1        | 56819  | + | 98.9 Mb  |
| gb                | DP001174 | gnl | NISC-CON | sparrow_T213_2M | 3436211 | 3436310 | 146 | N | 100        | fragment | yes    |   |          |
| gb                | DP001174 | gnl | NISC-CON | sparrow_T213_2M | 3436311 | 3446974 | 147 | D | AC236556.2 | 56920    | 67583  | + |          |
| gb                | DP001174 | gnl | NISC-CON | sparrow_T213_2M | 3446975 | 3447074 | 148 | N | 100        | fragment | yes    |   |          |
| gb                | DP001174 | gnl | NISC-CON | sparrow_T213_2M | 3447075 | 3483225 | 149 | D | AC236556.2 | 67684    | 103834 | + |          |
| gb                | DP001174 | gnl | NISC-CON | sparrow_T213_2M | 3483226 | 3500697 | 150 | D | AC236089.2 | 1        | 17472  | + |          |
| gb                | DP001174 | gnl | NISC-CON | sparrow_T213_2M | 3500698 | 3520857 | 151 | D | AC236556.2 | 120720   | 140879 | + |          |
| gb                | DP001174 | gnl | NISC-CON | sparrow_T213_2M | 3520858 | 3551145 | 152 | D | AC236089.2 | 37649    | 67936  | + |          |
| gb                | DP001174 | gnl | NISC-CON | sparrow_T213_2M | 3551146 | 3551245 | 153 | N | 100        | fragment | yes    |   |          |
| gb                | DP001174 | gnl | NISC-CON | sparrow_T213_2M | 3551246 | 3566974 | 154 | D | AC236089.2 | 68037    | 83765  | + |          |
| gb                | DP001174 | gnl | NISC-CON | sparrow_T213_2M | 3566975 | 3567074 | 155 | N | 100        | fragment | yes    |   |          |
| gb                | DP001174 | gnl | NISC-CON | sparrow_T213_2M | 3567075 | 3632053 | 156 | D | AC236089.2 | 83866    | 148844 | + | 91.1 Mb, |
| 3597481..3612844, |          |     |          |                 |         |         |     |   |            |          |        |   | 24.1 Mb  |
| gb                | DP001174 | gnl | NISC-CON | sparrow_T213_2M | 3632054 | 3682053 | 157 | N | 50000      | clone    | yes    |   |          |
| gb                | DP001174 | gnl | NISC-CON | sparrow_T213_2M | 3682054 | 3700463 | 158 | D | AC236051.2 | 1        | 18410  | + | 24.1 Mb  |
| gb                | DP001174 | gnl | NISC-CON | sparrow_T213_2M | 3700464 | 3700563 | 159 | N | 100        | fragment | yes    |   |          |
| gb                | DP001174 | gnl | NISC-CON | sparrow_T213_2M | 3700564 | 3809137 | 160 | D | AC236051.2 | 18511    | 127084 | + |          |
| gb                | DP001174 | gnl | NISC-CON | sparrow_T213_2M | 3809138 | 3809237 | 161 | N | 100        | fragment | yes    |   |          |
| gb                | DP001174 | gnl | NISC-CON | sparrow_T213_2M | 3809238 | 3816648 | 162 | D | AC236051.2 | 127185   | 134595 | + |          |
| gb                | DP001174 | gnl | NISC-CON | sparrow_T213_2M | 3816649 | 3871969 | 163 | D | AC236252.2 | 1        | 55321  | + |          |
| gb                | DP001174 | gnl | NISC-CON | sparrow_T213_2M | 3871970 | 3872069 | 164 | N | 100        | fragment | yes    |   |          |
| gb                | DP001174 | gnl | NISC-CON | sparrow_T213_2M | 3872070 | 3886627 | 165 | D | AC236252.2 | 55422    | 69979  | + |          |
| gb                | DP001174 | gnl | NISC-CON | sparrow_T213_2M | 3886628 | 3886727 | 166 | N | 100        | fragment | yes    |   |          |
| gb                | DP001174 | gnl | NISC-CON | sparrow_T213_2M | 3886728 | 3905043 | 167 | D | AC236252.2 | 70080    | 88395  | + |          |
| gb                | DP001174 | gnl | NISC-CON | sparrow_T213_2M | 3905044 | 3905143 | 168 | N | 100        | fragment | yes    |   |          |
| gb                | DP001174 | gnl | NISC-CON | sparrow_T213_2M | 3905144 | 3920714 | 169 | D | AC236252.2 | 88496    | 104066 | + |          |
| gb                | DP001174 | gnl | NISC-CON | sparrow_T213_2M | 3920715 | 3920814 | 170 | N | 100        | fragment | yes    |   |          |
| gb                | DP001174 | gnl | NISC-CON | sparrow_T213_2M | 3920815 | 3967546 | 171 | D | AC236252.2 | 104167   | 150898 | + |          |
| gb                | DP001174 | gnl | NISC-CON | sparrow_T213_2M | 3967547 | 3967646 | 172 | N | 100        | fragment | yes    |   |          |

|    |          |     |          |                 |         |         |     |   |            |          |        |   |         |
|----|----------|-----|----------|-----------------|---------|---------|-----|---|------------|----------|--------|---|---------|
| gb | DP001174 | gnl | NISC-CON | sparrow_T213_2M | 3967647 | 3970082 | 173 | D | AC236252.2 | 150999   | 153434 | + |         |
| gb | DP001174 | gnl | NISC-CON | sparrow_T213_2M | 3970083 | 3970182 | 174 | N | 100        | fragment | yes    |   |         |
| gb | DP001174 | gnl | NISC-CON | sparrow_T213_2M | 3970183 | 3972673 | 175 | D | AC236252.2 | 153535   | 156025 | + | 24.5 Mb |
| gb | DP001174 | gnl | NISC-CON | sparrow_T213_2M | 3972674 | 4022673 | 176 | N | 50000      | clone    | yes    |   |         |
| gb | DP001174 | gnl | NISC-CON | sparrow_T213_2M | 4022674 | 4129506 | 177 | D | AC236955.2 | 1        | 106833 | + | 27.9 Mb |
| gb | DP001174 | gnl | NISC-CON | sparrow_T213_2M | 4129507 | 4129606 | 178 | N | 100        | fragment | yes    |   |         |
| gb | DP001174 | gnl | NISC-CON | sparrow_T213_2M | 4129607 | 4183395 | 179 | D | AC236955.2 | 106934   | 160722 | + |         |
| gb | DP001174 | gnl | NISC-CON | sparrow_T213_2M | 4183396 | 4185641 | 180 | D | AC237122.2 | 24846    | 27091  | + |         |
| gb | DP001174 | gnl | NISC-CON | sparrow_T213_2M | 4185642 | 4185741 | 181 | N | 100        | fragment | yes    |   |         |
| gb | DP001174 | gnl | NISC-CON | sparrow_T213_2M | 4185742 | 4252727 | 182 | D | AC237122.2 | 27192    | 94177  | + |         |
| gb | DP001174 | gnl | NISC-CON | sparrow_T213_2M | 4252728 | 4252827 | 183 | N | 100        | fragment | yes    |   |         |
| gb | DP001174 | gnl | NISC-CON | sparrow_T213_2M | 4252828 | 4272164 | 184 | D | AC235931.2 | 1        | 19337  | + |         |
| gb | DP001174 | gnl | NISC-CON | sparrow_T213_2M | 4272165 | 4272264 | 185 | N | 100        | fragment | yes    |   |         |
| gb | DP001174 | gnl | NISC-CON | sparrow_T213_2M | 4272265 | 4350164 | 186 | D | AC235931.2 | 19438    | 97337  | + |         |
| gb | DP001174 | gnl | NISC-CON | sparrow_T213_2M | 4350165 | 4350264 | 187 | N | 100        | fragment | yes    |   |         |
| gb | DP001174 | gnl | NISC-CON | sparrow_T213_2M | 4350265 | 4405094 | 188 | D | AC235931.2 | 97438    | 152267 | + | 28.3 Mb |
| gb | DP001174 | gnl | NISC-CON | sparrow_T213_2M | 4405095 | 4455094 | 189 | N | 50000      | clone    | yes    |   |         |
| gb | DP001174 | gnl | NISC-CON | sparrow_T213_2M | 4455095 | 4458860 | 190 | D | AC236690.2 | 1        | 3766   | + | 28.3 Mb |
| gb | DP001174 | gnl | NISC-CON | sparrow_T213_2M | 4458861 | 4458960 | 191 | N | 100        | fragment | yes    |   |         |
| gb | DP001174 | gnl | NISC-CON | sparrow_T213_2M | 4458961 | 4497241 | 192 | D | AC236690.2 | 3867     | 42147  | + |         |
| gb | DP001174 | gnl | NISC-CON | sparrow_T213_2M | 4497242 | 4573893 | 193 | D | AC235720.2 | 1        | 76652  | + |         |
| gb | DP001174 | gnl | NISC-CON | sparrow_T213_2M | 4573894 | 4573993 | 194 | N | 100        | fragment | yes    |   |         |
| gb | DP001174 | gnl | NISC-CON | sparrow_T213_2M | 4573994 | 4660941 | 195 | D | AC235720.2 | 76753    | 163700 | + | 28.5 Mb |
| gb | DP001174 | gnl | NISC-CON | sparrow_T213_2M | 4660942 | 4710941 | 196 | N | 50000      | clone    | yes    |   |         |
| gb | DP001174 | gnl | NISC-CON | sparrow_T213_2M | 4710942 | 4713793 | 197 | D | AC235707.2 | 154642   | 157493 | - | 21.9 Mb |
| gb | DP001174 | gnl | NISC-CON | sparrow_T213_2M | 4713794 | 4713893 | 198 | N | 100        | fragment | yes    |   |         |
| gb | DP001174 | gnl | NISC-CON | sparrow_T213_2M | 4713894 | 4728732 | 199 | D | AC235707.2 | 139703   | 154541 | - |         |
| gb | DP001174 | gnl | NISC-CON | sparrow_T213_2M | 4728733 | 4728832 | 200 | N | 100        | fragment | yes    |   |         |
| gb | DP001174 | gnl | NISC-CON | sparrow_T213_2M | 4728833 | 4783457 | 201 | D | AC235707.2 | 84978    | 139602 | - |         |
| gb | DP001174 | gnl | NISC-CON | sparrow_T213_2M | 4783458 | 4783557 | 202 | N | 100        | fragment | yes    |   |         |
| gb | DP001174 | gnl | NISC-CON | sparrow_T213_2M | 4783558 | 4786756 | 203 | D | AC235707.2 | 81679    | 84877  | - |         |
| gb | DP001174 | gnl | NISC-CON | sparrow_T213_2M | 4786757 | 4786856 | 204 | N | 100        | fragment | yes    |   |         |
| gb | DP001174 | gnl | NISC-CON | sparrow_T213_2M | 4786857 | 4818468 | 205 | D | AC235707.2 | 49967    | 81578  | - |         |
| gb | DP001174 | gnl | NISC-CON | sparrow_T213_2M | 4818469 | 4818568 | 206 | N | 100        | fragment | yes    |   |         |
| gb | DP001174 | gnl | NISC-CON | sparrow_T213_2M | 4818569 | 4822408 | 207 | D | AC235707.2 | 46027    | 49866  | - |         |
| gb | DP001174 | gnl | NISC-CON | sparrow_T213_2M | 4822409 | 4822508 | 208 | N | 100        | fragment | yes    |   |         |
| gb | DP001174 | gnl | NISC-CON | sparrow_T213_2M | 4822509 | 4825284 | 209 | D | AC235707.2 | 43151    | 45926  | - |         |
| gb | DP001174 | gnl | NISC-CON | sparrow_T213_2M | 4825285 | 4825384 | 210 | N | 100        | fragment | yes    |   |         |
| gb | DP001174 | gnl | NISC-CON | sparrow_T213_2M | 4825385 | 4868434 | 211 | D | AC235707.2 | 1        | 43050  | - |         |
| gb | DP001174 | gnl | NISC-CON | sparrow_T213_2M | 4868435 | 4869174 | 212 | D | AC236606.2 | 103771   | 104510 | - |         |
| gb | DP001174 | gnl | NISC-CON | sparrow_T213_2M | 4869175 | 4869274 | 213 | N | 100        | fragment | yes    |   |         |
| gb | DP001174 | gnl | NISC-CON | sparrow_T213_2M | 4869275 | 4959642 | 214 | D | AC236606.2 | 13303    | 103670 | - |         |
| gb | DP001174 | gnl | NISC-CON | sparrow_T213_2M | 4959643 | 4959742 | 215 | N | 100        | fragment | yes    |   |         |
| gb | DP001174 | gnl | NISC-CON | sparrow_T213_2M | 4959743 | 4972944 | 216 | D | AC236606.2 | 1        | 13202  | - | 21.6 Mb |
| gb | DP001174 | gnl | NISC-CON | sparrow_T213_2M | 4972945 | 5022944 | 217 | N | 50000      | clone    | yes    |   |         |
| gb | DP001174 | gnl | NISC-CON | sparrow_T213_2M | 5022945 | 5052357 | 218 | D | AC237272.2 | 125389   | 154801 | - | 20.0 Mb |
| gb | DP001174 | gnl | NISC-CON | sparrow_T213_2M | 5052358 | 5052457 | 219 | N | 100        | fragment | yes    |   |         |
| gb | DP001174 | gnl | NISC-CON | sparrow_T213_2M | 5052458 | 5101707 | 220 | D | AC237272.2 | 76039    | 125288 | - |         |
| gb | DP001174 | gnl | NISC-CON | sparrow_T213_2M | 5101708 | 5101807 | 221 | N | 100        | fragment | yes    |   |         |
| gb | DP001174 | gnl | NISC-CON | sparrow_T213_2M | 5101808 | 5119415 | 222 | D | AC237272.2 | 58331    | 75938  | - |         |
| gb | DP001174 | gnl | NISC-CON | sparrow_T213_2M | 5119416 | 5119515 | 223 | N | 100        | fragment | yes    |   |         |

|    |          |     |          |                 |         |         |     |   |            |          |        |   |         |
|----|----------|-----|----------|-----------------|---------|---------|-----|---|------------|----------|--------|---|---------|
| gb | DP001174 | gnl | NISC-CON | sparrow_T213_2M | 5119516 | 5135236 | 224 | D | AC237272.2 | 42510    | 58230  | - |         |
| gb | DP001174 | gnl | NISC-CON | sparrow_T213_2M | 5135237 | 5135336 | 225 | N | 100        | fragment | yes    |   |         |
| gb | DP001174 | gnl | NISC-CON | sparrow_T213_2M | 5135337 | 5177745 | 226 | D | AC237272.2 | 1        | 42409  | - | 19.8 Mb |
| gb | DP001174 | gnl | NISC-CON | sparrow_T213_2M | 5177746 | 5227745 | 227 | N | 50000      | clone    | yes    |   |         |
| gb | DP001174 | gnl | NISC-CON | sparrow_T213_2M | 5227746 | 5238825 | 228 | D | AC235928.2 | 1        | 11080  | + | 33.7 Mb |
| gb | DP001174 | gnl | NISC-CON | sparrow_T213_2M | 5238826 | 5238925 | 229 | N | 100        | fragment | yes    |   |         |
| gb | DP001174 | gnl | NISC-CON | sparrow_T213_2M | 5238926 | 5240993 | 230 | D | AC235928.2 | 11181    | 13248  | + |         |
| gb | DP001174 | gnl | NISC-CON | sparrow_T213_2M | 5240994 | 5241093 | 231 | N | 100        | fragment | yes    |   |         |
| gb | DP001174 | gnl | NISC-CON | sparrow_T213_2M | 5241094 | 5292720 | 232 | D | AC235928.2 | 13349    | 64975  | + |         |
| gb | DP001174 | gnl | NISC-CON | sparrow_T213_2M | 5292721 | 5292820 | 233 | N | 100        | fragment | yes    |   |         |
| gb | DP001174 | gnl | NISC-CON | sparrow_T213_2M | 5292821 | 5302293 | 234 | D | AC235928.2 | 65076    | 74548  | + |         |
| gb | DP001174 | gnl | NISC-CON | sparrow_T213_2M | 5302294 | 5302393 | 235 | N | 100        | fragment | yes    |   |         |
| gb | DP001174 | gnl | NISC-CON | sparrow_T213_2M | 5302394 | 5349242 | 236 | D | AC235928.2 | 74649    | 121497 | + |         |
| gb | DP001174 | gnl | NISC-CON | sparrow_T213_2M | 5349243 | 5421468 | 237 | D | AC236604.2 | 1        | 72226  | + |         |
| gb | DP001174 | gnl | NISC-CON | sparrow_T213_2M | 5421469 | 5421568 | 238 | N | 100        | fragment | yes    |   |         |
| gb | DP001174 | gnl | NISC-CON | sparrow_T213_2M | 5421569 | 5485634 | 239 | D | AC236604.2 | 72327    | 136392 | + |         |
| gb | DP001174 | gnl | NISC-CON | sparrow_T213_2M | 5485635 | 5485734 | 240 | N | 100        | fragment | yes    |   |         |
| gb | DP001174 | gnl | NISC-CON | sparrow_T213_2M | 5485735 | 5497366 | 241 | D | AC236604.2 | 136493   | 148124 | + |         |
| gb | DP001174 | gnl | NISC-CON | sparrow_T213_2M | 5497367 | 5497466 | 242 | N | 100        | fragment | yes    |   |         |
| gb | DP001174 | gnl | NISC-CON | sparrow_T213_2M | 5497467 | 5499560 | 243 | D | AC236604.2 | 148225   | 150318 | + | 34.0 Mb |
| gb | DP001174 | gnl | NISC-CON | sparrow_T213_2M | 5499561 | 5549560 | 244 | N | 50000      | clone    | yes    |   |         |
| gb | DP001174 | gnl | NISC-CON | sparrow_T213_2M | 5549561 | 5553481 | 245 | D | AC235708.2 | 1        | 3921   | + | 39.6 Mb |
| gb | DP001174 | gnl | NISC-CON | sparrow_T213_2M | 5553482 | 5553581 | 246 | N | 100        | fragment | yes    |   |         |
| gb | DP001174 | gnl | NISC-CON | sparrow_T213_2M | 5553582 | 5557796 | 247 | D | AC235708.2 | 4022     | 38236  | + |         |
| gb | DP001174 | gnl | NISC-CON | sparrow_T213_2M | 5557797 | 5587896 | 248 | N | 100        | fragment | yes    |   |         |
| gb | DP001174 | gnl | NISC-CON | sparrow_T213_2M | 5587897 | 5682540 | 249 | D | AC235708.2 | 38337    | 132980 | + |         |
| gb | DP001174 | gnl | NISC-CON | sparrow_T213_2M | 5682541 | 5682640 | 250 | N | 100        | fragment | yes    |   |         |
| gb | DP001174 | gnl | NISC-CON | sparrow_T213_2M | 5682641 | 5682643 | 251 | D | AC235708.2 | 133081   | 133083 | + |         |
| gb | DP001174 | gnl | NISC-CON | sparrow_T213_2M | 5682644 | 5716600 | 252 | D | AC236860.2 | 6111     | 40067  | + |         |
| gb | DP001174 | gnl | NISC-CON | sparrow_T213_2M | 5716601 | 5716700 | 253 | N | 100        | fragment | yes    |   |         |
| gb | DP001174 | gnl | NISC-CON | sparrow_T213_2M | 5716701 | 5731448 | 254 | D | AC236860.2 | 40168    | 54915  | + |         |
| gb | DP001174 | gnl | NISC-CON | sparrow_T213_2M | 5731449 | 5731548 | 255 | N | 100        | fragment | yes    |   |         |
| gb | DP001174 | gnl | NISC-CON | sparrow_T213_2M | 5731549 | 5826801 | 256 | D | AC236860.2 | 55016    | 150268 | + | 39.9 Mb |
| gb | DP001174 | gnl | NISC-CON | sparrow_T213_2M | 5826802 | 5876801 | 257 | N | 50000      | clone    | yes    |   |         |
| gb | DP001174 | gnl | NISC-CON | sparrow_T213_2M | 5876802 | 5943573 | 258 | D | AC235943.2 | 1        | 66772  | + | 55.9 Mb |
| gb | DP001174 | gnl | NISC-CON | sparrow_T213_2M | 5943574 | 5943673 | 259 | N | 100        | fragment | yes    |   |         |
| gb | DP001174 | gnl | NISC-CON | sparrow_T213_2M | 5943674 | 5946586 | 260 | D | AC235943.2 | 66873    | 69785  | + |         |
| gb | DP001174 | gnl | NISC-CON | sparrow_T213_2M | 5946587 | 5946686 | 261 | N | 100        | fragment | yes    |   |         |
| gb | DP001174 | gnl | NISC-CON | sparrow_T213_2M | 5946687 | 5949377 | 262 | D | AC235943.2 | 69886    | 72576  | + |         |
| gb | DP001174 | gnl | NISC-CON | sparrow_T213_2M | 5949378 | 5949477 | 263 | N | 100        | fragment | yes    |   |         |
| gb | DP001174 | gnl | NISC-CON | sparrow_T213_2M | 5949478 | 6034743 | 264 | D | AC235943.2 | 72677    | 157942 | + | 56.0 Mb |
| gb | DP001174 | gnl | NISC-CON | sparrow_T213_2M | 6034744 | 6084743 | 265 | N | 50000      | clone    | yes    |   |         |
| gb | DP001174 | gnl | NISC-CON | sparrow_T213_2M | 6084744 | 6256342 | 266 | D | AC236254.2 | 1        | 171599 | + | 56.2 Mb |
| gb | DP001174 | gnl | NISC-CON | sparrow_T213_2M | 6256343 | 6295602 | 267 | D | AC237422.2 | 96291    | 135550 | + |         |
| gb | DP001174 | gnl | NISC-CON | sparrow_T213_2M | 6295603 | 6295702 | 268 | N | 100        | fragment | yes    |   |         |
| gb | DP001174 | gnl | NISC-CON | sparrow_T213_2M | 6295703 | 6312489 | 269 | D | AC237422.2 | 135651   | 152437 | + |         |
| gb | DP001174 | gnl | NISC-CON | sparrow_T213_2M | 6312490 | 6312589 | 270 | N | 100        | fragment | yes    |   |         |
| gb | DP001174 | gnl | NISC-CON | sparrow_T213_2M | 6312590 | 6332855 | 271 | D | AC237422.2 | 152538   | 172803 | + | 56.5 Mb |
| gb | DP001174 | gnl | NISC-CON | sparrow_T213_2M | 6332856 | 6382855 | 272 | N | 50000      | clone    | yes    |   |         |
| gb | DP001174 | gnl | NISC-CON | sparrow_T213_2M | 6382856 | 6514116 | 273 | D | AC235588.2 | 1        | 131261 | + | 66.0 Mb |
| gb | DP001174 | gnl | NISC-CON | sparrow_T213_2M | 6514117 | 6514216 | 274 | N | 100        | fragment | yes    |   |         |

|    |          |     |          |                 |         |         |     |   |            |          |        |   |                           |
|----|----------|-----|----------|-----------------|---------|---------|-----|---|------------|----------|--------|---|---------------------------|
| gb | DP001174 | gnl | NISC-CON | sparrow_T213_2M | 6514217 | 6531419 | 275 | D | AC235588.2 | 131362   | 148564 | + |                           |
| gb | DP001174 | gnl | NISC-CON | sparrow_T213_2M | 6531420 | 6581419 | 276 | N | 50000      | clone    | yes    |   |                           |
| gb | DP001174 | gnl | NISC-CON | sparrow_T213_2M | 6581420 | 6654809 | 277 | D | AC235715.2 | 1        | 73390  | + | 69.6 Mb                   |
| gb | DP001174 | gnl | NISC-CON | sparrow_T213_2M | 6654810 | 6654909 | 278 | N | 100        | fragment | yes    |   |                           |
| gb | DP001174 | gnl | NISC-CON | sparrow_T213_2M | 6654910 | 6735385 | 279 | D | AC235715.2 | 73491    | 153966 | + |                           |
| gb | DP001174 | gnl | NISC-CON | sparrow_T213_2M | 6735386 | 6746152 | 280 | D | AC235779.2 | 1        | 10767  | + |                           |
| gb | DP001174 | gnl | NISC-CON | sparrow_T213_2M | 6746153 | 6746252 | 281 | N | 100        | fragment | yes    |   |                           |
| gb | DP001174 | gnl | NISC-CON | sparrow_T213_2M | 6746253 | 6755870 | 282 | D | AC235779.2 | 10868    | 20485  | + |                           |
| gb | DP001174 | gnl | NISC-CON | sparrow_T213_2M | 6755871 | 6755970 | 283 | N | 100        | fragment | yes    |   |                           |
| gb | DP001174 | gnl | NISC-CON | sparrow_T213_2M | 6755971 | 6784045 | 284 | D | AC235779.2 | 20586    | 48660  | + |                           |
| gb | DP001174 | gnl | NISC-CON | sparrow_T213_2M | 6784046 | 6784145 | 285 | N | 100        | fragment | yes    |   |                           |
| gb | DP001174 | gnl | NISC-CON | sparrow_T213_2M | 6784146 | 6815358 | 286 | D | AC235779.2 | 48761    | 79973  | + |                           |
| gb | DP001174 | gnl | NISC-CON | sparrow_T213_2M | 6815359 | 6859094 | 287 | D | AC237270.2 | 1        | 43736  | + |                           |
| gb | DP001174 | gnl | NISC-CON | sparrow_T213_2M | 6859095 | 6859194 | 288 | N | 100        | fragment | yes    |   |                           |
| gb | DP001174 | gnl | NISC-CON | sparrow_T213_2M | 6859195 | 6903576 | 289 | D | AC237270.2 | 43837    | 88218  | + |                           |
| gb | DP001174 | gnl | NISC-CON | sparrow_T213_2M | 6903577 | 6903676 | 290 | N | 100        | fragment | yes    |   |                           |
| gb | DP001174 | gnl | NISC-CON | sparrow_T213_2M | 6903677 | 6968369 | 291 | D | AC237270.2 | 88319    | 153011 | + | 70.0 Mb                   |
| gb | DP001174 | gnl | NISC-CON | sparrow_T213_2M | 6968370 | 7018369 | 292 | N | 50000      | clone    | yes    |   |                           |
| gb | DP001174 | gnl | NISC-CON | sparrow_T213_2M | 7018370 | 7062270 | 293 | D | AC235710.2 | 1        | 43901  | + | 70.0 Mb                   |
| gb | DP001174 | gnl | NISC-CON | sparrow_T213_2M | 7062271 | 7062370 | 294 | N | 100        | fragment | yes    |   |                           |
| gb | DP001174 | gnl | NISC-CON | sparrow_T213_2M | 7062371 | 7095761 | 295 | D | AC235710.2 | 44002    | 77392  | + |                           |
| gb | DP001174 | gnl | NISC-CON | sparrow_T213_2M | 7095762 | 7095861 | 296 | N | 100        | fragment | yes    |   |                           |
| gb | DP001174 | gnl | NISC-CON | sparrow_T213_2M | 7095862 | 7132255 | 297 | D | AC235710.2 | 77493    | 113886 | + |                           |
| gb | DP001174 | gnl | NISC-CON | sparrow_T213_2M | 7132256 | 7132355 | 298 | N | 100        | fragment | yes    |   |                           |
| gb | DP001174 | gnl | NISC-CON | sparrow_T213_2M | 7132356 | 7159231 | 299 | D | AC235710.2 | 113987   | 140862 | + |                           |
| gb | DP001174 | gnl | NISC-CON | sparrow_T213_2M | 7159232 | 7234626 | 300 | D | AC235776.2 | 1        | 75395  | + |                           |
| gb | DP001174 | gnl | NISC-CON | sparrow_T213_2M | 7234627 | 7234726 | 301 | N | 100        | fragment | yes    |   |                           |
| gb | DP001174 | gnl | NISC-CON | sparrow_T213_2M | 7234727 | 7282640 | 302 | D | AC235776.2 | 75496    | 123409 | + | 70.3 Mb, 7260156^7260157, |
|    |          |     |          |                 |         |         |     |   |            |          |        |   | 108.3 Mb                  |
| gb | DP001174 | gnl | NISC-CON | sparrow_T213_2M | 7282641 | 7282740 | 303 | N | 100        | fragment | yes    |   |                           |
| gb | DP001174 | gnl | NISC-CON | sparrow_T213_2M | 7282741 | 7327239 | 304 | D | AC235776.2 | 123510   | 168008 | + | 108.3 Mb                  |
| gb | DP001174 | gnl | NISC-CON | sparrow_T213_2M | 7327240 | 7377239 | 305 | N | 50000      | clone    | yes    |   |                           |
| gb | DP001174 | gnl | NISC-CON | sparrow_T213_2M | 7377240 | 7410406 | 306 | D | AC235777.2 | 118760   | 151926 | - | 108.3 Mb                  |
| gb | DP001174 | gnl | NISC-CON | sparrow_T213_2M | 7410407 | 7410506 | 307 | N | 100        | fragment | yes    |   |                           |
| gb | DP001174 | gnl | NISC-CON | sparrow_T213_2M | 7410507 | 7467795 | 308 | D | AC235777.2 | 61371    | 118659 | - |                           |
| gb | DP001174 | gnl | NISC-CON | sparrow_T213_2M | 7467796 | 7467895 | 309 | N | 100        | fragment | yes    |   |                           |
| gb | DP001174 | gnl | NISC-CON | sparrow_T213_2M | 7467896 | 7529165 | 310 | D | AC235777.2 | 1        | 61270  | - |                           |
| gb | DP001174 | gnl | NISC-CON | sparrow_T213_2M | 7529166 | 7542674 | 311 | D | AC236858.3 | 115739   | 129247 | - |                           |
| gb | DP001174 | gnl | NISC-CON | sparrow_T213_2M | 7542675 | 7542774 | 312 | N | 100        | fragment | yes    |   |                           |
| gb | DP001174 | gnl | NISC-CON | sparrow_T213_2M | 7542775 | 7545726 | 313 | D | AC236858.3 | 112687   | 115638 | - |                           |
| gb | DP001174 | gnl | NISC-CON | sparrow_T213_2M | 7545727 | 7545826 | 314 | N | 100        | fragment | yes    |   |                           |
| gb | DP001174 | gnl | NISC-CON | sparrow_T213_2M | 7545827 | 7556683 | 315 | D | AC236858.3 | 101730   | 112586 | - |                           |
| gb | DP001174 | gnl | NISC-CON | sparrow_T213_2M | 7556684 | 7556783 | 316 | N | 100        | fragment | yes    |   |                           |
| gb | DP001174 | gnl | NISC-CON | sparrow_T213_2M | 7556784 | 7589983 | 317 | D | AC236858.3 | 68430    | 101629 | - |                           |
| gb | DP001174 | gnl | NISC-CON | sparrow_T213_2M | 7589984 | 7590083 | 318 | N | 100        | fragment | yes    |   |                           |
| gb | DP001174 | gnl | NISC-CON | sparrow_T213_2M | 7590084 | 7602177 | 319 | D | AC236858.3 | 56236    | 68329  | - |                           |
| gb | DP001174 | gnl | NISC-CON | sparrow_T213_2M | 7602178 | 7602277 | 320 | N | 100        | fragment | yes    |   |                           |
| gb | DP001174 | gnl | NISC-CON | sparrow_T213_2M | 7602278 | 7658412 | 321 | D | AC236858.3 | 1        | 56135  | - |                           |
| gb | DP001174 | gnl | NISC-CON | sparrow_T213_2M | 7658413 | 7715229 | 322 | D | AC235929.2 | 71574    | 128390 | - |                           |
| gb | DP001174 | gnl | NISC-CON | sparrow_T213_2M | 7715230 | 7715329 | 323 | N | 100        | fragment | yes    |   |                           |
| gb | DP001174 | gnl | NISC-CON | sparrow_T213_2M | 7715330 | 7755621 | 324 | D | AC235929.2 | 31182    | 71473  | - |                           |

|    |          |     |          |                 |         |         |     |   |            |          |        |   |          |
|----|----------|-----|----------|-----------------|---------|---------|-----|---|------------|----------|--------|---|----------|
| gb | DP001174 | gnl | NISC-CON | sparrow_T213_2M | 7755622 | 7755639 | 325 | D | AC236809.2 | 124259   | 124276 | - |          |
| gb | DP001174 | gnl | NISC-CON | sparrow_T213_2M | 7755640 | 7755739 | 326 | N | 100        | fragment | yes    |   |          |
| gb | DP001174 | gnl | NISC-CON | sparrow_T213_2M | 7755740 | 7762898 | 327 | D | AC235929.2 | 23922    | 31080  | - |          |
| gb | DP001174 | gnl | NISC-CON | sparrow_T213_2M | 7762899 | 7762998 | 328 | N | 100        | fragment | yes    |   |          |
| gb | DP001174 | gnl | NISC-CON | sparrow_T213_2M | 7762999 | 7766885 | 329 | D | AC235929.2 | 19935    | 23821  | - |          |
| gb | DP001174 | gnl | NISC-CON | sparrow_T213_2M | 7766886 | 7766985 | 330 | N | 100        | fragment | yes    |   |          |
| gb | DP001174 | gnl | NISC-CON | sparrow_T213_2M | 7766986 | 7769787 | 331 | D | AC235929.2 | 17033    | 19834  | - |          |
| gb | DP001174 | gnl | NISC-CON | sparrow_T213_2M | 7769788 | 7804855 | 332 | D | AC236809.2 | 81101    | 116168 | - |          |
| gb | DP001174 | gnl | NISC-CON | sparrow_T213_2M | 7804856 | 7804955 | 333 | N | 100        | fragment | yes    |   |          |
| gb | DP001174 | gnl | NISC-CON | sparrow_T213_2M | 7804956 | 7831331 | 334 | D | AC236809.2 | 54625    | 81000  | - |          |
| gb | DP001174 | gnl | NISC-CON | sparrow_T213_2M | 7831332 | 7831431 | 335 | N | 100        | fragment | yes    |   |          |
| gb | DP001174 | gnl | NISC-CON | sparrow_T213_2M | 7831432 | 7858227 | 336 | D | AC236809.2 | 27729    | 54524  | - |          |
| gb | DP001174 | gnl | NISC-CON | sparrow_T213_2M | 7858228 | 7858327 | 337 | N | 100        | fragment | yes    |   |          |
| gb | DP001174 | gnl | NISC-CON | sparrow_T213_2M | 7858328 | 7885955 | 338 | D | AC236809.2 | 1        | 27628  | - | 107.7 Mb |
| gb | DP001174 | gnl | NISC-CON | sparrow_T213_2M | 7885956 | 7935955 | 339 | N | 50000      | clone    | yes    |   |          |
| gb | DP001174 | gnl | NISC-CON | sparrow_T213_2M | 7935956 | 7943642 | 340 | D | AC236248.2 | 162267   | 169953 | - | 107.3 Mb |
| gb | DP001174 | gnl | NISC-CON | sparrow_T213_2M | 7943643 | 7943742 | 341 | N | 100        | fragment | yes    |   |          |
| gb | DP001174 | gnl | NISC-CON | sparrow_T213_2M | 7943743 | 7969071 | 342 | D | AC236248.2 | 136838   | 162166 | - |          |
| gb | DP001174 | gnl | NISC-CON | sparrow_T213_2M | 7969072 | 7969171 | 343 | N | 100        | fragment | yes    |   |          |
| gb | DP001174 | gnl | NISC-CON | sparrow_T213_2M | 7969172 | 8028764 | 344 | D | AC236248.2 | 77145    | 136737 | - |          |
| gb | DP001174 | gnl | NISC-CON | sparrow_T213_2M | 8028765 | 8028864 | 345 | N | 100        | fragment | yes    |   |          |
| gb | DP001174 | gnl | NISC-CON | sparrow_T213_2M | 8028865 | 8105908 | 346 | D | AC236248.2 | 1        | 77044  | - |          |
| gb | DP001174 | gnl | NISC-CON | sparrow_T213_2M | 8105909 | 8110527 | 347 | D | AC235996.2 | 118233   | 122851 | - |          |
| gb | DP001174 | gnl | NISC-CON | sparrow_T213_2M | 8110528 | 8110627 | 348 | N | 100        | fragment | yes    |   |          |
| gb | DP001174 | gnl | NISC-CON | sparrow_T213_2M | 8110628 | 8113739 | 349 | D | AC235996.2 | 115021   | 118132 | - |          |
| gb | DP001174 | gnl | NISC-CON | sparrow_T213_2M | 8113740 | 8113839 | 350 | N | 100        | fragment | yes    |   |          |
| gb | DP001174 | gnl | NISC-CON | sparrow_T213_2M | 8113840 | 8120272 | 351 | D | AC235996.2 | 108488   | 114920 | - |          |
| gb | DP001174 | gnl | NISC-CON | sparrow_T213_2M | 8120273 | 8120372 | 352 | N | 100        | fragment | yes    |   |          |
| gb | DP001174 | gnl | NISC-CON | sparrow_T213_2M | 8120373 | 8132809 | 353 | D | AC235996.2 | 95951    | 108387 | - |          |
| gb | DP001174 | gnl | NISC-CON | sparrow_T213_2M | 8132810 | 8132909 | 354 | N | 100        | fragment | yes    |   |          |
| gb | DP001174 | gnl | NISC-CON | sparrow_T213_2M | 8132910 | 8175282 | 355 | D | AC235996.2 | 53478    | 95850  | - |          |
| gb | DP001174 | gnl | NISC-CON | sparrow_T213_2M | 8175283 | 8175382 | 356 | N | 100        | fragment | yes    |   |          |
| gb | DP001174 | gnl | NISC-CON | sparrow_T213_2M | 8175383 | 8187272 | 357 | D | AC235996.2 | 41488    | 53377  | - |          |
| gb | DP001174 | gnl | NISC-CON | sparrow_T213_2M | 8187273 | 8187372 | 358 | N | 100        | fragment | yes    |   |          |
| gb | DP001174 | gnl | NISC-CON | sparrow_T213_2M | 8187373 | 8218108 | 359 | D | AC235996.2 | 10652    | 41387  | - |          |
| gb | DP001174 | gnl | NISC-CON | sparrow_T213_2M | 8218109 | 8218208 | 360 | N | 100        | fragment | yes    |   |          |
| gb | DP001174 | gnl | NISC-CON | sparrow_T213_2M | 8218209 | 8224867 | 361 | D | AC235996.2 | 3893     | 10551  | - |          |
| gb | DP001174 | gnl | NISC-CON | sparrow_T213_2M | 8224868 | 8224967 | 362 | N | 100        | fragment | yes    |   |          |
| gb | DP001174 | gnl | NISC-CON | sparrow_T213_2M | 8224968 | 8228759 | 363 | D | AC235996.2 | 1        | 3792   | - | 107.0 Mb |
| gb | DP001174 | gnl | NISC-CON | sparrow_T213_2M | 8228760 | 8228759 | 364 | N | 50000      | clone    | yes    |   |          |
| gb | DP001174 | gnl | NISC-CON | sparrow_T213_2M | 8228760 | 8425304 | 365 | D | AC235709.2 | 20004    | 166548 | - | 99.8 Mb  |
| gb | DP001174 | gnl | NISC-CON | sparrow_T213_2M | 8425305 | 8425404 | 366 | N | 100        | fragment | yes    |   |          |
| gb | DP001174 | gnl | NISC-CON | sparrow_T213_2M | 8425405 | 8427769 | 367 | D | AC235709.2 | 17539    | 19903  | - |          |
| gb | DP001174 | gnl | NISC-CON | sparrow_T213_2M | 8427770 | 8427869 | 368 | N | 100        | fragment | yes    |   |          |
| gb | DP001174 | gnl | NISC-CON | sparrow_T213_2M | 8427870 | 8445307 | 369 | D | AC235709.2 | 1        | 17438  | - | 99.6 Mb  |
| gb | DP001174 | gnl | NISC-CON | sparrow_T213_2M | 8445308 | 8495307 | 370 | N | 50000      | clone    | yes    |   |          |
| gb | DP001174 | gnl | NISC-CON | sparrow_T213_2M | 8495308 | 8509828 | 371 | D | AC236557.2 | 136766   | 151286 | - | 99.6 Mb  |
| gb | DP001174 | gnl | NISC-CON | sparrow_T213_2M | 8509829 | 8509928 | 372 | N | 100        | fragment | yes    |   |          |
| gb | DP001174 | gnl | NISC-CON | sparrow_T213_2M | 8509929 | 8519613 | 373 | D | AC236557.2 | 126981   | 136665 | - |          |
| gb | DP001174 | gnl | NISC-CON | sparrow_T213_2M | 8519614 | 8519713 | 374 | N | 100        | fragment | yes    |   |          |
| gb | DP001174 | gnl | NISC-CON | sparrow_T213_2M | 8519714 | 8530755 | 375 | D | AC236557.2 | 115839   | 126880 | - |          |

|    |          |     |          |                 |         |         |     |   |            |          |        |   |
|----|----------|-----|----------|-----------------|---------|---------|-----|---|------------|----------|--------|---|
| gb | DP001174 | gnl | NISC-CON | sparrow_T213_2M | 8530756 | 8530855 | 376 | N | 100        | fragment | yes    |   |
| gb | DP001174 | gnl | NISC-CON | sparrow_T213_2M | 8530856 | 8557474 | 377 | D | AC236557.2 | 89120    | 115738 | - |
| gb | DP001174 | gnl | NISC-CON | sparrow_T213_2M | 8557475 | 8557574 | 378 | N | 100        | fragment | yes    |   |
| gb | DP001174 | gnl | NISC-CON | sparrow_T213_2M | 8557575 | 8646593 | 379 | D | AC236557.2 | 1        | 89019  | - |
| gb | DP001174 | gnl | NISC-CON | sparrow_T213_2M | 8646594 | 8696593 | 380 | N | 50000      | clone    | yes    |   |
| gb | DP001174 | gnl | NISC-CON | sparrow_T213_2M | 8696594 | 8756531 | 381 | D | AC237198.2 | 102278   | 162215 | - |
| gb | DP001174 | gnl | NISC-CON | sparrow_T213_2M | 8756532 | 8756631 | 382 | N | 100        | fragment | yes    |   |
| gb | DP001174 | gnl | NISC-CON | sparrow_T213_2M | 8756632 | 8795433 | 383 | D | AC237198.2 | 63376    | 102177 | - |
| gb | DP001174 | gnl | NISC-CON | sparrow_T213_2M | 8795434 | 8795533 | 384 | N | 100        | fragment | yes    |   |
| gb | DP001174 | gnl | NISC-CON | sparrow_T213_2M | 8795534 | 8835209 | 385 | D | AC237198.2 | 23600    | 63275  | - |
| gb | DP001174 | gnl | NISC-CON | sparrow_T213_2M | 8835210 | 8835309 | 386 | N | 100        | fragment | yes    |   |
| gb | DP001174 | gnl | NISC-CON | sparrow_T213_2M | 8835310 | 8858808 | 387 | D | AC237198.2 | 1        | 23499  | - |

99.2 Mb
