# Supplementary material
Source: PubMed Central journal article supplement (PMC3113616)
Supplement: supp_esr043_SupplementaryTable1v3.pdf [file supp_esr043_SupplementaryTable1v3.pdf]

**Supplementary Table 1. Summary of FISH probes and mapping.**

| Clone name | Library   | Orthologous position in the zebra finch genome*     | GenBank accession or TI # | ZAL2         | ZAL2M      |
|------------|-----------|-----------------------------------------------------|---------------------------|--------------|------------|
| 297B14     | TGMCBa    | chr3:164,019-304,807                                | 1874389138, 1877213243    | centromere   | centromere |
| 140L08     | TGMCBa    | chr3:4,723,480-4,854,756                            | 1874672486, 1874679763    | p-arm        | p-arm      |
| 77A01**    | TG_Ba     | chr3:8,937,745-                                     | 908596257                 | q-arm        | q-arm      |
| 56A01**    | TG_Ba     | chr3:10,302,904-10,437,399                          | 908596251, 908596265      | q-arm        | q-arm      |
| 173L23     | TGMCBa    | chr3:15,123,246-15,319,325                          | 1876907291, 1876898114    | q-arm        | q-arm      |
| 94A01**    | TG_Ba     | chr3:20,584,215-20,727,192                          | 908596146, 908596196      | p-arm        | p-arm      |
| 182O02     | TGMCBa    | chr3:23,927,627-24,060,240                          | 1856371955, 1856378681    | p-arm        | p-arm      |
| 193N07     | TGMCBa    | chr3:24,060,284-24,191,449                          | 1856375547, 1856377123    | p-arm        | p-arm      |
| 262K17     | CHORI-264 | chr3:24,125,887-24,291,118                          | FI596421, FI596420        | p-arm        | p-arm      |
| 123F24     | CHORI-264 | chr3:24,392,369-24,552,730                          | FI596292, FI596293        | p-arm        | p-arm      |
| 297H09     | TGMCBa    | chr3:26,679,287-26,793,490                          | 1874382409, 1877202929    | p-arm        | p-arm      |
| 347B14     | TGMCBa    | chr3:27,396,201-27,551,570                          | 1864211762, 1870125031    | p-arm        | p-arm      |
| 211J19     | TGMCBa    | chr3:27,699,459-27,845,517                          | 1922679860, 1861446857    | p-arm        | p-arm      |
| 217G15     | TGMCBa    | chr3:27,899,827-28,044,970                          | 1922682902, 1861445578    | p-arm        | p-arm      |
| 156C22**   | TGMCBa    | chr3:29,410,654-29,554,925                          | 1290207524, 1290207824    | p-arm        | p-arm      |
| 250N04     | CHORI-264 | chr3:33,893,969-34,016,333                          | FI592812, FI592813        | q-arm        | q-arm      |
| 300O4**    | TG_Ba     | chr3:39,645,123-39,781,205                          | AC154073.2                | q-arm        | q-arm      |
| 13A01**    | TG_Ba     | chr3:47,291,914-47,411,978                          | 908596236, 908596109      | q-arm        | q-arm      |
| 134P12     | CHORI-264 | chr3:56,089,082-56,238,448                          | FI593437, FI593436        | q-arm        | q-arm      |
| 21H11**    | TGMCBa    | chr3:61,388,963-61,558,045                          | 1277186752, 1277186958    | q-arm        | q-arm      |
| 352K13**   | TG_Ba     | chr3:61,967,954-61,972,436                          | n.a.                      | q-arm        | q-arm      |
| 91E01**    | TGMCBa    | chr3:65,952,224-66,079,504                          | 1277187221, 1277187497    | q-arm        | q-arm      |
| 369N22     | TGMCBa    | chr3:67,786,009-67,923,160                          | 1864209691, 1864208155    | q-arm        | q-arm      |
| 340K05     | TGMCBa    | chr3:69,512,595-69,652,410                          | 1877211565, 1876900573    | q-arm        | q-arm      |
| 168I11     | TGMCBa    | chr3:69,609,668-69,765,827                          | 1813135609, 1813139718    | q-arm        | q-arm      |
| 353A16     | TGMCBa    | chr3:69,699,319-69,846,404                          | 1874384547, 1876895097    | q-arm        | q-arm      |
| 18P12      | TGMCBa    | chr3:69,853,733-69,986,803                          | 1883516069, 1883518119    | q-arm        | q-arm      |
| 063M06***  | CHORI-264 | chr3:70,179,860-70,180,398, 108,264,948-108,265,660 | FI594040, FI594041        | q-arm        | q-arm      |
| 060N14***  | CHORI-264 | chr3:70,281,419-70,282,341, 108,370,693-108,370,952 | FI596204, FI596205        | p-arm        | p-arm      |
| 143F23     | TGMCBa    | chr3:70,6512,55-70,759,502                          | 1916838414, 1813137015    | p-arm        | p-arm      |
| 120H07**   | TGMCBa    | chr3:70,773,591-70,924,763                          | 1290206795, 1290207123    | p-arm        | p-arm      |
| 321F19     | CHORI-264 | chr3:71,294,142-71,443,061                          | FI593519, FI593520        | p- and q-arm | p-arm      |
| 516O05     | CHORI-264 | chr3:71,321,392-71,468,248                          | FI593982, FI593983        | p- and q-arm | p-arm      |
| 309M10     | TGMCBa    | chr3:71,389,158-71,525,060                          | 1874388649, 1874681325    | p- and q-arm | p-arm      |
| 393K07     | CHORI-264 | chr3:71,414,167-71,560,750                          | FI594164, FI594163        | p- and q-arm | p-arm      |

|          |           |                              |                        |       |       |
|----------|-----------|------------------------------|------------------------|-------|-------|
| 345H01   | CHORI-264 | chr3:71,488,503-71,628,527   | FI593721,FI593720      | q-arm | p-arm |
| 289F19   | TGMCBa    | chr3:72,972,181-73,116,346   | 1925270444, 1887701181 | q-arm | p-arm |
| 360K17   | TGMCBa    | chr3:75,547,309-75,663,917   | 1877202688, 1876896798 | q-arm | p-arm |
| 64A01**  | TG_Ba     | chr3:78,724,313-78,843,809   | 908596166, 908596247   | q-arm | p-arm |
| 71A01**  | TG_Ba     | chr3:81,966,117-82,080,690   | 908596264, 908596235   | q-arm | p-arm |
| 5K13**   | TG_Ba     | chr3:90,507,078-90,508,264   | n.a.                   | q-arm | p-arm |
| 57J12    | TGMCBa    | chr3:91,350,896-91,473,582   | 1874387425, 1876893840 | q-arm | p-arm |
| 83G17    | TGMCBa    | chr3:93,898,132-94,055,102   | 1887564249, 1887673423 | q-arm | p-arm |
| 71J02    | TGMCBa    | chr3:96,908,245-97,078,000   | 1889559939, 1887582378 | q-arm | p-arm |
| 328M16   | TGMCBa    | chr3:97,878,058-98,000,878   | 1864212479, 1864208517 | q-arm | p-arm |
| 63J19    | TGMCBa    | chr3:98,303,987-98,426,416   | 1864198974, 1864198412 | q-arm | p-arm |
| 303D07   | TGMCBa    | chr3:98,788,065-98,942,209   | 1874669373, 1874671030 | q-arm | p-arm |
| 159F19   | CHORI-264 | chr3:98,919,011-99,081,613   | FI594700, FI594699     | q-arm | p-arm |
| 400C13   | CHORI-264 | chr3:99,187,133-99,340,937   | FI596254, FI596255     | q-arm | q-arm |
| 106J15   | TGMCBa    | chr3:99,737,315-99,909,020   | 1712399927, 1712404705 | q-arm | q-arm |
| 55A01**  | TG_Ba     | chr3:101,686,984-101,826,796 | 908596203, 908596220   | q-arm | q-arm |
| 29M23    | TGMCBa    | chr3:104,000,510-104,158,215 | 1864198543, 1864199106 | q-arm | q-arm |
| 277O03   | TGMCBa    | chr3:105,977,598-106,123,295 | 1925267977, 1877711038 | q-arm | q-arm |
| 159B09   | TGMCBa    | chr3:106,949,395-107,079,764 | 1923803285, 1815752090 | q-arm | q-arm |
| 258I11** | TG_Ba     | chr3:108,824,262-108,969,467 | AC159936.2             | p-arm | p-arm |
| 232I20   | TGMCBa    | chr3:110,977,131-111,143,005 | 1889559183, 1883525914 | p-arm | p-arm |
| 193L22   | TGMCBa    | chr3:112,089,276-112,427,106 | 1815752926, 1813134367 | p-arm | p-arm |
| 24I15    | TGMCBa    | chr3_random:115,851-272,249  | 1856888724, 1856372879 | p-arm | p-arm |

\*The orthologous positions of the zebra finch BAC clones in the chicken genome were based on alignments of zebra finch complete BAC, or BAC-end sequences to the chicken genome assembly (taeGut1). In the case of clones 352K13 and 5K13, the orthologous position was estimated based on the location of the hybridization probes used to identify those BACs.

\*\*Previously published mapped BAC clones (Thomas et al, 2008).

\*\*\*Previously published mapped BAC clones (Davis et al, 2010)

n.a. = not available.
