# Supplementary material
Source: PubMed Central journal article supplement (PMC3113616)
Supplement: supp_esr043_SupplementaryTable2v2.pdf [file supp_esr043_SupplementaryTable2v2.pdf]

Supplementary Table 2. Concordant white-throated sparrow BAC clones relative to zebra finch genome (taeGut1).

| Clone Name   | Position in zebra finch genome | GenBank Ac#s      | Distance between left and right BES (bp) |
|--------------|--------------------------------|-------------------|------------------------------------------|
| CH264-069M12 | Chr3_random:112781-267710      | FI594053,FI594052 | 154929                                   |
| CH264-408O05 | Chr3_random:114446-252887      | FI594564,FI594563 | 138441                                   |
| CH264-526B14 | Chr3_random:123980-258157      | FI595466,FI595465 | 134177                                   |
| CH264-510O23 | Chr3_random:472238-622593      | FI595282,FI595281 | 150355                                   |
| CH264-005I09 | Chr3_random:472262-622421      | FI593578,FI593577 | 150159                                   |
| CH264-110D06 | Chr3:19692981-19863058         | FI593241,FI593240 | 170077                                   |
| CH264-095P08 | Chr3:19792021-19960714         | FI593076,FI593075 | 168693                                   |
| CH264-518D22 | Chr3:19792121-19948334         | FI593986,FI593987 | 156213                                   |
| CH264-370N20 | Chr3:19792356-19948425         | FI593918,FI593919 | 156069                                   |
| CH264-379O08 | Chr3:19809446-19946646         | FI594026,FI594027 | 137200                                   |
| CH264-069E07 | Chr3:19817506-19970191         | FI592777,FI592776 | 152685                                   |
| CH264-393J20 | Chr3:21504521-21658944         | FI594160,FI594159 | 154423                                   |
| CH264-415P04 | Chr3:21504523-21667678         | FI593637,FI593636 | 163155                                   |
| CH264-212A09 | Chr3:21546589-21704389         | FI593302,FI593303 | 157800                                   |
| CH264-418D09 | Chr3:21546589-21698175         | FI593656,FI593657 | 151586                                   |
| CH264-292G06 | Chr3:21554326-21715062         | FI593205,FI593204 | 160736                                   |
| CH264-283P08 | Chr3:21566113-21704357         | FI593128,FI593127 | 138244                                   |
| CH264-274O09 | Chr3:21566129-21720780         | FI593016,FI593015 | 154651                                   |
| CH264-404O23 | Chr3:21566129-21698167         | FI593536,FI593535 | 132038                                   |
| CH264-391B03 | Chr3:21572240-21715497         | FI594103,FI594102 | 143257                                   |
| CH264-505M01 | Chr3:21573510-21715032         | FI593862,FI593863 | 141522                                   |
| CH264-247F17 | Chr3:21575946-21726256         | FI593509,FI593508 | 150310                                   |
| CH264-004F16 | Chr3:21576093-21747804         | FI592778,FI592779 | 171711                                   |
| CH264-105P10 | Chr3:21576093-21745366         | FI593176,FI593177 | 169273                                   |
| CH264-071D17 | Chr3:21581576-21724682         | FI592788,FI592789 | 143106                                   |
| CH264-091E14 | Chr3:21584235-21738627         | FI593047,FI593048 | 154392                                   |
| CH264-011A22 | Chr3:21590192-21745376         | FI592875,FI592874 | 155184                                   |
| CH264-452B10 | Chr3:21590192-21726252         | FI594033,FI594032 | 136060                                   |
| CH264-025P18 | Chr3:21590704-21758923         | FI592994,FI592993 | 168219                                   |
| CH264-030M18 | Chr3:21591780-21750092         | FI593062,FI593061 | 158312                                   |
| CH264-085P13 | Chr3:21594846-21747708         | FI592967,FI592968 | 152862                                   |
| CH264-290D19 | Chr3:21594846-21747756         | FI593197,FI593196 | 152910                                   |
| CH264-420I04 | Chr3:21594922-21745366         | FI593715,FI593714 | 150444                                   |
| CH264-081H03 | Chr3:21596327-21750106         | FI592888,FI592889 | 153779                                   |
| CH264-439P20 | Chr3:21596333-21745109         | FI593909,FI593908 | 148776                                   |
| CH264-227E04 | Chr3:21596341-21745118         | FI593407,FI593406 | 148777                                   |
| CH264-153C06 | Chr3:21596473-21726252         | FI592839,FI592838 | 129779                                   |

|              |                        |                   |        |
|--------------|------------------------|-------------------|--------|
| CH264-414O17 | Chr3:21596473-21745377 | FI593625,FI593624 | 148904 |
| CH264-006D14 | Chr3:21598116-21738616 | FI592790,FI592791 | 140500 |
| CH264-097F15 | Chr3:21598116-21747804 | FI593083,FI593084 | 149688 |
| CH264-255L23 | Chr3:21598116-21750106 | FI592840,FI592841 | 151990 |
| CH264-504P23 | Chr3:21598116-21747804 | FI593855,FI593854 | 149688 |
| CH264-396P22 | Chr3:21598117-21747804 | FI594183,FI594184 | 149687 |
| CH264-104A22 | Chr3:21610250-21773099 | FI593169,FI593168 | 162849 |
| CH264-511E21 | Chr3:21615764-21758927 | FI593887,FI593886 | 143163 |
| CH264-010C15 | Chr3:21621852-21773099 | FI592863,FI592862 | 151247 |
| CH264-416K04 | Chr3:21626898-21774171 | FI593649,FI593648 | 147273 |
| CH264-109H10 | Chr3:21626924-21788130 | FI593237,FI593236 | 161206 |
| CH264-523M09 | Chr3:21632994-21778630 | FI594062,FI594063 | 145636 |
| CH264-171G21 | Chr3:21633001-21781623 | FI592997,FI592998 | 148622 |
| CH264-313H01 | Chr3:21633082-21777067 | FI593420,FI593421 | 143985 |
| CH264-424N23 | Chr3:21672503-21836666 | FI593746,FI593747 | 164163 |
| CH264-201E16 | Chr3:21676778-21823657 | FI593218,FI593219 | 146879 |
| CH264-091E02 | Chr3:21682236-21841893 | FI592996,FI592995 | 159657 |
| CH264-484A06 | Chr3:21682314-21831028 | FI593607,FI593606 | 148714 |
| CH264-456N24 | Chr3:21696899-21841893 | FI594108,FI594109 | 144994 |
| CH264-010A07 | Chr3:21710686-21877259 | FI592858,FI592859 | 166573 |
| CH264-513N07 | Chr3:21710686-21875750 | FI593959,FI593958 | 165064 |
| CH264-098N23 | Chr3:21710698-21871417 | FI593147,FI593148 | 160719 |
| CH264-067L04 | Chr3:21710701-21861819 | FI592760,FI592761 | 151118 |
| CH264-016F12 | Chr3:21715087-21873401 | FI592949,FI592950 | 158314 |
| CH264-145K19 | Chr3:21715808-21880319 | FI593472,FI593473 | 164511 |
| CH264-122H15 | Chr3:21720807-21877181 | FI593332,FI593333 | 156374 |
| CH264-326O22 | Chr3:21723391-21873406 | FI593548,FI593547 | 150015 |
| CH264-371B11 | Chr3:21724702-21873403 | FI593923,FI593922 | 148701 |
| CH264-225C13 | Chr3:21726276-21877259 | FI593386,FI593387 | 150983 |
| CH264-082A17 | Chr3:21738661-21896998 | FI592897,FI592896 | 158337 |
| CH264-283N17 | Chr3:21745154-21893442 | FI593120,FI593119 | 148288 |
| CH264-291G24 | Chr3:21745161-21902894 | FI593200,FI593201 | 157733 |
| CH264-276P06 | Chr3:21745384-21892509 | FI593035,FI593036 | 147125 |
| CH264-480O05 | Chr3:21747859-21902894 | FI593584,FI593583 | 155035 |
| CH264-501C08 | Chr3:21758936-21899405 | FI593789,FI593788 | 140469 |
| CH264-273M21 | Chr3:21758941-21925307 | FI593004,FI593003 | 166366 |
| CH264-194J11 | Chr3:21774219-21929804 | FI593207,FI593206 | 155585 |
| CH264-521D13 | Chr3:21776156-21929783 | FI594042,FI594043 | 153627 |
| CH264-155H15 | Chr3:21792691-21945369 | FI592847,FI592846 | 152678 |

|              |                        |                   |        |
|--------------|------------------------|-------------------|--------|
| CH264-311G14 | Chr3:21792691-21954125 | FI593392,FI593393 | 161434 |
| CH264-262K17 | Chr3:24125887-24291118 | FI596421,FI596420 | 165231 |
| CH264-279M14 | Chr3:24139577-24298977 | FI596434,FI596435 | 159400 |
| CH264-456K07 | Chr3:24142549-24300320 | FI596311,FI596310 | 157771 |
| CH264-458G16 | Chr3:24147196-24291118 | FI596318,FI596319 | 143922 |
| CH264-263D10 | Chr3:24147199-24291118 | FI596423,FI596422 | 143919 |
| CH264-388D23 | Chr3:24147215-24298977 | FI596242,FI596243 | 151762 |
| CH264-370B08 | Chr3:24147363-24299687 | FI596211,FI596210 | 152324 |
| CH264-505E05 | Chr3:24156316-24303303 | FI596391,FI596390 | 146987 |
| CH264-203G24 | Chr3:24159861-24333314 | FI596373,FI596372 | 173453 |
| CH264-066I05 | Chr3:24165363-24333314 | FI596216,FI596217 | 167951 |
| CH264-402G16 | Chr3:24165363-24311032 | FI596262,FI596263 | 145669 |
| CH264-371N14 | Chr3:24168277-24333910 | FI596218,FI596219 | 165633 |
| CH264-285A11 | Chr3:24197878-24360264 | FI596446,FI596447 | 162386 |
| CH264-005K09 | Chr3:24203760-24362810 | FI596144,FI596145 | 159050 |
| CH264-283D14 | Chr3:24205370-24378420 | FI596442,FI596443 | 173050 |
| CH264-464J13 | Chr3:24210071-24378420 | FI596330,FI596331 | 168349 |
| CH264-073B14 | Chr3:24223120-24396239 | FI596221,FI596220 | 173119 |
| CH264-101K16 | Chr3:24234858-24407139 | FI596252,FI596253 | 172281 |
| CH264-052H21 | Chr3:24244297-24412105 | FI596184,FI596185 | 167808 |
| CH264-502I01 | Chr3:24269463-24431757 | FI596378,FI596379 | 162294 |
| CH264-370P03 | Chr3:24279509-24427527 | FI596215,FI596214 | 148018 |
| CH264-220I15 | Chr3:24284353-24457372 | FI596393,FI596392 | 173019 |
| CH264-215L11 | Chr3:24287969-24457372 | FI596380,FI596381 | 169403 |
| CH264-351H12 | Chr3:24288975-24443682 | FI596186,FI596187 | 154707 |
| CH264-243G16 | Chr3:24311383-24469807 | FI596409,FI596408 | 158424 |
| CH264-179I23 | Chr3:24344721-24511401 | FI596345,FI596344 | 166680 |
| CH264-280A08 | Chr3:24344721-24511401 | FI596436,FI596437 | 166680 |
| CH264-351C14 | Chr3:24344721-24501642 | FI596183,FI596182 | 156921 |
| CH264-515K11 | Chr3:24344721-24495746 | FI596407,FI596406 | 151025 |
| CH264-510G21 | Chr3:24360579-24529228 | FI596398,FI596399 | 168649 |
| CH264-129M09 | Chr3:24381728-24552730 | FI596296,FI596297 | 171002 |
| CH264-131J22 | Chr3:24381730-24552730 | FI596300,FI596301 | 171000 |
| CH264-280E19 | Chr3:24387414-24552730 | FI596439,FI596438 | 165316 |
| CH264-235P13 | Chr3:24392362-24555517 | FI596400,FI596401 | 163155 |
| CH264-123F24 | Chr3:24392369-24552730 | FI596292,FI596293 | 160361 |
| CH264-450H14 | Chr3:26594509-26768406 | FI594935,FI594936 | 173897 |
| CH264-270F03 | Chr3:26614064-26788285 | FI594895,FI594896 | 174221 |
| CH264-472L22 | Chr3:27866856-28024700 | FI596107,FI596106 | 157844 |

|              |                        |                   |        |
|--------------|------------------------|-------------------|--------|
| CH264-163G06 | Chr3:27866857-28024697 | FI595437,FI595438 | 157840 |
| CH264-471B11 | Chr3:27866857-28026219 | FI596102,FI596103 | 159362 |
| CH264-036L05 | Chr3:27868066-28026007 | FI595299,FI595300 | 157941 |
| CH264-132F19 | Chr3:27872705-28036998 | FI595253,FI595254 | 164293 |
| CH264-492G07 | Chr3:27872705-28026225 | FI595736,FI595737 | 153520 |
| CH264-093K22 | Chr3:27873509-28037010 | FI595612,FI595613 | 163501 |
| CH264-012E23 | Chr3:27875391-28026690 | FI595075,FI595074 | 151299 |
| CH264-277M13 | Chr3:27875391-28022623 | FI595585,FI595584 | 147232 |
| CH264-034K02 | Chr3:27875432-28026007 | FI595283,FI595284 | 150575 |
| CH264-049C06 | Chr3:27876060-28026220 | FI595393,FI595394 | 150160 |
| CH264-096F09 | Chr3:27876060-28026223 | FI595624,FI595625 | 150163 |
| CH264-049A22 | Chr3:27876101-28026219 | FI595389,FI595390 | 150118 |
| CH264-380B05 | Chr3:27876131-28025693 | FI596104,FI596105 | 149562 |
| CH264-498L24 | Chr3:27876736-28024687 | FI595803,FI595804 | 147951 |
| CH264-299D04 | Chr3:27876999-28026225 | FI595704,FI595705 | 149226 |
| CH264-186C04 | Chr3:27883540-28036994 | FI595633,FI595634 | 153454 |
| CH264-364O14 | Chr3:27891948-28038590 | FI596057,FI596056 | 146642 |
| CH264-152M15 | Chr3:27903862-28053784 | FI595402,FI595403 | 149922 |
| CH264-324O17 | Chr3:27907678-28057986 | FI595888,FI595887 | 150308 |
| CH264-010A24 | Chr3:27925080-28082671 | FI595018,FI595017 | 157591 |
| CH264-491L15 | Chr3:27925080-28082666 | FI595733,FI595732 | 157586 |
| CH264-180B14 | Chr3:27930991-28093732 | FI595578,FI595579 | 162741 |
| CH264-206F08 | Chr3:27930998-28089884 | FI595068,FI595067 | 158886 |
| CH264-511G01 | Chr3:27931543-28093705 | FI595878,FI595877 | 162162 |
| CH264-317J11 | Chr3:27934496-28103638 | FI595824,FI595823 | 169142 |
| CH264-137J12 | Chr3:27936254-28106035 | FI595318,FI595317 | 169781 |
| CH264-457J02 | Chr3:27943209-28103638 | FI596047,FI596046 | 160429 |
| CH264-372G15 | Chr3:27943212-28103748 | FI596085,FI596084 | 160536 |
| CH264-042H19 | Chr3:27943264-28103365 | FI595365,FI595366 | 160101 |
| CH264-338I23 | Chr3:27944737-28103638 | FI595931,FI595932 | 158901 |
| CH264-436K05 | Chr3:27944802-28103753 | FI595934,FI595933 | 158951 |
| CH264-416H15 | Chr3:27949947-28111390 | FI595838,FI595837 | 161443 |
| CH264-525H06 | Chr3:27949947-28099907 | FI595942,FI595941 | 149960 |
| CH264-230J06 | Chr3:27951070-28111389 | FI595251,FI595252 | 160319 |
| CH264-356P09 | Chr3:27952725-28103638 | FI596024,FI596025 | 150913 |
| CH264-016G11 | Chr3:27972079-28153495 | FI595103,FI595102 | 181416 |
| CH264-165F15 | Chr3:27972172-28144653 | FI595492,FI595491 | 172481 |
| CH264-446K07 | Chr3:28000046-28168171 | FI595998,FI595999 | 168125 |
| CH264-351I13 | Chr3:28000049-28144653 | FI595989,FI595988 | 144604 |

|              |                        |                   |        |
|--------------|------------------------|-------------------|--------|
| CH264-436A04 | Chr3:28007571-28183509 | FI595929,FI595930 | 175938 |
| CH264-079L16 | Chr3:28015766-28183492 | FI595543,FI595544 | 167726 |
| CH264-143I23 | Chr3:28015766-28182501 | FI595328,FI595327 | 166735 |
| CH264-098G02 | Chr3:28022699-28184354 | FI595026,FI595027 | 161655 |
| CH264-187F21 | Chr3:28022699-28194478 | FI595638,FI595637 | 171779 |
| CH264-211H18 | Chr3:28022705-28182513 | FI595141,FI595142 | 159808 |
| CH264-218N02 | Chr3:28022706-28194455 | FI595227,FI595228 | 171749 |
| CH264-334O17 | Chr3:28024839-28184354 | FI595915,FI595916 | 159515 |
| CH264-025F17 | Chr3:28026496-28182506 | FI595181,FI595182 | 156010 |
| CH264-351H24 | Chr3:28026496-28183501 | FI595985,FI595984 | 157005 |
| CH264-367E21 | Chr3:28026771-28207430 | FI596068,FI596069 | 180659 |
| CH264-164P16 | Chr3:28026785-28195232 | FI595484,FI595483 | 168447 |
| CH264-082C23 | Chr3:28026790-28212007 | FI595550,FI595549 | 185217 |
| CH264-223K19 | Chr3:28026790-28184754 | FI595244,FI595243 | 157964 |
| CH264-373A09 | Chr3:28026790-28185896 | FI596088,FI596089 | 159106 |
| CH264-439P08 | Chr3:28034689-28211940 | FI595966,FI595967 | 177251 |
| CH264-296N11 | Chr3:28043273-28211267 | FI595692,FI595693 | 167994 |
| CH264-450A08 | Chr3:28045291-28202391 | FI596018,FI596019 | 157100 |
| CH264-288C03 | Chr3:28058426-28228868 | FI595655,FI595656 | 170442 |
| CH264-034J12 | Chr3:28083288-28242613 | FI595280,FI595279 | 159325 |
| CH264-123C12 | Chr3:28090230-28241841 | FI595155,FI595156 | 151611 |
| CH264-264A17 | Chr3:28090230-28236676 | FI595509,FI595510 | 146446 |
| CH264-369C23 | Chr3:28090230-28241842 | FI596072,FI596073 | 151612 |
| CH264-385G17 | Chr3:28090230-28240282 | FI596125,FI596124 | 150052 |
| CH264-449C01 | Chr3:28090230-28242589 | FI596011,FI596010 | 152359 |
| CH264-358G11 | Chr3:28093465-28240725 | FI596036,FI596037 | 147260 |
| CH264-303L05 | Chr3:28093470-28249537 | FI595759,FI595760 | 156067 |
| CH264-194P22 | Chr3:28093820-28228868 | FI595662,FI595661 | 135048 |
| CH264-339J01 | Chr3:28093820-28241854 | FI595956,FI595957 | 148034 |
| CH264-398D14 | Chr3:28093820-28255494 | FI595746,FI595745 | 161674 |
| CH264-190M15 | Chr3:28103679-28269007 | FI595646,FI595645 | 165328 |
| CH264-108C05 | Chr3:28106090-28255494 | FI595062,FI595061 | 149404 |
| CH264-262P02 | Chr3:28111398-28254435 | FI595505,FI595506 | 143037 |
| CH264-095N22 | Chr3:28111413-28271937 | FI595623,FI595622 | 160524 |
| CH264-293N14 | Chr3:28111413-28276203 | FI595672,FI595671 | 164790 |
| CH264-453B08 | Chr3:28111413-28253524 | FI596031,FI596030 | 142111 |
| CH264-150G04 | Chr3:28119760-28266757 | FI595348,FI595347 | 146997 |
| CH264-224G23 | Chr3:28132193-28286990 | FI595247,FI595248 | 154797 |
| CH264-249F07 | Chr3:28132983-28283070 | FI595412,FI595413 | 150087 |

|              |                        |                   |        |
|--------------|------------------------|-------------------|--------|
| CH264-142K07 | Chr3:28144190-28297675 | FI595323,FI595324 | 153485 |
| CH264-126A22 | Chr3:28144749-28299705 | FI595217,FI595218 | 154956 |
| CH264-326N19 | Chr3:28144749-28303021 | FI595891,FI595892 | 158272 |
| CH264-488O15 | Chr3:28167195-28330163 | FI595723,FI595722 | 162968 |
| CH264-391F23 | Chr3:28168413-28321583 | FI595679,FI595680 | 153170 |
| CH264-277A09 | Chr3:28211563-28354271 | FI595581,FI595580 | 142708 |
| CH264-058B01 | Chr3:28212143-28357915 | FI595459,FI595460 | 145772 |
| CH264-329C14 | Chr3:28253679-28399493 | FI595896,FI595895 | 145814 |
| CH264-508N05 | Chr3:28253679-28401396 | FI595871,FI595872 | 147717 |
| CH264-169I12 | Chr3:28261310-28417668 | FI595504,FI595503 | 156358 |
| CH264-178O13 | Chr3:28269393-28421375 | FI595567,FI595568 | 151982 |
| CH264-290I04 | Chr3:28269393-28414822 | FI595664,FI595663 | 145429 |
| CH264-380M20 | Chr3:28281652-28424279 | FI596109,FI596108 | 142627 |
| CH264-318L01 | Chr3:28287291-28436370 | FI595836,FI595835 | 149079 |
| CH264-148H20 | Chr3:28290895-28457762 | FI595340,FI595339 | 166867 |
| CH264-218C14 | Chr3:28310528-28471490 | FI595219,FI595220 | 160962 |
| CH264-087I22 | Chr3:28312119-28471489 | FI595602,FI595603 | 159370 |
| CH264-383L20 | Chr3:28312119-28457762 | FI596121,FI596120 | 145643 |
| CH264-447M07 | Chr3:28312119-28457768 | FI596002,FI596003 | 145649 |
| CH264-269M08 | Chr3:28348454-28506199 | FI595522,FI595521 | 157745 |
| CH264-130P05 | Chr3:28355729-28517289 | FI595246,FI595245 | 161560 |
| CH264-489L18 | Chr3:33885897-34010849 | FI593675,FI593674 | 124952 |
| CH264-278L12 | Chr3:33891560-34037256 | FI593040,FI593039 | 145696 |
| CH264-490D15 | Chr3:33891560-34010923 | FI593678,FI593679 | 119363 |
| CH264-192B08 | Chr3:33891561-34005272 | FI593190,FI593191 | 113711 |
| CH264-010F10 | Chr3:33891577-34023207 | FI592867,FI592866 | 131630 |
| CH264-451M05 | Chr3:33891577-34046535 | FI594025,FI594024 | 154958 |
| CH264-455N07 | Chr3:33891577-34017180 | FI594101,FI594100 | 125603 |
| CH264-017J11 | Chr3:33891579-34012679 | FI592962,FI592961 | 121100 |
| CH264-030N05 | Chr3:33891581-34019788 | FI593066,FI593065 | 128207 |
| CH264-193N16 | Chr3:33891665-34052770 | FI593198,FI593199 | 161105 |
| CH264-079I14 | Chr3:33891690-34016480 | FI592873,FI592872 | 124790 |
| CH264-255O11 | Chr3:33893853-34005271 | FI592844,FI592845 | 111418 |
| CH264-355A11 | Chr3:33893853-34002703 | FI593749,FI593748 | 108850 |
| CH264-150I07 | Chr3:33893969-34010849 | FI592827,FI592826 | 116880 |
| CH264-250N04 | Chr3:33893969-34016333 | FI592812,FI592813 | 122364 |
| CH264-121P02 | Chr3:33897394-34010904 | FI593280,FI593281 | 113510 |
| CH264-363P13 | Chr3:33932935-34095789 | FI593843,FI593842 | 162854 |
| CH264-372P08 | Chr3:33939171-34096495 | FI593998,FI593999 | 157324 |

|              |                        |                   |        |
|--------------|------------------------|-------------------|--------|
| CH264-197C17 | Chr3:33961547-34122614 | FI593215,FI593214 | 161067 |
| CH264-423I21 | Chr3:39528242-39682647 | FI593735,FI593734 | 154405 |
| CH264-181O18 | Chr3:39550016-39706670 | FI593117,FI593118 | 156654 |
| CH264-249B20 | Chr3:39560368-39710193 | FI593515,FI593516 | 149825 |
| CH264-172O12 | Chr3:39560373-39710193 | FI593017,FI593018 | 149820 |
| CH264-030O20 | Chr3:39571421-39733198 | FI593069,FI593070 | 161777 |
| CH264-442B05 | Chr3:39589855-39750991 | FI593916,FI593917 | 161136 |
| CH264-374I24 | Chr3:39623456-39791880 | FI594010,FI594011 | 168424 |
| CH264-016K18 | Chr3:39631405-39807083 | FI592958,FI592957 | 175678 |
| CH264-167J07 | Chr3:39631501-39791867 | FI592930,FI592929 | 160366 |
| CH264-423G20 | Chr3:39632826-39782349 | FI593730,FI593731 | 149523 |
| CH264-203P21 | Chr3:39640587-39808423 | FI593227,FI593226 | 167836 |
| CH264-433H16 | Chr3:39640587-39808415 | FI593841,FI593840 | 167828 |
| CH264-402N13 | Chr3:39640623-39806394 | FI593534,FI593533 | 165771 |
| CH264-365C24 | Chr3:39641848-39791759 | FI593906,FI593907 | 149911 |
| CH264-041M17 | Chr3:39672670-39835376 | FI593234,FI593235 | 162706 |
| CH264-326C03 | Chr3:39682812-39840384 | FI593544,FI593543 | 157572 |
| CH264-031I12 | Chr3:39682839-39840384 | FI593078,FI593077 | 157545 |
| CH264-087K12 | Chr3:39682848-39846945 | FI592980,FI592979 | 164097 |
| CH264-032I13 | Chr3:39691722-39857205 | FI593089,FI593090 | 165483 |
| CH264-049N13 | Chr3:39691722-39858231 | FI593274,FI593275 | 166509 |
| CH264-443O06 | Chr3:39699565-39849839 | FI593928,FI593929 | 150274 |
| CH264-042P03 | Chr3:39702144-39854946 | FI593243,FI593242 | 152802 |
| CH264-003P02 | Chr3:39733523-39907398 | FI592770,FI592771 | 173875 |
| CH264-281F20 | Chr3:39733523-39895932 | FI593104,FI593103 | 162409 |
| CH264-449I22 | Chr3:39733523-39884481 | FI594004,FI594005 | 150958 |
| CH264-391H09 | Chr3:39752003-39917823 | FI594114,FI594115 | 165820 |
| CH264-526H04 | Chr3:39757820-39918860 | FI594070,FI594071 | 161040 |
| CH264-462B08 | Chr3:39764355-39918860 | FI594154,FI594153 | 154505 |
| CH264-056B20 | Chr3:46642193-46811010 | FI593363,FI593362 | 168817 |
| CH264-033K21 | Chr3:48403636-48559559 | FI593857,FI593856 | 155923 |
| CH264-414K16 | Chr3:55784274-55961464 | FI593621,FI593620 | 177190 |
| CH264-435J24 | Chr3:55816914-55976289 | FI593896,FI593897 | 159375 |
| CH264-111H08 | Chr3:55817270-55974031 | FI593245,FI593244 | 156761 |
| CH264-115N01 | Chr3:55817270-55976470 | FI593260,FI593261 | 159200 |
| CH264-006E24 | Chr3:55822665-55973924 | FI592794,FI592795 | 151259 |
| CH264-116J20 | Chr3:55833554-55982608 | FI593265,FI593264 | 149054 |
| CH264-074C04 | Chr3:55882654-56037298 | FI592801,FI592800 | 154644 |
| CH264-467H20 | Chr3:55882654-56032942 | FI594182,FI594181 | 150288 |

|              |                        |                   |        |
|--------------|------------------------|-------------------|--------|
| CH264-415J11 | Chr3:55887207-56053718 | FI593632,FI593633 | 166511 |
| CH264-402L16 | Chr3:55887211-56037296 | FI593530,FI593529 | 150085 |
| CH264-140H22 | Chr3:55887220-56037920 | FI593449,FI593448 | 150700 |
| CH264-351J21 | Chr3:55890022-56043224 | FI593736,FI593737 | 153202 |
| CH264-209F02 | Chr3:55892288-56035803 | FI593291,FI593290 | 143515 |
| CH264-080P17 | Chr3:55893538-56043223 | FI592881,FI592880 | 149685 |
| CH264-316G04 | Chr3:55893538-56051191 | FI593492,FI593493 | 157653 |
| CH264-304O22 | Chr3:55894456-56037800 | FI593329,FI593328 | 143344 |
| CH264-449M12 | Chr3:55900113-56051370 | FI594012,FI594013 | 151257 |
| CH264-283P03 | Chr3:55923025-56080866 | FI593124,FI593123 | 157841 |
| CH264-445N06 | Chr3:55931340-56073165 | FI593936,FI593937 | 141825 |
| CH264-095I16 | Chr3:55951256-56117035 | FI593064,FI593063 | 165779 |
| CH264-142P08 | Chr3:55956550-56106931 | FI593461,FI593460 | 150381 |
| CH264-268D23 | Chr3:55956559-56117032 | FI592932,FI592931 | 160473 |
| CH264-275O14 | Chr3:55956655-56106816 | FI593028,FI593027 | 150161 |
| CH264-469C01 | Chr3:55956665-56106931 | FI593564,FI593563 | 150266 |
| CH264-306L16 | Chr3:55974132-56131534 | FI593389,FI593388 | 157402 |
| CH264-409H24 | Chr3:55976595-56118255 | FI593554,FI593553 | 141660 |
| CH264-431P24 | Chr3:55982808-56117032 | FI593829,FI593828 | 134224 |
| CH264-498L05 | Chr3:56022994-56174967 | FI593768,FI593769 | 151973 |
| CH264-491D13 | Chr3:56022999-56174967 | FI593682,FI593683 | 151968 |
| CH264-523K23 | Chr3:56026572-56177182 | FI594059,FI594058 | 150610 |
| CH264-408L01 | Chr3:56043511-56194264 | FI593546,FI593545 | 150753 |
| CH264-274P15 | Chr3:56064807-56212249 | FI593019,FI593020 | 147442 |
| CH264-106A11 | Chr3:56073456-56240909 | FI593181,FI593180 | 167453 |
| CH264-286J17 | Chr3:56080991-56229147 | FI593140,FI593139 | 148156 |
| CH264-033G10 | Chr3:56084554-56248415 | FI593149,FI593150 | 163861 |
| CH264-134P12 | Chr3:56089082-56238448 | FI593437,FI593436 | 149366 |
| CH264-131N13 | Chr3:56089093-56241387 | FI593369,FI593368 | 152294 |
| CH264-297D05 | Chr3:56089130-56234601 | FI593225,FI593224 | 145471 |
| CH264-001K18 | Chr3:56145626-56316625 | FI592763,FI592762 | 170999 |
| CH264-455O24 | Chr3:56169512-56335485 | FI594104,FI594105 | 165973 |
| CH264-431I23 | Chr3:56174999-56316625 | FI593820,FI593821 | 141626 |
| CH264-257C24 | Chr3:56175003-56325404 | FI592849,FI592848 | 150401 |
| CH264-410A20 | Chr3:56177346-56335485 | FI593557,FI593558 | 158139 |
| CH264-028P11 | Chr3:56201189-56371934 | FI593050,FI593049 | 170745 |
| CH264-043F18 | Chr3:56201189-56360997 | FI593246,FI593247 | 159808 |
| CH264-453P09 | Chr3:56215231-56373127 | FI594096,FI594097 | 157896 |
| CH264-231E20 | Chr3:56215237-56391863 | FI593422,FI593423 | 176626 |



|              |                        |                   |        |
|--------------|------------------------|-------------------|--------|
| CH264-363H04 | Chr3:56238563-56387104 | FI593831,FI593830 | 148541 |
| CH264-024O24 | Chr3:56248612-56426514 | FI592990,FI592989 | 177902 |
| CH264-294N15 | Chr3:56257021-56404633 | FI593217,FI593216 | 147612 |
| CH264-520D07 | Chr3:56257417-56422435 | FI594038,FI594039 | 165018 |
| CH264-322E11 | Chr3:56258611-56422420 | FI593528,FI593527 | 163809 |
| CH264-226N02 | Chr3:56258620-56422420 | FI593403,FI593402 | 163800 |
| CH264-161O14 | Chr3:56265115-56431296 | FI592906,FI592907 | 166181 |
| CH264-045C10 | Chr3:56265384-56422419 | FI593259,FI593258 | 157035 |
| CH264-213M05 | Chr3:56265401-56422435 | FI593306,FI593307 | 157034 |
| CH264-226J21 | Chr3:56271865-56431296 | FI593398,FI593399 | 159431 |
| CH264-217L17 | Chr3:56291495-56470193 | FI593318,FI593319 | 178698 |
| CH264-510K18 | Chr3:56291505-56442079 | FI593882,FI593883 | 150574 |
| CH264-259J12 | Chr3:56291823-56447378 | FI592905,FI592904 | 155555 |
| CH264-459O04 | Chr3:56291824-56441609 | FI594124,FI594125 | 149785 |
| CH264-077F13 | Chr3:56306057-56463883 | FI592860,FI592861 | 157826 |
| CH264-173C17 | Chr3:56310146-56463843 | FI593022,FI593021 | 153697 |
| CH264-437E17 | Chr3:56315591-56464421 | FI593900,FI593901 | 148830 |
| CH264-437E19 | Chr3:56315613-56464386 | FI593904,FI593905 | 148773 |
| CH264-114O11 | Chr3:56316871-56470193 | FI593253,FI593252 | 153322 |
| CH264-051N05 | Chr3:56322993-56470193 | FI593331,FI593330 | 147200 |
| CH264-321M19 | Chr3:56322993-56464421 | FI593524,FI593523 | 141428 |
| CH264-469B02 | Chr3:56325615-56497392 | FI594198,FI594197 | 171777 |
| CH264-392A09 | Chr3:56325688-56468329 | FI594119,FI594118 | 142641 |
| CH264-100K24 | Chr3:56329301-56497284 | FI593151,FI593152 | 167983 |
| CH264-163K05 | Chr3:56329319-56498218 | FI592911,FI592910 | 168899 |
| CH264-082C14 | Chr3:56329417-56498218 | FI592901,FI592900 | 168801 |
| CH264-097I09 | Chr3:56335504-56491393 | FI593091,FI593092 | 155889 |
| CH264-066F24 | Chr3:56344743-56494643 | FI593471,FI593470 | 149900 |
| CH264-214E08 | Chr3:56344743-56498218 | FI593310,FI593311 | 153475 |
| CH264-166F23 | Chr3:56365873-56526869 | FI592923,FI592922 | 160996 |
| CH264-391C11 | Chr3:56368135-56517543 | FI594106,FI594107 | 149408 |
| CH264-364D12 | Chr3:56368210-56517543 | FI593895,FI593894 | 149333 |
| CH264-105E12 | Chr3:56387316-56541259 | FI593172,FI593173 | 153943 |
| CH264-328F06 | Chr3:65511427-65672124 | FI596163,FI596162 | 160697 |
| CH264-196K24 | Chr3:65868122-66020079 | FI593211,FI593210 | 151957 |
| CH264-474L11 | Chr3:65868266-66017304 | FI593580,FI593579 | 149038 |
| CH264-184D24 | Chr3:65874216-66017304 | FI593121,FI593122 | 143088 |
| CH264-321C21 | Chr3:65877863-66034254 | FI593518,FI593517 | 156391 |
| CH264-397A07 | Chr3:65878913-66020062 | FI594187,FI594188 | 141149 |

|               |                        |                   |        |
|---------------|------------------------|-------------------|--------|
| CH264-189K06  | Chr3:65887736-66034254 | FI593138,FI593137 | 146518 |
| CH264-280K17  | Chr3:65887736-66034211 | FI593099,FI593100 | 146475 |
| CH264-095K11  | Chr3:65893312-66044870 | FI593072,FI593071 | 151558 |
| CH264-273M09  | Chr3:65893325-66017304 | FI593000,FI592999 | 123979 |
| CH264-318N13  | Chr3:65895573-66041511 | FI593506,FI593507 | 145938 |
| CH264-447L07  | Chr3:65896828-66044870 | FI593996,FI593997 | 148042 |
| CH264-253K05  | Chr3:65906208-66060346 | FI592832,FI592833 | 154138 |
| CH264-281J08  | Chr3:65906613-66041511 | FI593107,FI593108 | 134898 |
| CH264-041N10  | Chr3:65942714-66100452 | FI593238,FI593239 | 157738 |
| CH264-097F21  | Chr3:65975617-66134232 | FI593088,FI593087 | 158615 |
| CH264-250D07  | Chr3:65977916-66125201 | FI592809,FI592808 | 147285 |
| CH264-009C22  | Chr3:65977919-66126251 | FI592803,FI592802 | 148332 |
| CH264-446F11  | Chr3:65977924-66143879 | FI593941,FI593940 | 165955 |
| CH264-272N17  | Chr3:65990098-66150827 | FI592944,FI592943 | 160729 |
| CH264-399M11  | Chr3:65990100-66143879 | FI594196,FI594195 | 153779 |
| CH264-125E20  | Chr3:65990112-66120484 | FI593341,FI593340 | 130372 |
| CH264-275L01  | Chr3:65990112-66140639 | FI593024,FI593023 | 150527 |
| CH264-411A20  | Chr3:65990112-66134232 | FI593561,FI593562 | 144120 |
| CH264-013B22  | Chr3:66002803-66174859 | FI592882,FI592883 | 172056 |
| CH264-060N10  | Chr3:66002812-66168084 | FI593439,FI593438 | 165272 |
| CH264-175O04  | Chr3:66010796-66175220 | FI593093,FI593094 | 164424 |
| CH264-039H18  | Chr3:66017654-66182930 | FI593178,FI593179 | 165276 |
| CH264-375E03  | Chr3:66031126-66175220 | FI594014,FI594015 | 144094 |
| CH264-464N10  | Chr3:66034444-66182930 | FI594169,FI594170 | 148486 |
| CH264-426D08  | Chr3:66044970-66201934 | FI593805,FI593806 | 156964 |
| CH264-371O20  | Chr3:66047804-66207816 | FI593926,FI593927 | 160012 |
| CH264-031O05* | Chr3:69515459-69677334 | FI593081,FI593082 | 161875 |
| CH264-254M08* | Chr3:69529303-69684343 | FI592836,FI592837 | 155040 |
| CH264-045E14* | Chr3:69541180-69708694 | FI593263,FI593262 | 167514 |
| CH264-094J20* | Chr3:69541180-69698009 | FI593055,FI593056 | 156829 |
| CH264-492A17* | Chr3:69541180-69692964 | FI593690,FI593691 | 151784 |
| CH264-399M13* | Chr3:69609491-69760280 | FI593521,FI593522 | 150789 |
| CH264-398E16* | Chr3:69621355-69774167 | FI594191,FI594192 | 152812 |
| CH264-416J17* | Chr3:69621369-69791015 | FI593644,FI593645 | 169646 |
| CH264-481H19* | Chr3:69666273-69813486 | FI593592,FI593591 | 147213 |
| CH264-124E22* | Chr3:69695600-69844769 | FI593337,FI593336 | 149169 |
| CH264-471O10* | Chr3:69704464-69844769 | FI593576,FI593575 | 140305 |
| CH264-264G20* | Chr3:69708826-69850364 | FI592912,FI592913 | 141538 |
| CH264-449I23* | Chr3:69725144-69880102 | FI594008,FI594009 | 154958 |

|               |                        |                   |        |
|---------------|------------------------|-------------------|--------|
| CH264-361J14* | Chr3:69725145-69871712 | FI593827,FI593826 | 146567 |
| CH264-236C18* | Chr3:69725292-69880102 | FI593479,FI593478 | 154810 |
| CH264-152F03* | Chr3:69725294-69880100 | FI592831,FI592830 | 154806 |
| CH264-203J04* | Chr3:69753731-69921244 | FI593222,FI593223 | 167513 |
| CH264-363O05* | Chr3:69759701-69927149 | FI593838,FI593839 | 167448 |
| CH264-060A04* | Chr3:69759706-69926664 | FI593430,FI593431 | 166958 |
| CH264-294P06* | Chr3:69765767-69926728 | FI593220,FI593221 | 160961 |
| CH264-408P22* | Chr3:69765817-69921335 | FI593549,FI593550 | 155518 |
| CH264-459D12* | Chr3:69765826-69927149 | FI594116,FI594117 | 161323 |
| CH264-394C13* | Chr3:69785540-69948821 | FI594171,FI594172 | 163281 |
| CH264-373H03* | Chr3:69787608-69935461 | FI594007,FI594006 | 147853 |
| CH264-362O18* | Chr3:69791025-69935460 | FI594281,FI594280 | 144435 |
| CH264-455G11* | Chr3:69791028-69948815 | FI594946,FI594947 | 157787 |
| CH264-109O13* | Chr3:69793666-69948760 | FI594234,FI594235 | 155094 |
| CH264-149G05* | Chr3:69811294-69973133 | FI594606,FI594605 | 161839 |
| CH264-449L21* | Chr3:69813767-69975759 | FI594873,FI594874 | 161992 |
| CH264-293M01* | Chr3:69837967-69999396 | FI594381,FI594382 | 161429 |
| CH264-519C12* | Chr3:69839525-69999315 | FI595379,FI595380 | 159790 |
| CH264-225P20* | Chr3:69839546-69994608 | FI594509,FI594510 | 155062 |
| CH264-514P20* | Chr3:69839546-69999315 | FI595297,FI595298 | 159769 |
| CH264-183C22* | Chr3:69844785-70003129 | FI594902,FI594901 | 158344 |
| CH264-407M12* | Chr3:69848322-69994504 | FI594555,FI594556 | 146182 |
| CH264-157A09* | Chr3:69848323-70003126 | FI594645,FI594644 | 154803 |
| CH264-010K04* | Chr3:69850566-70007003 | FI593609,FI593608 | 156437 |
| CH264-191K12* | Chr3:69850566-70024640 | FI594237,FI594236 | 174074 |
| CH264-431M04* | Chr3:69850566-70006873 | FI594769,FI594768 | 156307 |
| CH264-050E07* | Chr3:69850853-70019584 | FI593944,FI593945 | 168731 |
| CH264-262I07* | Chr3:69850853-70019584 | FI594802,FI594803 | 168731 |
| CH264-150O22* | Chr3:69850854-70020314 | FI594617,FI594618 | 169460 |
| CH264-450B12* | Chr3:69850864-69999396 | FI594880,FI594881 | 148532 |
| CH264-024O18* | Chr3:69853637-70020224 | FI593770,FI593771 | 166587 |
| CH264-489A03* | Chr3:69861500-70007009 | FI595093,FI595092 | 145509 |
| CH264-195G15* | Chr3:69861512-70019584 | FI594257,FI594256 | 158072 |
| CH264-001K08* | Chr3:69868939-70024500 | FI593565,FI593566 | 155561 |
| CH264-415I22* | Chr3:69872685-70024639 | FI595829,FI595830 | 151954 |
| CH264-353M16* | Chr3:69875973-70024621 | FI594942,FI594941 | 148648 |
| CH264-114C07* | Chr3:69875976-70026931 | FI594255,FI594254 | 150955 |
| CH264-046C14* | Chr3:69876055-70026930 | FI593877,FI593876 | 150875 |
| CH264-425M15* | Chr3:69880124-70003032 | FI594694,FI594693 | 122908 |

|               |                        |                   |        |
|---------------|------------------------|-------------------|--------|
| CH264-065J23* | Chr3:69927267-70084108 | FI594044,FI594045 | 156841 |
| CH264-029D16* | Chr3:69935484-70090085 | FI593798,FI593797 | 154601 |
| CH264-230I16* | Chr3:69935490-70097198 | FI594538,FI594537 | 161708 |
| CH264-195P23* | Chr3:69939721-70102308 | FI594260,FI594261 | 162587 |
| CH264-294D19* | Chr3:69939721-70086584 | FI594386,FI594385 | 146863 |
| CH264-098D24* | Chr3:69956324-70121402 | FI594206,FI594205 | 165078 |
| CH264-203A06* | Chr3:69960996-70121584 | FI594348,FI594347 | 160588 |
| CH264-166F04* | Chr3:69986238-70142569 | FI594788,FI594789 | 156331 |
| CH264-490N07* | Chr3:69994626-70166814 | FI595105,FI595104 | 172188 |
| CH264-019P11* | Chr3:69999705-70166817 | FI593754,FI593755 | 167112 |
| CH264-013B21* | Chr3:70020338-70180246 | FI593668,FI593669 | 159908 |
| CH264-143C01* | Chr3:70020343-70166816 | FI594544,FI594543 | 146473 |
| CH264-321D18* | Chr3:70020343-70181464 | FI594589,FI594590 | 161121 |
| CH264-123H08* | Chr3:70020345-70179708 | FI594350,FI594349 | 159363 |
| CH264-196H09* | Chr3:70020348-70171870 | FI594265,FI594264 | 151522 |
| CH264-361J15* | Chr3:70020350-70166710 | FI594973,FI594972 | 146360 |
| CH264-021N17* | Chr3:70026950-70179708 | FI593758,FI593759 | 152758 |
| CH264-326E13* | Chr3:70026965-70186652 | FI594661,FI594660 | 159687 |
| CH264-163O17* | Chr3:70057073-70220618 | FI594719,FI594718 | 163545 |
| CH264-516G09* | Chr3:70064412-70215339 | FI595355,FI595356 | 150927 |
| CH264-149H11* | Chr3:70081187-70243822 | FI594609,FI594610 | 162635 |
| CH264-028K21* | Chr3:70090177-70261693 | FI593793,FI593794 | 171516 |
| CH264-213B18* | Chr3:70091554-70243822 | FI594419,FI594420 | 152268 |
| CH264-441K21* | Chr3:70095687-70259019 | FI594854,FI594853 | 163332 |
| CH264-255P19* | Chr3:70098695-70256059 | FI594736,FI594737 | 157364 |
| CH264-167B18* | Chr3:70102323-70267169 | FI594796,FI594797 | 164846 |
| CH264-316H09* | Chr3:70102334-70261753 | FI594561,FI594562 | 159419 |
| CH264-120M03* | Chr3:70102438-70261840 | FI594330,FI594329 | 159402 |
| CH264-430N19* | Chr3:70109802-70256063 | FI594765,FI594764 | 146261 |
| CH264-246A06* | Chr3:70282367-70429097 | FI594713,FI594714 | 146730 |
| CH264-351F21* | Chr3:70282367-70429100 | FI594930,FI594929 | 146733 |
| CH264-401P17* | Chr3:70282372-70440858 | FI594485,FI594486 | 158486 |
| CH264-517L06* | Chr3:70282372-70427854 | FI595372,FI595371 | 145482 |
| CH264-524D13* | Chr3:70314258-70464381 | FI595449,FI595450 | 150123 |
| CH264-446D14* | Chr3:70333030-70475629 | FI594858,FI594857 | 142599 |
| CH264-035H19* | Chr3:70333032-70486871 | FI593860,FI593861 | 153839 |
| CH264-148H17* | Chr3:70337371-70486863 | FI594601,FI594602 | 149492 |
| CH264-463J10* | Chr3:70337463-70479744 | FI594983,FI594984 | 142281 |
| CH264-274A06* | Chr3:70337729-70479744 | FI594920,FI594919 | 142015 |

|               |                        |                   |        |
|---------------|------------------------|-------------------|--------|
| CH264-230L24* | Chr3:70337736-70479740 | FI594542,FI594541 | 142004 |
| CH264-331D14* | Chr3:70377850-70518403 | FI594687,FI594688 | 140553 |
| CH264-124J12* | Chr3:70385975-70543785 | FI594362,FI594361 | 157810 |
| CH264-503O08* | Chr3:70385975-70533106 | FI595208,FI595207 | 147131 |
| CH264-406E22* | Chr3:70385976-70547258 | FI594501,FI594502 | 161282 |
| CH264-332K11* | Chr3:70415388-70569036 | FI594742,FI594743 | 153648 |
| CH264-194E07* | Chr3:70419839-70576635 | FI594249,FI594248 | 156796 |
| CH264-015B08* | Chr3:70429124-70586389 | FI593672,FI593673 | 157265 |
| CH264-032J17* | Chr3:70431710-70586389 | FI593852,FI593853 | 154679 |
| CH264-358C02* | Chr3:70431710-70586404 | FI593807,FI593808 | 154694 |
| CH264-164G23* | Chr3:70436321-70586389 | FI594726,FI594727 | 150068 |
| CH264-272L02* | Chr3:70475735-70633466 | FI594911,FI594912 | 157731 |
| CH264-078J23* | Chr3:70482019-70651202 | FI594129,FI594130 | 169183 |
| CH264-056H22* | Chr3:70500631-70651202 | FI593973,FI593972 | 150571 |
| CH264-334A06* | Chr3:70506799-70651202 | FI595911,FI595912 | 144403 |
| CH264-346N13* | Chr3:70524389-70676586 | FI594851,FI594852 | 152197 |
| CH264-132C13* | Chr3:70533291-70692956 | FI594443,FI594444 | 159665 |
| CH264-468E16* | Chr3:70533291-70676542 | FI594996,FI594995 | 143251 |
| CH264-302F09* | Chr3:70542900-70699232 | FI594475,FI594476 | 156332 |
| CH264-491O05* | Chr3:70543819-70702527 | FI595108,FI595109 | 158708 |
| CH264-021P06* | Chr3:70547404-70702585 | FI593762,FI593763 | 155181 |
| CH264-295K02* | Chr3:70547404-70699710 | FI594401,FI594402 | 152306 |
| CH264-501O05* | Chr3:70558923-70708585 | FI595191,FI595192 | 149662 |
| CH264-164F04* | Chr3:70558930-70713131 | FI594723,FI594722 | 154201 |
| CH264-345A02* | Chr3:70558930-70696736 | FI594844,FI594843 | 137806 |
| CH264-054H05* | Chr3:70569177-70739906 | FI593965,FI593964 | 170729 |
| CH264-047K12* | Chr3:70569254-70716294 | FI593889,FI593888 | 147040 |
| CH264-356H02* | Chr3:70574651-70721559 | FI594949,FI594948 | 146908 |
| CH264-294F05* | Chr3:70574783-70716380 | FI594389,FI594390 | 141597 |
| CH264-411B13* | Chr3:70574783-70713118 | FI594571,FI594572 | 138335 |
| CH264-501O15* | Chr3:70574783-70728457 | FI595196,FI595195 | 153674 |
| CH264-092L09* | Chr3:70610552-70780880 | FI595607,FI595606 | 170328 |
| CH264-461O12* | Chr3:70696756-70875799 | FI596062,FI596063 | 179043 |
| CH264-353C06* | Chr3:70705988-70855717 | FI595993,FI595992 | 149729 |
| CH264-209K12* | Chr3:70708826-70875780 | FI595129,FI595130 | 166954 |
| CH264-141O09* | Chr3:70716423-70875781 | FI595321,FI595322 | 159358 |
| CH264-090A01* | Chr3:70744354-70915199 | FI596236,FI596237 | 170845 |
| CH264-194L19* | Chr3:70752019-70905053 | FI595657,FI595658 | 153034 |
| CH264-313A04* | Chr3:70752019-70908504 | FI595784,FI595783 | 156485 |

|               |                        |                   |        |
|---------------|------------------------|-------------------|--------|
| CH264-035G11* | Chr3:70752152-70902339 | FI595288,FI595287 | 150187 |
| CH264-171P20* | Chr3:70752152-70905040 | FI595516,FI595515 | 152888 |
| CH264-455O10* | Chr3:70752152-70902338 | FI596043,FI596042 | 150186 |
| CH264-492D05* | Chr3:70752768-70931693 | FI595734,FI595735 | 178925 |
| CH264-235L08* | Chr3:70752781-70922880 | FI595329,FI595330 | 170099 |
| CH264-340H20* | Chr3:70759548-70908505 | FI595960,FI595961 | 148957 |
| CH264-409A09* | Chr3:70764580-70922472 | FI595781,FI595782 | 157892 |
| CH264-392K12* | Chr3:70764585-70921519 | FI595690,FI595691 | 156934 |
| CH264-381D18* | Chr3:70765580-70921837 | FI596112,FI596113 | 156257 |
| CH264-033B19* | Chr3:70765581-70922483 | FI595259,FI595260 | 156902 |
| CH264-175B03* | Chr3:70765587-70934540 | FI595527,FI595528 | 168953 |
| CH264-060A09* | Chr3:70779325-70934551 | FI595468,FI595467 | 155226 |
| CH264-040K14* | Chr3:70780893-70929437 | FI595303,FI595304 | 148544 |
| CH264-079H10* | Chr3:70780894-70949760 | FI595542,FI595541 | 168866 |
| CH264-128A19* | Chr3:70780894-70949760 | FI595237,FI595238 | 168866 |
| CH264-431D15* | Chr3:70780894-70931716 | FI595909,FI595910 | 150822 |
| CH264-134J08* | Chr3:70780932-70946891 | FI595310,FI595309 | 165959 |
| CH264-111N23* | Chr3:70787625-70949949 | FI595120,FI595121 | 162324 |
| CH264-489D05* | Chr3:70796693-70966291 | FI595724,FI595725 | 169598 |
| CH264-236C03* | Chr3:70796797-70949760 | FI595333,FI595334 | 152963 |
| CH264-085H11* | Chr3:70797446-70961767 | FI595551,FI595552 | 164321 |
| CH264-273O09* | Chr3:70803671-70961762 | FI595569,FI595570 | 158091 |
| CH264-223H02  | Chr3:70827483-70991679 | FI595240,FI595239 | 164196 |
| CH264-312K16  | Chr3:70827500-70985470 | FI595780,FI595779 | 157970 |
| CH264-262I18  | Chr3:70831528-70991679 | FI595501,FI595502 | 160151 |
| CH264-161F24  | Chr3:70861147-71022017 | FI595430,FI595429 | 160870 |
| CH264-127L07  | Chr3:70874859-71035222 | FI595234,FI595233 | 160363 |
| CH264-302N24  | Chr3:70875849-71040588 | FI595747,FI595748 | 164739 |
| CH264-215H19  | Chr3:70875850-71028442 | FI595162,FI595161 | 152592 |
| CH264-448L10  | Chr3:70875856-71028432 | FI596007,FI596006 | 152576 |
| CH264-292H08  | Chr3:70908582-71054520 | FI595668,FI595667 | 145938 |
| CH264-208F19  | Chr3:70922490-71079049 | FI595122,FI595123 | 156559 |
| CH264-283G20  | Chr3:70931754-71076185 | FI595601,FI595600 | 144431 |
| CH264-245B11  | Chr3:70957959-71108641 | FI595350,FI595349 | 150682 |
| CH264-218P04  | Chr3:70978163-71145959 | FI595232,FI595231 | 167796 |
| CH264-045I15  | Chr3:70986871-71142424 | FI595373,FI595374 | 155553 |
| CH264-258E08  | Chr3:70989209-71154506 | FI595440,FI595439 | 165297 |
| CH264-177L19  | Chr3:70990845-71146273 | FI595564,FI595563 | 155428 |
| CH264-361D02  | Chr3:71001931-71158690 | FI596045,FI596044 | 156759 |

|              |                        |                   |        |
|--------------|------------------------|-------------------|--------|
| CH264-304C11 | Chr3:71003920-71146273 | FI595764,FI595763 | 142353 |
| CH264-310B09 | Chr3:71007733-71184821 | FI595776,FI595775 | 177088 |
| CH264-234K23 | Chr3:71022029-71184821 | FI595320,FI595319 | 162792 |
| CH264-462F16 | Chr3:71022029-71179913 | FI596067,FI596066 | 157884 |
| CH264-006B20 | Chr3:71028656-71202679 | FI594993,FI594994 | 174023 |
| CH264-035G13 | Chr3:71028656-71179911 | FI595292,FI595291 | 151255 |
| CH264-192C14 | Chr3:71035336-71210316 | FI595650,FI595649 | 174980 |
| CH264-303J07 | Chr3:71035336-71184821 | FI595756,FI595755 | 149485 |
| CH264-502G04 | Chr3:71035336-71210511 | FI595810,FI595809 | 175175 |
| CH264-117C07 | Chr3:71045211-71214836 | FI595140,FI595139 | 169625 |
| CH264-160A19 | Chr3:71045211-71214840 | FI595425,FI595426 | 169629 |
| CH264-490P05 | Chr3:71045211-71179884 | FI595730,FI595731 | 134673 |
| CH264-297N21 | Chr3:71054656-71214891 | FI595701,FI595700 | 160235 |
| CH264-418I12 | Chr3:71054671-71214905 | FI595845,FI595846 | 160234 |
| CH264-355F17 | Chr3:71054677-71210499 | FI596009,FI596008 | 155822 |
| CH264-144P08 | Chr3:71054726-71214898 | FI595336,FI595335 | 160172 |
| CH264-217P05 | Chr3:71055105-71214845 | FI595216,FI595215 | 159740 |
| CH264-001G08 | Chr3:71056796-71223252 | FI594977,FI594978 | 166456 |
| CH264-041K10 | Chr3:71058841-71222915 | FI595361,FI595362 | 164074 |
| CH264-211N07 | Chr3:71064273-71214908 | FI595145,FI595146 | 150635 |
| CH264-284A21 | Chr3:71064273-71223853 | FI595628,FI595627 | 159580 |
| CH264-400M15 | Chr3:71064273-71223252 | FI595754,FI595753 | 158979 |
| CH264-379D08 | Chr3:71071745-71223252 | FI596101,FI596100 | 151507 |
| CH264-299M03 | Chr3:71071746-71223252 | FI595712,FI595713 | 151506 |
| CH264-455N04 | Chr3:71071746-71224162 | FI596038,FI596039 | 152416 |
| CH264-396D14 | Chr3:71076312-71214908 | FI595707,FI595706 | 138596 |
| CH264-419M11 | Chr3:71108698-71258579 | FI595861,FI595862 | 149881 |
| CH264-239I12 | Chr3:71116229-71258579 | FI595338,FI595337 | 142350 |
| CH264-188E06 | Chr3:71123240-71286197 | FI595641,FI595642 | 162957 |
| CH264-007K13 | Chr3:71123242-71293636 | FI595001,FI595002 | 170394 |
| CH264-148O09 | Chr3:71130841-71286090 | FI595344,FI595343 | 155249 |
| CH264-052C09 | Chr3:71132294-71298336 | FI595398,FI595397 | 166042 |
| CH264-232N13 | Chr3:71132294-71293636 | FI595255,FI595256 | 161342 |
| CH264-302E07 | Chr3:71132294-71289925 | FI595716,FI595717 | 157631 |
| CH264-332G16 | Chr3:71132294-71286198 | FI595904,FI595903 | 153904 |
| CH264-390G10 | Chr3:71132294-71293636 | FI596141,FI596140 | 161342 |
| CH264-440G17 | Chr3:71132294-71293636 | FI595971,FI595970 | 161342 |
| CH264-445I10 | Chr3:71132294-71286198 | FI595994,FI595995 | 153904 |
| CH264-475C17 | Chr3:71143298-71300725 | FI596115,FI596114 | 157427 |

|              |                        |                   |        |
|--------------|------------------------|-------------------|--------|
| CH264-266P02 | Chr3:71146785-71289924 | FI595518,FI595517 | 143139 |
| CH264-443P19 | Chr3:71154729-71309802 | FI595986,FI595987 | 155073 |
| CH264-044M06 | Chr3:71169382-71332596 | FI595369,FI595370 | 163214 |
| CH264-285C22 | Chr3:71171634-71321329 | FI595640,FI595639 | 149695 |
| CH264-504P01 | Chr3:71171634-71321328 | FI595863,FI595864 | 149694 |
| CH264-387M03 | Chr3:71179924-71339512 | FI596129,FI596128 | 159588 |
| CH264-233J04 | Chr3:71179933-71343564 | FI595312,FI595311 | 163631 |
| CH264-469F03 | Chr3:71184846-71332596 | FI596091,FI596090 | 147750 |
| CH264-233A17 | Chr3:71212338-71360418 | FI595307,FI595308 | 148080 |
| CH264-195E14 | Chr3:71214857-71360425 | FI595665,FI595666 | 145568 |
| CH264-321P06 | Chr3:71214930-71357426 | FI595852,FI595851 | 142496 |
| CH264-357I09 | Chr3:71214930-71370790 | FI596033,FI596032 | 155860 |
| CH264-235K08 | Chr3:71214940-71357711 | FI595326,FI595325 | 142771 |
| CH264-161O03 | Chr3:71223285-71379105 | FI595434,FI595433 | 155820 |
| CH264-347A20 | Chr3:71223310-71370790 | FI595972,FI595973 | 147480 |
| CH264-389D12 | Chr3:71224231-71378267 | FI596133,FI596132 | 154036 |
| CH264-357C16 | Chr3:71258599-71403387 | FI596029,FI596028 | 144788 |
| CH264-265G07 | Chr3:71260548-71413953 | FI595513,FI595514 | 153405 |
| CH264-242F23 | Chr3:71286223-71442862 | FI595341,FI595342 | 156639 |
| CH264-035G04 | Chr3:71294077-71464888 | FI593158,FI593157 | 170811 |
| CH264-321F19 | Chr3:71294142-71443061 | FI593519,FI593520 | 148919 |
| CH264-188F23 | Chr3:71298421-71442880 | FI593130,FI593129 | 144459 |
| CH264-382N07 | Chr3:71300833-71456477 | FI594035,FI594034 | 155644 |
| CH264-094B02 | Chr3:71310061-71463383 | FI595617,FI595616 | 153322 |
| CH264-113D14 | Chr3:71310061-71466670 | FI593249,FI593248 | 156609 |
| CH264-496H12 | Chr3:71321386-71463385 | FI593765,FI593764 | 141999 |
| CH264-516G17 | Chr3:71321386-71468252 | FI593974,FI593975 | 146866 |
| CH264-064G05 | Chr3:71321387-71468237 | FI593463,FI593462 | 146850 |
| CH264-452G23 | Chr3:71321387-71464888 | FI594036,FI594037 | 143501 |
| CH264-004F18 | Chr3:71321392-71468219 | FI592782,FI592783 | 146827 |
| CH264-516C11 | Chr3:71321392-71468234 | FI593970,FI593971 | 146842 |
| CH264-516O05 | Chr3:71321392-71468248 | FI593982,FI593983 | 146856 |
| CH264-521O11 | Chr3:71321392-71464888 | FI594047,FI594046 | 143496 |
| CH264-516I05 | Chr3:71321497-71468142 | FI593978,FI593979 | 146645 |
| CH264-276L04 | Chr3:71321501-71466670 | FI593032,FI593031 | 145169 |
| CH264-402J16 | Chr3:71332864-71486586 | FI593525,FI593526 | 153722 |
| CH264-357E01 | Chr3:71337842-71491767 | FI593803,FI593804 | 153925 |
| CH264-419I24 | Chr3:71339814-71486587 | FI593710,FI593711 | 146773 |
| CH264-131B10 | Chr3:71339816-71486587 | FI593364,FI593365 | 146771 |



|              |                        |                   |        |
|--------------|------------------------|-------------------|--------|
| CH264-226G11 | Chr3:71343730-71500140 | FI593395,FI593394 | 156410 |
| CH264-445C08 | Chr3:71357926-71511553 | FI593933,FI593932 | 153627 |
| CH264-056C21 | Chr3:71360468-71519879 | FI593367,FI593366 | 159411 |
| CH264-393K07 | Chr3:71414167-71560750 | FI594164,FI594163 | 146583 |
| CH264-070D11 | Chr3:71442890-71608251 | FI592784,FI592785 | 165361 |
| CH264-372J16 | Chr3:71442891-71588365 | FI593990,FI593991 | 145474 |
| CH264-018E01 | Chr3:71442909-71592583 | FI592966,FI592965 | 149674 |
| CH264-443G01 | Chr3:71442909-71602619 | FI593925,FI593924 | 159710 |
| CH264-482J17 | Chr3:71452059-71602619 | FI593596,FI593595 | 150560 |
| CH264-359N02 | Chr3:71463415-71608251 | FI593816,FI593815 | 144836 |
| CH264-341D08 | Chr3:71463419-71621657 | FI593642,FI593643 | 158238 |
| CH264-345H01 | Chr3:71488503-71628527 | FI593721,FI593720 | 140024 |
| CH264-178P19 | Chr3:71489812-71634283 | FI593106,FI593105 | 144471 |
| CH264-251M17 | Chr3:71489812-71621871 | FI592820,FI592821 | 132059 |
| CH264-462O10 | Chr3:71489812-71647136 | FI594161,FI594162 | 157324 |
| CH264-527F07 | Chr3:71489812-71628774 | FI594075,FI594074 | 138962 |
| CH264-342B02 | Chr3:71494031-71647143 | FI593651,FI593650 | 153112 |
| CH264-512E12 | Chr3:71494031-71647141 | FI593942,FI593943 | 153110 |
| CH264-232F23 | Chr3:71504069-71647143 | FI593475,FI593474 | 143074 |
| CH264-053D08 | Chr3:71506374-71656585 | FI593343,FI593342 | 150211 |
| CH264-301M23 | Chr3:71506432-71654887 | FI593308,FI593309 | 148455 |
| CH264-466O08 | Chr3:78712822-78868289 | FI594178,FI594177 | 155467 |
| CH264-503O10 | Chr3:78713872-78868288 | FI593846,FI593847 | 154416 |
| CH264-192J03 | Chr3:78718559-78868292 | FI593195,FI593194 | 149733 |
| CH264-318B12 | Chr3:78721457-78868228 | FI593502,FI593503 | 146771 |
| CH264-344D19 | Chr3:78740059-78887749 | FI593712,FI593713 | 147690 |
| CH264-395N03 | Chr3:78740059-78880392 | FI594179,FI594180 | 140333 |
| CH264-297J24 | Chr3:78762897-78919954 | FI593229,FI593228 | 157057 |
| CH264-054L20 | Chr3:78770043-78919953 | FI593351,FI593350 | 149910 |
| CH264-115L12 | Chr3:78770043-78919960 | FI593257,FI593256 | 149917 |
| CH264-210H15 | Chr3:78770043-78919952 | FI593299,FI593298 | 149909 |
| CH264-311G24 | Chr3:78796282-78950212 | FI593396,FI593397 | 153930 |
| CH264-459E21 | Chr3:78800356-78950212 | FI594121,FI594120 | 149856 |
| CH264-009O24 | Chr3:78801848-78958437 | FI592854,FI592855 | 156589 |
| CH264-032G21 | Chr3:78801853-78950212 | FI593086,FI593085 | 148359 |
| CH264-423F12 | Chr3:78806227-78950212 | FI593727,FI593726 | 143985 |
| CH264-338P02 | Chr3:78811827-78958311 | FI593626,FI593627 | 146484 |
| CH264-119K13 | Chr3:78811948-78971996 | FI593268,FI593269 | 160048 |
| CH264-050J05 | Chr3:78825192-78990393 | FI593278,FI593279 | 165201 |

|              |                        |                   |        |
|--------------|------------------------|-------------------|--------|
| CH264-501E19 | Chr3:78825869-78975887 | FI593791,FI593792 | 150018 |
| CH264-177O19 | Chr3:78827033-78990297 | FI593098,FI593097 | 163264 |
| CH264-451O12 | Chr3:78859936-79021533 | FI594028,FI594029 | 161597 |
| CH264-055J01 | Chr3:78859938-79014176 | FI593358,FI593359 | 154238 |
| CH264-160G10 | Chr3:78864156-79037127 | FI592903,FI592902 | 172971 |
| CH264-499P03 | Chr3:78869267-79038649 | FI593784,FI593785 | 169382 |
| CH264-471K04 | Chr3:78878562-79021546 | FI593568,FI593567 | 142984 |
| CH264-501H07 | Chr3:78878562-79038656 | FI593796,FI593795 | 160094 |
| CH264-504G13 | Chr3:78878562-79029723 | FI593851,FI593850 | 151161 |
| CH264-450K01 | Chr3:78887688-79047560 | FI594020,FI594021 | 159872 |
| CH264-266I13 | Chr3:78888015-79047562 | FI592917,FI592916 | 159547 |
| CH264-016A09 | Chr3:78889962-79049091 | FI592898,FI592899 | 159129 |
| CH264-384P17 | Chr3:78890003-79047566 | FI594082,FI594083 | 157563 |
| CH264-352L12 | Chr3:78913275-79066022 | FI593745,FI593744 | 152747 |
| CH264-029I06 | Chr3:78920005-79078317 | FI593053,FI593054 | 158312 |
| CH264-372B20 | Chr3:78924078-79078317 | FI593931,FI593930 | 154239 |
| CH264-223I21 | Chr3:78924191-79082298 | FI593378,FI593379 | 158107 |
| CH264-063J10 | Chr3:78927560-79078317 | FI593455,FI593454 | 150757 |
| CH264-304J10 | Chr3:78927574-79080614 | FI593321,FI593320 | 153040 |
| CH264-426I04 | Chr3:78947931-79092639 | FI593814,FI593813 | 144708 |
| CH264-214K02 | Chr3:78950395-79119047 | FI593315,FI593314 | 168652 |
| CH264-244F24 | Chr3:89818072-89978702 | FI593505,FI593504 | 160630 |
| CH264-006H16 | Chr3:89823339-89986673 | FI592799,FI592798 | 163334 |
| CH264-457G05 | Chr3:89823339-89993493 | FI594113,FI594112 | 170154 |
| CH264-128K03 | Chr3:89831817-89993494 | FI593353,FI593352 | 161677 |
| CH264-098C15 | Chr3:89831833-89993494 | FI593144,FI593143 | 161661 |
| CH264-432M19 | Chr3:89835851-90012548 | FI593836,FI593837 | 176697 |
| CH264-344B07 | Chr3:89845576-89993493 | FI593709,FI593708 | 147917 |
| CH264-297L23 | Chr3:89846617-90012558 | FI593233,FI593232 | 165941 |
| CH264-407O20 | Chr3:89850889-89993493 | FI593541,FI593542 | 142604 |
| CH264-153C10 | Chr3:89850891-90008330 | FI592843,FI592842 | 157439 |
| CH264-016K06 | Chr3:89850910-89993493 | FI592954,FI592953 | 142583 |
| CH264-059F22 | Chr3:89868219-90030724 | FI593374,FI593375 | 162505 |
| CH264-301F24 | Chr3:89874666-90030724 | FI593304,FI593305 | 156058 |
| CH264-171L21 | Chr3:89883311-90046121 | FI593005,FI593006 | 162810 |
| CH264-062N01 | Chr3:89887191-90051665 | FI593446,FI593447 | 164474 |
| CH264-239N21 | Chr3:89896240-90045968 | FI593490,FI593491 | 149728 |
| CH264-304O15 | Chr3:89910213-90056219 | FI593324,FI593325 | 146006 |
| CH264-100O12 | Chr3:89925440-90095056 | FI593156,FI593155 | 169616 |

|              |                        |                   |        |
|--------------|------------------------|-------------------|--------|
| CH264-431O04 | Chr3:89928252-90072048 | FI593824,FI593825 | 143796 |
| CH264-341M22 | Chr3:89929014-90086170 | FI593646,FI593647 | 157156 |
| CH264-463B02 | Chr3:89933331-90085918 | FI594165,FI594166 | 152587 |
| CH264-313A03 | Chr3:89953292-90108270 | FI593417,FI593416 | 154978 |
| CH264-325G07 | Chr3:89953292-90110549 | FI593540,FI593539 | 157257 |
| CH264-334H09 | Chr3:89953292-90122848 | FI593619,FI593618 | 169556 |
| CH264-267A03 | Chr3:89953326-90108288 | FI592921,FI592920 | 154962 |
| CH264-132G09 | Chr3:89963294-90124093 | FI593372,FI593373 | 160799 |
| CH264-468L10 | Chr3:89963294-90119634 | FI594189,FI594190 | 156340 |
| CH264-268C21 | Chr3:89967734-90119636 | FI592928,FI592927 | 151902 |
| CH264-014A07 | Chr3:89977412-90122864 | FI592887,FI592886 | 145452 |
| CH264-514C12 | Chr3:89978737-90124675 | FI593963,FI593962 | 145938 |
| CH264-180F20 | Chr3:90012693-90163116 | FI593113,FI593114 | 150423 |
| CH264-461J17 | Chr3:90026382-90174795 | FI594128,FI594127 | 148413 |
| CH264-072L01 | Chr3:90028943-90174795 | FI592793,FI592792 | 145852 |
| CH264-084J20 | Chr3:90028943-90174678 | FI592956,FI592955 | 145735 |
| CH264-228N16 | Chr3:90028943-90174787 | FI593410,FI593411 | 145844 |
| CH264-327J08 | Chr3:98618780-98765662 | FI594672,FI594673 | 146882 |
| CH264-027C14 | Chr3:98643564-98797147 | FI593775,FI593774 | 153583 |
| CH264-153I23 | Chr3:98644239-98793957 | FI594625,FI594624 | 149718 |
| CH264-420I15 | Chr3:98680443-98844558 | FI594658,FI594659 | 164115 |
| CH264-285P02 | Chr3:98693836-98858198 | FI594298,FI594299 | 164362 |
| CH264-525N24 | Chr3:98695958-98847114 | FI595462,FI595461 | 151156 |
| CH264-498F23 | Chr3:98706141-98858206 | FI595183,FI595184 | 152065 |
| CH264-034I13 | Chr3:98710268-98860206 | FI595276,FI595275 | 149938 |
| CH264-169K20 | Chr3:98712018-98892969 | FI594804,FI594805 | 180951 |
| CH264-304J17 | Chr3:98712018-98860199 | FI594487,FI594488 | 148181 |
| CH264-372B15 | Chr3:98712018-98860030 | FI594312,FI594313 | 148012 |
| CH264-018M12 | Chr3:98727644-98888636 | FI593693,FI593692 | 160992 |
| CH264-079C19 | Chr3:98738075-98889280 | FI594134,FI594135 | 151205 |
| CH264-162C13 | Chr3:98738075-98904323 | FI594707,FI594708 | 166248 |
| CH264-393L02 | Chr3:98738075-98889362 | FI594167,FI594168 | 151287 |
| CH264-265I05 | Chr3:98756608-98892963 | FI594822,FI594821 | 136355 |
| CH264-104J15 | Chr3:98756720-98899781 | FI594219,FI594218 | 143061 |
| CH264-150G14 | Chr3:98757128-98918706 | FI594614,FI594613 | 161578 |
| CH264-283J13 | Chr3:98757128-98904315 | FI594271,FI594270 | 147187 |
| CH264-213O22 | Chr3:98768615-98918066 | FI595149,FI595150 | 149451 |
| CH264-335L23 | Chr3:98780118-98949454 | FI594762,FI594763 | 169336 |
| CH264-369B09 | Chr3:98791155-98942719 | FI594305,FI594304 | 151564 |

|              |                        |                   |        |
|--------------|------------------------|-------------------|--------|
| CH264-427P04 | Chr3:98791155-98949465 | FI594749,FI594748 | 158310 |
| CH264-309L17 | Chr3:98793780-98942651 | FI594503,FI594504 | 148871 |
| CH264-139K01 | Chr3:98800472-98962389 | FI594532,FI594531 | 161917 |
| CH264-335B24 | Chr3:98800551-98966909 | FI594759,FI594758 | 166358 |
| CH264-289N06 | Chr3:98800564-98949397 | FI594314,FI594315 | 148833 |
| CH264-078P11 | Chr3:98805247-98962213 | FI594132,FI594133 | 156966 |
| CH264-156F14 | Chr3:98809667-98979087 | FI594632,FI594633 | 169420 |
| CH264-453D02 | Chr3:98809667-98972655 | FI596035,FI596034 | 162988 |
| CH264-499H21 | Chr3:98809667-98962389 | FI595188,FI595187 | 152722 |
| CH264-016E09 | Chr3:98839134-98993549 | FI595099,FI595098 | 154415 |
| CH264-441I09 | Chr3:98839134-98980112 | FI594850,FI594849 | 140978 |
| CH264-027E20 | Chr3:98845046-99003215 | FI593778,FI593779 | 158169 |
| CH264-009A16 | Chr3:98847833-99002790 | FI593601,FI593602 | 154957 |
| CH264-285H12 | Chr3:98847833-99002876 | FI594294,FI594295 | 155043 |
| CH264-505F09 | Chr3:98857414-99002876 | FI595262,FI595261 | 145462 |
| CH264-356M02 | Chr3:98860310-99003091 | FI594956,FI594957 | 142781 |
| CH264-497F18 | Chr3:98860356-99002876 | FI595171,FI595172 | 142520 |
| CH264-304H16 | Chr3:98889567-99043561 | FI594484,FI594483 | 153994 |
| CH264-396F08 | Chr3:98894173-99057347 | FI594473,FI594474 | 163174 |
| CH264-169J18 | Chr3:98897247-99044922 | FI594800,FI594801 | 147675 |
| CH264-018N16 | Chr3:98897414-99058087 | FI593695,FI593694 | 160673 |
| CH264-203M24 | Chr3:98899902-99058079 | FI594351,FI594352 | 158177 |
| CH264-186I16 | Chr3:98899903-99057366 | FI594917,FI594918 | 157463 |
| CH264-154D17 | Chr3:98901219-99043555 | FI594629,FI594628 | 142336 |
| CH264-327D16 | Chr3:98901219-99043549 | FI594664,FI594665 | 142330 |
| CH264-396J22 | Chr3:98901219-99044922 | FI594478,FI594477 | 143703 |
| CH264-051N11 | Chr3:98904447-99047559 | FI593957,FI593956 | 143112 |
| CH264-330L11 | Chr3:98913990-99084944 | FI594684,FI594683 | 170954 |
| CH264-419J12 | Chr3:98913992-99081628 | FI594655,FI594654 | 167636 |
| CH264-085L24 | Chr3:98919011-99081600 | FI594143,FI594142 | 162589 |
| CH264-159F19 | Chr3:98919011-99081613 | FI594700,FI594699 | 162602 |
| CH264-418K09 | Chr3:98942763-99104782 | FI594650,FI594651 | 162019 |
| CH264-503J12 | Chr3:98962463-99115955 | FI595203,FI595204 | 153492 |
| CH264-012G23 | Chr3:98980160-99139716 | FI593665,FI593664 | 159556 |
| CH264-099G11 | Chr3:98993848-99139721 | FI594209,FI594208 | 145873 |
| CH264-279A19 | Chr3:99037534-99198535 | FI596432,FI596433 | 161001 |
| CH264-375L15 | Chr3:99043570-99198535 | FI596222,FI596223 | 154965 |
| CH264-305I10 | Chr3:99045062-99200334 | FI596463,FI596462 | 155272 |
| CH264-027M12 | Chr3:99045914-99198536 | FI596156,FI596157 | 152622 |

|              |                        |                   |        |
|--------------|------------------------|-------------------|--------|
| CH264-209L22 | Chr3:99068165-99235856 | FI596376,FI596377 | 167691 |
| CH264-387C21 | Chr3:99081637-99235852 | FI596238,FI596239 | 154215 |
| CH264-117B09 | Chr3:99082882-99235845 | FI596272,FI596273 | 152963 |
| CH264-200E18 | Chr3:99085130-99244430 | FI596369,FI596368 | 159300 |
| CH264-030N13 | Chr3:99113179-99285593 | FI596160,FI596161 | 172414 |
| CH264-129G09 | Chr3:99161992-99336276 | FI594429,FI594430 | 174284 |
| CH264-068N23 | Chr3:99161997-99340628 | FI594049,FI594048 | 178631 |
| CH264-400C13 | Chr3:99187133-99340937 | FI596254,FI596255 | 153804 |
| CH264-356I07 | Chr3:99191645-99362217 | FI594953,FI594952 | 170572 |
| CH264-517K24 | Chr3:99191645-99340933 | FI595368,FI595367 | 149288 |
| CH264-080O05 | Chr3:99213401-99379800 | FI594137,FI594136 | 166399 |
| CH264-197B22 | Chr3:99219631-99379800 | FI594319,FI594320 | 160169 |
| CH264-316L19 | Chr3:99235340-99395661 | FI594566,FI594565 | 160321 |
| CH264-485L21 | Chr3:99235884-99395661 | FI596139,FI596138 | 159777 |
| CH264-472B19 | Chr3:99244440-99415047 | FI595000,FI594999 | 170607 |
| CH264-488F09 | Chr3:99244440-99401765 | FI595089,FI595088 | 157325 |
| CH264-127M16 | Chr3:99244448-99401754 | FI594422,FI594421 | 157306 |
| CH264-117C21 | Chr3:99244449-99407328 | FI594322,FI594321 | 162879 |
| CH264-348I14 | Chr3:99244450-99407844 | FI594868,FI594867 | 163394 |
| CH264-404F12 | Chr3:99244450-99395661 | FI594494,FI594493 | 151211 |
| CH264-026I13 | Chr3:99259161-99414321 | FI595194,FI595193 | 155160 |
| CH264-267E07 | Chr3:99259161-99416716 | FI594830,FI594829 | 157555 |
| CH264-318E13 | Chr3:99315811-99476554 | FI594573,FI594574 | 160743 |
| CH264-076P15 | Chr3:99315814-99472596 | FI594078,FI594079 | 156782 |
| CH264-046F13 | Chr3:99315822-99472596 | FI595381,FI595382 | 156774 |
| CH264-099I10 | Chr3:99351744-99520617 | FI594210,FI594211 | 168873 |
| CH264-306H23 | Chr3:99351744-99503036 | FI594491,FI594492 | 151292 |
| CH264-190B04 | Chr3:99352485-99513123 | FI594228,FI594229 | 160638 |
| CH264-122L07 | Chr3:99362688-99522511 | FI594341,FI594342 | 159823 |
| CH264-318A12 | Chr3:99362693-99518295 | FI594569,FI594570 | 155602 |
| CH264-322N23 | Chr3:99362693-99513123 | FI594598,FI594597 | 150430 |
| CH264-148H14 | Chr3:99373211-99531861 | FI594550,FI594549 | 158650 |
| CH264-161G23 | Chr3:99395859-99548904 | FI594703,FI594704 | 153045 |
| CH264-259I15 | Chr3:99401776-99549834 | FI594795,FI594794 | 148058 |
| CH264-140O23 | Chr3:99401779-99560697 | FI594536,FI594535 | 158918 |
| CH264-249I22 | Chr3:99401849-99570579 | FI594729,FI594728 | 168730 |
| CH264-195D03 | Chr3:99407341-99569262 | FI594252,FI594253 | 161921 |
| CH264-347I19 | Chr3:99408145-99556106 | FI594859,FI594860 | 147961 |
| CH264-318I16 | Chr3:99410358-99565958 | FI594578,FI594577 | 155600 |

|               |                          |                   |        |
|---------------|--------------------------|-------------------|--------|
| CH264-270G20  | Chr3:99414780-99565958   | FI594904,FI594903 | 151178 |
| CH264-447E22  | Chr3:99414791-99556106   | FI594865,FI594866 | 141315 |
| CH264-310J16  | Chr3:99415075-99560648   | FI594553,FI594554 | 145573 |
| CH264-342B23  | Chr3:99415085-99565958   | FI594785,FI594784 | 150873 |
| CH264-348D24  | Chr3:99418927-99556106   | FI594863,FI594864 | 137179 |
| CH264-129J19  | Chr3:99453361-99608361   | FI594437,FI594438 | 155000 |
| CH264-461C06  | Chr3:99454931-99623526   | FI594967,FI594966 | 168595 |
| CH264-428M23  | Chr3:99464642-99623286   | FI594756,FI594757 | 158644 |
| CH264-359M17  | Chr3:99464643-99630908   | FI594969,FI594968 | 166265 |
| CH264-357I05  | Chr3:99464646-99608201   | FI594965,FI594964 | 143555 |
| CH264-368A22  | Chr3:99465380-99608252   | FI594300,FI594301 | 142872 |
| CH264-415N01  | Chr3:99465380-99608252   | FI594583,FI594584 | 142872 |
| CH264-343H13  | Chr3:99472712-99608356   | FI594839,FI594840 | 135644 |
| CH264-215E16  | Chr3:99477081-99619322   | FI594431,FI594432 | 142241 |
| CH264-182A15  | Chr3:99479714-99623293   | FI594890,FI594889 | 143579 |
| CH264-424B12  | Chr3:99479717-99619322   | FI594678,FI594677 | 139605 |
| CH264-287F12  | Chr3:99479783-99638784   | FI594311,FI594310 | 159001 |
| CH264-345E06  | Chr3:99503059-99668702   | FI594848,FI594847 | 165643 |
| CH264-042E01  | Chr3:99509905-99658355   | FI593872,FI593873 | 148450 |
| CH264-517K08  | Chr3:99518321-99666370   | FI595364,FI595363 | 148049 |
| CH264-015D24  | Chr3:99518327-99678235   | FI593676,FI593677 | 159908 |
| CH264-074C20  | Chr3:99518327-99678226   | FI594061,FI594060 | 159899 |
| CH264-330K17  | Chr3:99550054-99691047   | FI594680,FI594679 | 140993 |
| CH264-522F11  | Chr3:99573119-99715480   | FI595396,FI595395 | 142361 |
| CH264-182B19  | Chr3:99586789-99753366   | FI594894,FI594893 | 166577 |
| CH264-285P03  | Chr3:99610172-99753386   | FI594302,FI594303 | 143214 |
| CH264-040J01  | Chr3:99610733-99756164   | FI593868,FI593869 | 145431 |
| CH264-234M20  | Chr3:99610733-99753398   | FI594616,FI594615 | 142665 |
| CH264-114P19  | Chr3:99623306-99775330   | FI594266,FI594267 | 152024 |
| CH264-027G15  | Chr3:99623604-99775166   | FI593782,FI593783 | 151562 |
| CH264-373J23  | Chr3:99630926-99794668   | FI596092,FI596093 | 163742 |
| CH264-124G16  | Chr3:99630928-99794668   | FI594357,FI594358 | 163740 |
| CH264-507C16  | Chr3:99633832-99783748   | FI595273,FI595274 | 149916 |
| CH264-373M02  | Chr3:99668736-99834140   | FI594317,FI594316 | 165404 |
| CH264-514L01  | Chr3:99678326-99823171   | FI595290,FI595289 | 144845 |
| CH264-156H02  | Chr3:99678368-99834272   | FI594637,FI594636 | 155904 |
| CH264-461A15* | Chr3:106783720-106949410 | FI594962,FI594963 | 165690 |
| CH264-521O15* | Chr3:106783722-106950858 | FI595391,FI595392 | 167136 |
| CH264-497L04* | Chr3:106783724-106949475 | FI595180,FI595179 | 165751 |

|               |                          |                   |        |
|---------------|--------------------------|-------------------|--------|
| CH264-350J22* | Chr3:106794605-106949410 | FI594878,FI594879 | 154805 |
| CH264-230G02* | Chr3:106796792-106952219 | FI594533,FI594534 | 155427 |
| CH264-511K13* | Chr3:106837477-107006688 | FI595285,FI595286 | 169211 |
| CH264-045K21* | Chr3:106854851-107022028 | FI595378,FI595377 | 167177 |
| CH264-136C12* | Chr3:106861986-107019300 | FI594507,FI594508 | 157314 |
| CH264-226J11* | Chr3:106861986-107027452 | FI594522,FI594521 | 165466 |
| CH264-376O20* | Chr3:106868789-107022041 | FI594383,FI594384 | 153252 |
| CH264-177B03* | Chr3:106872624-107019300 | FI594827,FI594828 | 146676 |
| CH264-189P14* | Chr3:106872624-107023402 | FI594225,FI594224 | 150778 |
| CH264-076J24* | Chr3:106886730-107050966 | FI594076,FI594077 | 164236 |
| CH264-491P22* | Chr3:106886730-107050966 | FI595163,FI595164 | 164236 |
| CH264-343E10* | Chr3:106886733-107047599 | FI594836,FI594835 | 160866 |
| CH264-051D08* | Chr3:106891544-107063656 | FI593953,FI593952 | 172112 |
| CH264-172O21* | Chr3:106891544-107050620 | FI594812,FI594811 | 159076 |
| CH264-407B06* | Chr3:106920683-107074415 | FI594505,FI594506 | 153732 |
| CH264-185E16* | Chr3:106939984-107095817 | FI594906,FI594905 | 155833 |
| CH264-448H22* | Chr3:106939986-107087895 | FI594870,FI594869 | 147909 |
| CH264-234M17* | Chr3:106947302-107105643 | FI594611,FI594612 | 158341 |
| CH264-422D04* | Chr3:106949502-107114897 | FI594671,FI594670 | 165395 |
| CH264-059E04* | Chr3:106950062-107107813 | FI593980,FI593981 | 157751 |
| CH264-497G21* | Chr3:106950062-107105654 | FI595176,FI595175 | 155592 |
| CH264-479M11* | Chr3:106952776-107105657 | FI595019,FI595020 | 152881 |
| CH264-075N24* | Chr3:106956344-107116759 | FI594065,FI594064 | 160415 |
| CH264-526G07* | Chr3:106956344-107105655 | FI595470,FI595469 | 149311 |
| CH264-421M19* | Chr3:106975458-107142725 | FI594666,FI594667 | 167267 |
| CH264-375B22* | Chr3:106991616-107142850 | FI594367,FI594368 | 151234 |
| CH264-108D04* | Chr3:106991762-107154428 | FI594231,FI594230 | 162666 |
| CH264-089B20* | Chr3:106991852-107154560 | FI594147,FI594146 | 162708 |
| CH264-285F02* | Chr3:107023590-107195096 | FI594291,FI594290 | 171506 |
| CH264-296K13* | Chr3:107027661-107183155 | FI594410,FI594409 | 155494 |
| CH264-506I01* | Chr3:107043776-107195098 | FI595265,FI595266 | 151322 |
| CH264-114L02* | Chr3:107051052-107218188 | FI594262,FI594263 | 167136 |
| CH264-203O14* | Chr3:107051375-107212225 | FI594356,FI594355 | 160850 |
| CH264-440N15* | Chr3:107053209-107207379 | FI594841,FI594842 | 154170 |
| CH264-018J19* | Chr3:107060288-107221013 | FI593689,FI593688 | 160725 |
| CH264-379E24* | Chr3:107065190-107214225 | FI594396,FI594395 | 149035 |
| CH264-518H02* | Chr3:107065190-107207395 | FI595375,FI595376 | 142205 |
| CH264-053F17* | Chr3:107074232-107221013 | FI593961,FI593960 | 146781 |
| CH264-182K13* | Chr3:107095850-107245918 | FI594898,FI594897 | 150068 |

|               |                          |                   |        |
|---------------|--------------------------|-------------------|--------|
| CH264-126B16* | Chr3:107105758-107282477 | FI594414,FI594413 | 176719 |
| CH264-357A13* | Chr3:107105762-107251995 | FI594961,FI594960 | 146233 |
| CH264-284N07* | Chr3:107105776-107278858 | FI594283,FI594282 | 173082 |
| CH264-239D21* | Chr3:107105858-107271242 | FI594639,FI594638 | 165384 |
| CH264-076F10* | Chr3:107117076-107282028 | FI594072,FI594073 | 164952 |
| CH264-494K13* | Chr3:107117076-107278855 | FI595168,FI595167 | 161779 |
| CH264-019B14* | Chr3:107130522-107306222 | FI593698,FI593699 | 175700 |
| CH264-221G15* | Chr3:107132071-107304756 | FI594449,FI594450 | 172685 |
| CH264-006A18* | Chr3:107143813-107307651 | FI594989,FI594990 | 163838 |
| CH264-006O09* | Chr3:107143813-107307767 | FI593589,FI593590 | 163954 |
| CH264-006M13* | Chr3:107143823-107307651 | FI593581,FI593582 | 163828 |
| CH264-377M10* | Chr3:107154585-107309115 | FI594387,FI594388 | 154530 |
| CH264-113L06* | Chr3:107154586-107308634 | FI594250,FI594251 | 154048 |
| CH264-519D15* | Chr3:107154596-107308774 | FI595387,FI595388 | 154178 |
| CH264-284I02* | Chr3:107154691-107316009 | FI594279,FI594278 | 161318 |
| CH264-466L13* | Chr3:107156824-107309116 | FI594991,FI594992 | 152292 |
| CH264-105K03* | Chr3:107156929-107316006 | FI594220,FI594221 | 159077 |
| CH264-447D23* | Chr3:107171525-107336949 | FI594862,FI594861 | 165424 |
| CH264-231P07* | Chr3:107172540-107336919 | FI594604,FI594603 | 164379 |
| CH264-497G06* | Chr3:107740657-107903984 | FI595798,FI595797 | 163327 |
| CH264-060J16* | Chr3:107753759-107911209 | FI595472,FI595471 | 157450 |
| CH264-390K14* | Chr3:107754430-107902172 | FI595675,FI595676 | 147742 |
| CH264-067C02* | Chr3:107767695-107934162 | FI595479,FI595480 | 166467 |
| CH264-155H16* | Chr3:107767891-107934162 | FI595417,FI595418 | 166271 |
| CH264-026A11* | Chr3:107774512-107944638 | FI595186,FI595185 | 170126 |
| CH264-353D14* | Chr3:107797180-107955745 | FI595996,FI595997 | 158565 |
| CH264-024B06* | Chr3:107800628-107955778 | FI595173,FI595174 | 155150 |
| CH264-125A02* | Chr3:107801931-107958705 | FI595211,FI595212 | 156774 |
| CH264-464G16* | Chr3:107810017-107971000 | FI596074,FI596075 | 160983 |
| CH264-316O05* | Chr3:107811283-107960780 | FI595815,FI595816 | 149497 |
| CH264-366D11* | Chr3:107824651-107977820 | FI596064,FI596065 | 153169 |
| CH264-249I21* | Chr3:107847641-108005641 | FI595420,FI595419 | 158000 |
| CH264-323A16* | Chr3:107850859-108005638 | FI595855,FI595856 | 154779 |
| CH264-496N23* | Chr3:107850901-107996123 | FI595795,FI595796 | 145222 |
| CH264-181C17* | Chr3:107868651-108033332 | FI595582,FI595583 | 164681 |
| CH264-319A09* | Chr3:107882682-108020889 | FI595839,FI595840 | 138207 |
| CH264-053N14* | Chr3:107887711-108033332 | FI595448,FI595447 | 145621 |
| CH264-344D02* | Chr3:107891608-108036973 | FI595965,FI595964 | 145365 |
| CH264-111G13* | Chr3:107905578-108053358 | FI595116,FI595117 | 147780 |



|               |                          |                   |        |
|---------------|--------------------------|-------------------|--------|
| CH264-256N08* | Chr3:107912628-108059959 | FI595435,FI595436 | 147331 |
| CH264-075E10* | Chr3:107959119-108105716 | FI595535,FI595536 | 146597 |
| CH264-007M07* | Chr3:107960814-108105721 | FI595006,FI595005 | 144907 |
| CH264-433I03* | Chr3:107977829-108120855 | FI595922,FI595921 | 143026 |
| CH264-179H18* | Chr3:107977950-108144360 | FI595572,FI595571 | 166410 |
| CH264-502N05* | Chr3:107978934-108116318 | FI596386,FI596387 | 137384 |
| CH264-506A15* | Chr3:107978942-108124972 | FI595866,FI595865 | 146030 |
| CH264-392K20* | Chr3:107979131-108119178 | FI595695,FI595694 | 140047 |
| CH264-306K09* | Chr3:107997182-108144345 | FI595768,FI595767 | 147163 |
| CH264-248C07* | Chr3:107997183-108144299 | FI595404,FI595405 | 147116 |
| CH264-004C22* | Chr3:108000237-108155904 | FI594981,FI594982 | 155667 |
| CH264-285C06* | Chr3:108000435-108144363 | FI595636,FI595635 | 143928 |
| CH264-402H15* | Chr3:108000435-108144345 | FI595757,FI595758 | 143910 |
| CH264-462L04* | Chr3:108005659-108166903 | FI596322,FI596323 | 161244 |
| CH264-293L05* | Chr3:108025015-108178090 | FI596451,FI596450 | 153075 |
| CH264-017M14* | Chr3:108033367-108197952 | FI596149,FI596148 | 164585 |
| CH264-442N13* | Chr3:108037013-108197947 | FI596294,FI596295 | 160934 |
| CH264-057G22* | Chr3:108043342-108199455 | FI596189,FI596188 | 156113 |
| CH264-239H12* | Chr3:108043342-108197949 | FI596404,FI596405 | 154607 |
| CH264-426M12* | Chr3:108052777-108199370 | FI596287,FI596286 | 146593 |
| CH264-333N02* | Chr3:108058371-108216508 | FI596167,FI596166 | 158137 |
| CH264-508P17* | Chr3:108059991-108197946 | FI596394,FI596395 | 137955 |
| CH264-077L15* | Chr3:108089501-108240908 | FI595539,FI595540 | 151407 |
| CH264-408F08* | Chr3:108089509-108240885 | FI595777,FI595778 | 151376 |
| CH264-055K02* | Chr3:108105748-108264412 | FI595452,FI595451 | 158664 |
| CH264-184I01* | Chr3:108105752-108264159 | FI595598,FI595599 | 158407 |
| CH264-299F05* | Chr3:108105752-108259172 | FI595708,FI595709 | 153420 |
| CH264-282I13* | Chr3:108105753-108259224 | FI595592,FI595593 | 153471 |
| CH264-458F12* | Chr3:108105753-108258131 | FI596051,FI596050 | 152378 |
| CH264-297J16* | Chr3:108105757-108264140 | FI595697,FI595696 | 158383 |
| CH264-196J24* | Chr3:108105762-108259240 | FI595670,FI595669 | 153478 |
| CH264-320D06* | Chr3:108105762-108279533 | FI595848,FI595847 | 173771 |
| CH264-203K09* | Chr3:108116474-108270852 | FI595052,FI595051 | 154378 |
| CH264-408C09* | Chr3:108125051-108275332 | FI595773,FI595774 | 150281 |
| CH264-183H06* | Chr3:108144739-108301924 | FI595591,FI595590 | 157185 |
| CH264-281M17* | Chr3:108321201-108427181 | FI596441,FI596440 | 105980 |
| CH264-065A14* | Chr3:108322769-108441310 | FI596213,FI596212 | 118541 |
| CH264-160H20* | Chr3:108322769-108453095 | FI596333,FI596332 | 130326 |
| CH264-321I14* | Chr3:108322792-108432827 | FI596150,FI596151 | 110035 |

|               |                          |                   |        |
|---------------|--------------------------|-------------------|--------|
| CH264-047F08* | Chr3:108322802-108432826 | FI596181,FI596180 | 110024 |
| CH264-079B12* | Chr3:108323575-108483109 | FI596224,FI596225 | 159534 |
| CH264-134F16* | Chr3:108323575-108483117 | FI596304,FI596305 | 159542 |
| CH264-368L15* | Chr3:108323575-108490624 | FI596207,FI596206 | 167049 |
| CH264-337K08* | Chr3:108324534-108473892 | FI596171,FI596170 | 149358 |
| CH264-295I01* | Chr3:108324627-108461418 | FI596455,FI596454 | 136791 |
| CH264-247B21* | Chr3:108328420-108488507 | FI596412,FI596413 | 160087 |
| CH264-471M13* | Chr3:108329979-108483109 | FI596346,FI596347 | 153130 |
| CH264-423K11* | Chr3:108333395-108453088 | FI596278,FI596279 | 119693 |
| CH264-164J13* | Chr3:108367845-108549158 | FI595441,FI595442 | 181313 |
| CH264-450J07* | Chr3:108391824-108552058 | FI596022,FI596023 | 160234 |
| CH264-125J17* | Chr3:108391838-108549158 | FI595214,FI595213 | 157320 |
| CH264-211C14* | Chr3:108396800-108546602 | FI595134,FI595133 | 149802 |
| CH264-396M07* | Chr3:108397731-108540955 | FI595710,FI595711 | 143224 |
| CH264-136M16* | Chr3:108426109-108587019 | FI595313,FI595314 | 160910 |
| CH264-046H23* | Chr3:108438513-108588664 | FI595386,FI595385 | 150151 |
| CH264-064I18* | Chr3:108438513-108594233 | FI595476,FI595475 | 155720 |
| CH264-116B01* | Chr3:108441916-108594232 | FI595135,FI595136 | 152316 |
| CH264-259O13* | Chr3:108441918-108594233 | FI595486,FI595485 | 152315 |
| CH264-018L01* | Chr3:108442313-108584162 | FI595110,FI595111 | 141849 |
| CH264-126C12* | Chr3:108442313-108601824 | FI595221,FI595222 | 159511 |
| CH264-400C23* | Chr3:108453321-108601824 | FI595750,FI595749 | 148503 |
| CH264-272F08* | Chr3:108463562-108624047 | FI595561,FI595562 | 160485 |
| CH264-433K14* | Chr3:108463562-108624144 | FI595925,FI595926 | 160582 |
| CH264-234J17* | Chr3:108465319-108612433 | FI595315,FI595316 | 147114 |
| CH264-214K10* | Chr3:108477112-108632168 | FI595153,FI595154 | 155056 |
| CH264-175E15* | Chr3:108488528-108632956 | FI595555,FI595556 | 144428 |
| CH264-171J16* | Chr3:108490652-108646138 | FI595511,FI595512 | 155486 |
| CH264-404J20* | Chr3:108490670-108651051 | FI595766,FI595765 | 160381 |
| CH264-022P10* | Chr3:108504645-108674637 | FI595170,FI595169 | 169992 |
| CH264-114F01* | Chr3:108510114-108670971 | FI595131,FI595132 | 160857 |
| CH264-331H24* | Chr3:108519804-108685398 | FI595899,FI595900 | 165594 |
| CH264-106C17* | Chr3:108526054-108673156 | FI595054,FI595053 | 147102 |
| CH264-218G15* | Chr3:108526054-108685406 | FI595224,FI595223 | 159352 |
| CH264-333P04* | Chr3:108526056-108677802 | FI595908,FI595907 | 151746 |
| CH264-244N22* | Chr3:108526057-108687789 | FI595346,FI595345 | 161732 |
| CH264-080E20* | Chr3:108527331-108666139 | FI595545,FI595546 | 138808 |
| CH264-173H24* | Chr3:108527358-108694778 | FI595519,FI595520 | 167420 |
| CH264-345C08* | Chr3:108534428-108673156 | FI595969,FI595968 | 138728 |

|               |                          |                   |        |
|---------------|--------------------------|-------------------|--------|
| CH264-248K19* | Chr3:108535377-108687789 | FI595409,FI595408 | 152412 |
| CH264-362G02* | Chr3:108535739-108677802 | FI596049,FI596048 | 142063 |
| CH264-360H23* | Chr3:108561949-108715946 | FI596040,FI596041 | 153997 |
| CH264-098F20* | Chr3:108564232-108733310 | FI595023,FI595022 | 169078 |
| CH264-415F10* | Chr3:108584234-108726288 | FI595826,FI595825 | 142054 |
| CH264-093O18* | Chr3:108584280-108746080 | FI595615,FI595614 | 161800 |
| CH264-015I10* | Chr3:108588762-108750909 | FI595095,FI595094 | 162147 |
| CH264-199G14* | Chr3:108594340-108746110 | FI595043,FI595044 | 151770 |
| CH264-439L14* | Chr3:108594340-108746118 | FI595962,FI595963 | 151778 |
| CH264-293P18* | Chr3:108608222-108754241 | FI595673,FI595674 | 146019 |
| CH264-459O20* | Chr3:108612470-108754241 | FI596055,FI596054 | 141771 |
| CH264-394N07* | Chr3:108616601-108782997 | FI595698,FI595699 | 166396 |
| CH264-286K14* | Chr3:108624184-108770807 | FI595648,FI595647 | 146623 |
| CH264-307A22* | Chr3:108632196-108782997 | FI595772,FI595771 | 150801 |
| CH264-337E04* | Chr3:108639989-108815668 | FI595927,FI595928 | 175679 |
| CH264-437J18* | Chr3:108671318-108833230 | FI595954,FI595955 | 161912 |
| CH264-034G03* | Chr3:108673167-108833271 | FI595267,FI595268 | 160104 |
| CH264-034H21* | Chr3:108673167-108833271 | FI595271,FI595272 | 160104 |
| CH264-444H07* | Chr3:108674718-108840210 | FI595990,FI595991 | 165492 |
| CH264-090H13* | Chr3:108675398-108840210 | FI595604,FI595605 | 164812 |
| CH264-119M12* | Chr3:108675398-108835972 | FI595152,FI595151 | 160574 |
| CH264-249H20* | Chr3:108675398-108833276 | FI595416,FI595415 | 157878 |
| CH264-397D05* | Chr3:108675398-108833276 | FI595715,FI595714 | 157878 |
| CH264-199D07* | Chr3:108685518-108844996 | FI595039,FI595040 | 159478 |
| CH264-349O21* | Chr3:108685518-108844996 | FI595976,FI595977 | 159478 |
| CH264-014M07* | Chr3:108687825-108844992 | FI595090,FI595091 | 157167 |
| CH264-013B20* | Chr3:108687882-108840210 | FI595082,FI595083 | 152328 |
| CH264-014H09* | Chr3:108694854-108850001 | FI595087,FI595086 | 155147 |
| CH264-519I11* | Chr3:108703915-108870511 | FI595936,FI595935 | 166596 |
| CH264-412B21* | Chr3:108707679-108874482 | FI595818,FI595817 | 166803 |
| CH264-462M21* | Chr3:108707679-108871038 | FI596070,FI596071 | 163359 |
| CH264-204G14* | Chr3:108707691-108870511 | FI595056,FI595055 | 162820 |
| CH264-477G14* | Chr3:108715959-108871040 | FI596127,FI596126 | 155081 |
| CH264-124F22* | Chr3:108715963-108874482 | FI595160,FI595159 | 158519 |
| CH264-102G04* | Chr3:108726444-108878258 | FI595045,FI595046 | 151814 |
| CH264-154F03* | Chr3:108726449-108888798 | FI595411,FI595410 | 162349 |
| CH264-270A03* | Chr3:108726461-108878258 | FI595526,FI595525 | 151797 |
| CH264-262G14* | Chr3:108733329-108888798 | FI595498,FI595497 | 155469 |
| CH264-469F13* | Chr3:108733331-108898858 | FI596094,FI596095 | 165527 |

|               |                          |                   |        |
|---------------|--------------------------|-------------------|--------|
| CH264-469F23* | Chr3:108733334-108898858 | FI596098,FI596099 | 165524 |
| CH264-101E17* | Chr3:108737419-108900402 | FI595038,FI595037 | 162983 |
| CH264-247O02* | Chr3:108737419-108900402 | FI595401,FI595400 | 162983 |
| CH264-273I15* | Chr3:108737419-108899310 | FI595565,FI595566 | 161891 |
| CH264-117C08* | Chr3:108743340-108898857 | FI595143,FI595144 | 155517 |
| CH264-289D08* | Chr3:108751506-108899310 | FI595660,FI595659 | 147804 |
| CH264-169F21* | Chr3:108756662-108908654 | FI595499,FI595500 | 151992 |
| CH264-256C15* | Chr3:108756662-108915119 | FI595431,FI595432 | 158457 |
| CH264-112I13* | Chr3:108783030-108931220 | FI595125,FI595124 | 148190 |
| CH264-317O01* | Chr3:108783030-108931862 | FI595828,FI595827 | 148832 |
| CH264-391M05* | Chr3:108793151-108960184 | FI595687,FI595688 | 167033 |
| CH264-095B04* | Chr3:108850054-108999265 | FI593060,FI593059 | 149211 |
| CH264-173K05* | Chr3:108872138-109029015 | FI593030,FI593029 | 156877 |
| CH264-134O20* | Chr3:108898877-109058780 | FI593428,FI593429 | 159903 |
| CH264-410P12* | Chr3:108898877-109058796 | FI595789,FI595790 | 159919 |
| CH264-425M24* | Chr3:108898877-109058797 | FI593801,FI593802 | 159920 |
| CH264-179K21* | Chr3:108900515-109052049 | FI595575,FI595574 | 151534 |
| CH264-272B15* | Chr3:108909603-109073181 | FI592936,FI592935 | 163578 |
| CH264-389I17* | Chr3:108922750-109073181 | FI594095,FI594094 | 150431 |
| CH264-420J12* | Chr3:108931878-109087783 | FI593718,FI593719 | 155905 |
| CH264-004N15* | Chr3:108936854-109095714 | FI592787,FI592786 | 158860 |
| CH264-179E13* | Chr3:108936854-109097796 | FI593110,FI593109 | 160942 |
| CH264-353O23* | Chr3:108936854-109095715 | FI596004,FI596005 | 158861 |
| CH264-438A21* | Chr3:108936854-109087783 | FI595959,FI595958 | 150929 |
| CH264-450D10* | Chr3:108936854-109087783 | FI594016,FI594017 | 150929 |
| CH264-084K21* | Chr3:108945690-109106940 | FI592960,FI592959 | 161250 |
| CH264-149P15* | Chr3:108950480-109106963 | FI592822,FI592823 | 156483 |
| CH264-087M24* | Chr3:108951016-109099944 | FI592988,FI592987 | 148928 |
| CH264-343L20* | Chr3:108957189-109107008 | FI593654,FI593655 | 149819 |
| CH264-048N22* | Chr3:108965729-109124106 | FI593267,FI593266 | 158377 |
| CH264-243J18* | Chr3:108975043-109143411 | FI593501,FI593500 | 168368 |
| CH264-258O07* | Chr3:108979105-109137723 | FI592853,FI592852 | 158618 |
| CH264-316K20* | Chr3:108979105-109124098 | FI593496,FI593497 | 144993 |
| CH264-392E19* | Chr3:108986971-109137723 | FI594123,FI594122 | 150752 |
| CH264-029J14* | Chr3:108995825-109143411 | FI593058,FI593057 | 147586 |
| CH264-287D04* | Chr3:108996544-109141256 | FI593188,FI593189 | 144712 |
| CH264-171M23* | Chr3:109006205-109152750 | FI593010,FI593009 | 146545 |
| CH264-361C08* | Chr3:109016418-109166503 | FI593823,FI593822 | 150085 |
| CH264-272E09* | Chr3:109021264-109166503 | FI592939,FI592940 | 145239 |

|               |                          |                   |        |
|---------------|--------------------------|-------------------|--------|
| CH264-252G17* | Chr3:109029372-109180129 | FI592825,FI592824 | 150757 |
| CH264-471L02* | Chr3:109029372-109183958 | FI593572,FI593571 | 154586 |
| CH264-505N17* | Chr3:109029372-109180466 | FI593866,FI593867 | 151094 |
| CH264-087M20* | Chr3:109029375-109183954 | FI592984,FI592983 | 154579 |
| CH264-175B08* | Chr3:109036649-109198466 | FI593037,FI593038 | 161817 |
| CH264-165F06* | Chr3:109036659-109186743 | FI592919,FI592918 | 150084 |
| CH264-068C08* | Chr3:109046456-109198265 | FI592769,FI592768 | 151809 |
| CH264-306D15* | Chr3:109058822-109213523 | FI593381,FI593380 | 154701 |
| CH264-141F16* | Chr3:109083148-109237060 | FI593452,FI593453 | 153912 |
| CH264-373F11* | Chr3:109090417-109237059 | FI594002,FI594003 | 146642 |
| CH264-320E01* | Chr3:109092226-109241740 | FI593513,FI593514 | 149514 |
| CH264-032O14* | Chr3:109096014-109252018 | FI593141,FI593142 | 156004 |
| CH264-426F02* | Chr3:109107180-109256159 | FI593809,FI593810 | 148979 |
| CH264-175C17* | Chr3:109124132-109278937 | FI593042,FI593041 | 154805 |
| CH264-300H18* | Chr3:109130463-109293979 | FI593301,FI593300 | 163516 |
| CH264-248C20* | Chr3:109218295-109377136 | FI594724,FI594725 | 158841 |
| CH264-187M19* | Chr3:109234411-109377136 | FI594921,FI594922 | 142725 |
| CH264-166N01* | Chr3:109241232-109390754 | FI594792,FI594793 | 149522 |
| CH264-286G20* | Chr3:109251682-109393094 | FI594307,FI594306 | 141412 |
| CH264-156I13* | Chr3:109251688-109401123 | FI595422,FI595421 | 149435 |
| CH264-180C22* | Chr3:109252467-109401123 | FI594832,FI594831 | 148656 |
| CH264-274O24* | Chr3:109252467-109401123 | FI595577,FI595576 | 148656 |
| CH264-327G15* | Chr3:109254378-109400831 | FI594669,FI594668 | 146453 |
| CH264-245A23* | Chr3:109257531-109393200 | FI594706,FI594705 | 135669 |
| CH264-362M15* | Chr3:109257534-109400828 | FI594273,FI594272 | 143294 |
| CH264-488M20* | Chr3:109257534-109393336 | FI595721,FI595720 | 135802 |
| CH264-090D24* | Chr3:109257536-109417040 | FI594149,FI594148 | 159504 |
| CH264-527K13* | Chr3:109257536-109398292 | FI595949,FI595948 | 140756 |
| CH264-103H11* | Chr3:109257541-109417423 | FI594217,FI594216 | 159882 |
| CH264-137G03* | Chr3:109271080-109418844 | FI594515,FI594516 | 147764 |
| CH264-137I01* | Chr3:109271086-109418834 | FI594523,FI594524 | 147748 |
| CH264-213D12* | Chr3:109271095-109415520 | FI594424,FI594423 | 144425 |
| CH264-405F09* | Chr3:109285607-109430337 | FI594498,FI594497 | 144730 |
| CH264-107H09* | Chr3:109285619-109432090 | FI594223,FI594222 | 146471 |
| CH264-323A23* | Chr3:109285619-109432093 | FI594649,FI594648 | 146474 |
| CH264-362O15* | Chr3:109285752-109415519 | FI594277,FI594276 | 129767 |
| CH264-113J03* | Chr3:109290179-109445238 | FI594247,FI594246 | 155059 |
| CH264-323P13* | Chr3:109290180-109445215 | FI594653,FI594652 | 155035 |
| CH264-022B11* | Chr3:109294116-109441323 | FI595114,FI595115 | 147207 |

Sheet1

|               |                          |                   |        |
|---------------|--------------------------|-------------------|--------|
| CH264-402O13* | Chr3:109298895-109441323 | FI594489,FI594490 | 142428 |
| CH264-410B21* | Chr3:109301569-109452711 | FI595786,FI595785 | 151142 |
| CH264-417P08* | Chr3:109313480-109441323 | FI594599,FI594600 | 127843 |
| CH264-012H21* | Chr3:109334390-109493210 | FI595078,FI595079 | 158820 |
| CH264-528D22  | Chr3:110285470-110429917 | FI595950,FI595951 | 144447 |
| CH264-158M24  | Chr3:112272204-112421443 | FI592851,FI592850 | 149239 |

---

\*Previously reported in Davis et al, 2010.
