# Supplementary material
Source: PubMed Central journal article supplement (PMC3113616)
Supplement: supp_esr043_SupplementaryTable3v3.pdf [file supp_esr043_SupplementaryTable3v3.pdf]

Supplementary Table 3. Discordant white-throated sparrow BAC clones mapped relative to the zebra finch genome assembly (taeGut1).

| Clone Name    | Type of rearrangement   | Chromosome arrangement | Position in zebra finch genome of 'left' BES | Strand | GenBank Ac# 'left' BES | Position in zebra finch genome of 'right' BES | Strand | GenBank Ac# 'right' BES | Distance between left and right BES (bp) |
|---------------|-------------------------|------------------------|----------------------------------------------|--------|------------------------|-----------------------------------------------|--------|-------------------------|------------------------------------------|
| CH264-502005  | Inversion               | not validated          | Chr3_random:443133-443290                    | -      | FI595199               | Chr3_random:568539-568936                     | -      | FI595200                | 125803                                   |
| CH264-311007  | Large/complex/Inversion | ZAL2                   | Chr3:24132417-24134946                       | -      | FI593405               | Chr3:71357906-71358584                        | +      | FI593404                | 47224367                                 |
| CH264-311005  | Large/complex/Inversion | ZAL2                   | Chr3:24134241-24134762                       | -      | FI593401               | Chr3:71357913-71358640                        | +      | FI593400                | 47224399                                 |
| CH264-347B21  | Large/complex/Inversion | ZAL2 <sup>m</sup>      | Chr3:24134926-24135766                       | -      | FI594855               | Chr3:99003136-99003971                        | +      | FI594856                | 74869045                                 |
| CH264-504J22  | Large/complex/Inversion | ZAL2 <sup>m</sup>      | Chr3:24135024-24135761                       | -      | FI595258               | Chr3:98993612-98994454                        | +      | FI595257                | 74859430                                 |
| CH264-268O01  | Large/complex/Inversion | ZAL2 <sup>m</sup>      | Chr3:24135029-24135768                       | -      | FI594891               | Chr3:98993622-98994417                        | +      | FI594892                | 74859388                                 |
| CH264-491O06  | Large/complex/Inversion | ZAL2 <sup>m</sup>      | Chr3:24138760-24139468                       | -      | FI595113               | Chr3:98995039-98995596                        | +      | FI595112                | 74856836                                 |
| CH264-381F01  | Large/complex/Inversion | ZAL2 <sup>m</sup>      | Chr3:24138794-24139566                       | -      | FI594403               | Chr3:98993642-98994417                        | +      | FI594404                | 74855623                                 |
| CH264-522G05  | Large/complex/Inversion | ZAL2 <sup>m</sup>      | Chr3:24138866-24139555                       | -      | FI596411               | Chr3:99024407-99024818                        | +      | FI596410                | 74885952                                 |
| CH264-228O04  | Large/complex/Inversion | ZAL2 <sup>m</sup>      | Chr3:24138868-24139559                       | -      | FI594526               | Chr3:99003241-99004104                        | +      | FI594525                | 74865236                                 |
| CH264-007N11  | Large/complex/Inversion | ZAL2 <sup>m</sup>      | Chr3:24138939-24139555                       | -      | FI593598               | Chr3:99003238-99003891                        | +      | FI593597                | 74864952                                 |
| CH264-485O22  | Large/complex/Inversion | ZAL2 <sup>m</sup>      | Chr3:24140937-24142485                       | -      | FI595076               | Chr3:99003151-99003924                        | +      | FI595077                | 74862987                                 |
| CH264-333H20  | Large/complex/Inversion | ZAL2 <sup>m</sup>      | Chr3:24146476-24147166                       | -      | FI594747               | Chr3:99003229-99003963                        | +      | FI594746                | 74857487                                 |
| CH264-319N01  | Large/complex/Inversion | ZAL2 <sup>m</sup>      | Chr3:24146477-24147166                       | -      | FI594582               | Chr3:99002905-99003646                        | +      | FI594581                | 74857169                                 |
| CH264-437L09  | Large/complex/Inversion | ZAL2 <sup>m</sup>      | Chr3:24146477-24147166                       | -      | FI594838               | Chr3:99002904-99003715                        | +      | FI594837                | 74857238                                 |
| CH264-517G05  | Large/complex/Inversion | ZAL2 <sup>m</sup>      | Chr3:24146477-24147166                       | -      | FI595360               | Chr3:98993637-98994460                        | +      | FI595359                | 74847983                                 |
| CH264-229H07  | Large/complex/Inversion | ZAL2 <sup>m</sup>      | Chr3:24146558-24147347                       | -      | FI594530               | Chr3:98995039-98995596                        | +      | FI594529                | 74849038                                 |
| CH264-136A15  | Large/complex/Inversion | ZAL2 <sup>m</sup>      | Chr3:24146561-24147332                       | -      | FI594456               | Chr3:99003134-99003960                        | +      | FI594455                | 74857399                                 |
| CH264-060L08  | Large/complex/Inversion | ZAL2 <sup>m</sup>      | Chr3:24158393-24158882                       | -      | FI596201               | Chr3:99020512-99021100                        | +      | FI596200                | 74862707                                 |
| CH264-372H20  | Large/complex/Inversion | ZAL2                   | Chr3:24158450-24158864                       | -      | FI593938               | Chr3:71358008-71358649                        | +      | FI593939                | 47200199                                 |
| CH264-057M20  | Large/complex/Inversion | ZAL2 <sup>m</sup>      | Chr3:24158701-24158866                       | -      | FI596197               | Chr3:99020512-99021236                        | +      | FI596196                | 74862535                                 |
| CH264-196K03  | Large/complex/Inversion | ZAL2 <sup>m</sup>      | Chr3:24164583-24165324                       | -      | FI596361               | Chr3:99024289-99024818                        | +      | FI596360                | 74862035                                 |
| CH264-526J03  | Large/complex/Inversion | ZAL2 <sup>m</sup>      | Chr3:24167512-24168252                       | -      | FI596415               | Chr3:99027788-99028558                        | +      | FI596414                | 74861046                                 |
| CH264-395P16  | Large/complex/Inversion | ZAL2 <sup>m</sup>      | Chr3:24193911-24194634                       | -      | FI596251               | Chr3:99045065-99045743                        | +      | FI596250                | 74851832                                 |
| CH264-220G22  | Large/complex/Inversion | ZAL2 <sup>m</sup>      | Chr3:24197063-24197661                       | -      | FI596389               | Chr3:99057400-99058231                        | +      | FI596388                | 74861168                                 |
| CH264-343P13  | Large/complex/Inversion | ZAL2                   | Chr3:24204502-24204947                       | -      | FI593704               | Chr3:71414167-71414172                        | +      | FI593705                | 47210210                                 |
| CH264-344G03  | Large/complex/Inversion | ZAL2                   | Chr3:24209550-24209835                       | -      | FI593717               | Chr3:71412676-71413274                        | +      | FI593716                | 47203724                                 |
| CH264-261H02  | Large/complex/Inversion | ZAL2                   | Chr3:24212893-24213219                       | -      | FI592909               | Chr3:71419602-71420027                        | +      | FI592908                | 47207134                                 |
| CH264-358D02  | Large/complex/Inversion | ZAL2                   | Chr3:24251194-24251796                       | -      | FI593811               | Chr3:71463420-71464237                        | +      | FI593812                | 47213043                                 |
| CH264-377H05  | Large/complex/Inversion | ZAL2                   | Chr3:24251250-24251796                       | -      | FI594022               | Chr3:71442997-71443654                        | +      | FI594023                | 47192404                                 |
| CH264-499B18  | Large/complex/Inversion | ZAL2                   | Chr3:24268653-24269262                       | -      | FI593772               | Chr3:71463415-71464150                        | +      | FI593773                | 47195497                                 |
| CH264-237M15  | Insertion/deletion      | ZAL2/2 <sup>m</sup>    | Chr3:33656529-33657223                       | +      | FI593482               | Chr3:33905867-33906465                        | -      | FI593483                | 249936                                   |
| CH264-365C14  | Insertion/deletion      | ZAL2/2 <sup>m</sup>    | Chr3:33671346-33672034                       | +      | FI593903               | Chr3:33915896-33916393                        | -      | FI593902                | 245047                                   |
| CH264-204A16  | Insertion/deletion      | ZAL2/2 <sup>m</sup>    | Chr3:33671355-33672094                       | +      | FI593231               | Chr3:33926092-33926859                        | -      | FI593230                | 255504                                   |
| CH264-434G02  | Insertion/deletion      | ZAL2/2 <sup>m</sup>    | Chr3:33688155-33688966                       | +      | FI593844               | Chr3:33935638-33936281                        | -      | FI593845                | 248126                                   |
| CH264-021L21  | Insertion/deletion      | ZAL2/2 <sup>m</sup>    | Chr3:33688156-33688907                       | +      | FI592969               | Chr3:33935665-33936281                        | -      | FI592970                | 248125                                   |
| CH264-411B03  | Insertion/deletion      | ZAL2/2 <sup>m</sup>    | Chr3:33688156-33688712                       | +      | FI593612               | Chr3:33938640-33939126                        | -      | FI593613                | 250970                                   |
| CH264-417G06  | Insertion/deletion      | ZAL2/2 <sup>m</sup>    | Chr3:33693635-33694420                       | +      | FI593653               | Chr3:33938455-33939126                        | -      | FI593652                | 245491                                   |
| CH264-464P06  | Insertion/deletion      | ZAL2/2 <sup>m</sup>    | Chr3:33694441-33695136                       | +      | FI594174               | Chr3:33938467-33939126                        | -      | FI594173                | 244685                                   |
| CH264-484J23  | Insertion/deletion      | ZAL2/2 <sup>m</sup>    | Chr3:33694441-33695044                       | +      | FI593658               | Chr3:33938448-33939126                        | -      | FI593659                | 244685                                   |
| CH264-141P12  | Insertion/deletion      | ZAL2/2 <sup>m</sup>    | Chr3:33694467-33695109                       | +      | FI593457               | Chr3:33960628-33961362                        | -      | FI593456                | 266895                                   |
| CH264-513I24  | Insertion/deletion      | ZAL2/2 <sup>m</sup>    | Chr3:33695204-33695775                       | +      | FI593954               | Chr3:33938640-33939126                        | -      | FI593955                | 243922                                   |
| CH264-174C18  | Insertion/deletion      | ZAL2/2 <sup>m</sup>    | Chr3:33695781-33696229                       | +      | FI593033               | Chr3:33938640-33939126                        | -      | FI593034                | 243345                                   |
| CH264-210E08  | Insertion/deletion      | ZAL2/2 <sup>m</sup>    | Chr3:33695827-33696507                       | +      | FI593295               | Chr3:33960594-33961371                        | -      | FI593294                | 265544                                   |
| CH264-522F23  | Insertion/deletion      | ZAL2/2 <sup>m</sup>    | Chr3:33697109-33697906                       | +      | FI594051               | Chr3:33938640-33939126                        | -      | FI594050                | 242017                                   |
| CH264-152I18  | Insertion/deletion      | ZAL2/2 <sup>m</sup>    | Chr3:33697391-33697901                       | +      | FI592835               | Chr3:33960686-33961277                        | -      | FI592834                | 263886                                   |
| CH264-488J02  | Insertion/deletion      | ZAL2/2 <sup>m</sup>    | Chr3:33816796-33817532                       | +      | FI593666               | Chr3:34037562-34038010                        | -      | FI593667                | 221214                                   |
| CH264-001L12  | Insertion/deletion      | ZAL2/2 <sup>m</sup>    | Chr3:33816808-33817543                       | +      | FI592767               | Chr3:34034693-34035297                        | -      | FI592766                | 218489                                   |
| CH264-294F12* | Inversion               | not validated          | Chr3:69998565-69999396                       | -      | FI594393               | Chr3:70236695-70237252                        | -      | FI594394                | 238687                                   |
| CH264-050H19* | Inversion               | not validated          | Chr3:69998765-69999343                       | -      | FI593948               | Chr3:70236772-70237153                        | -      | FI593949                | 238388                                   |
| CH264-338K03* | Inversion               | not validated          | Chr3:70002398-70003122                       | -      | FI594770               | Chr3:70236695-70237252                        | -      | FI594771                | 234854                                   |
| CH264-193A09* | Large/complex/Inversion | ZAL2/2 <sup>m</sup>    | Chr3:70136124-70136888                       | +      | FI594241               | Chr3:108308519-108308780                      | +      | FI594240                | 38172656                                 |
| CH264-241F09* | Large/complex/Inversion | ZAL2/2 <sup>m</sup>    | Chr3:70138344-70138786                       | +      | FI594647               | Chr3:108308226-108308599                      | +      | FI594646                | 38170255                                 |
| CH264-295O20* | Large/complex/Inversion | ZAL2/2 <sup>m</sup>    | Chr3:70138344-70138560                       | +      | FI594406               | Chr3:108308226-108308599                      | +      | FI594405                | 38170255                                 |
| CH264-193M17* | Large/complex/Inversion | ZAL2/2 <sup>m</sup>    | Chr3:70141656-70142524                       | +      | FI594244               | Chr3:108301951-108302800                      | +      | FI594245                | 38161144                                 |
| CH264-264M01* | Large/complex/Inversion | ZAL2/2 <sup>m</sup>    | Chr3:70142579-70143384                       | +      | FI594817               | Chr3:108289692-108290510                      | +      | FI594818                | 38147931                                 |
| CH264-408H12* | Large/complex/Inversion | ZAL2/2 <sup>m</sup>    | Chr3:70142597-70143377                       | +      | FI594560               | Chr3:108308218-108308917                      | +      | FI594559                | 38166320                                 |
| CH264-007L11* | Large/complex/Inversion | ZAL2/2 <sup>m</sup>    | Chr3:70160271-70161088                       | +      | FI593593               | Chr3:108303144-108303825                      | +      | FI593594                | 38143554                                 |
| CH264-164H06* | Large/complex/Inversion | ZAL2/2 <sup>m</sup>    | Chr3:70160271-70161091                       | +      | FI594731               | Chr3:108284808-108285664                      | +      | FI594730                | 38125393                                 |
| CH264-295J19* | Large/complex/Inversion | ZAL2/2 <sup>m</sup>    | Chr3:70160271-70161121                       | +      | FI594397               | Chr3:108298978-108299803                      | +      | FI594398                | 38139532                                 |

|               |                         |                     |                        |   |          |                          |   |          |          |
|---------------|-------------------------|---------------------|------------------------|---|----------|--------------------------|---|----------|----------|
| CH264-030J07* | Large/complex/Inversion | ZAL2/2 <sup>m</sup> | Chr3:70160383-70160939 | + | FI593849 | Chr3:108289692-108290476 | + | FI593848 | 38130093 |
| CH264-146E20* | Large/complex/Inversion | ZAL2/2 <sup>m</sup> | Chr3:70160617-70161982 | + | FI594548 | Chr3:108289692-108290507 | + | FI594547 | 38129890 |
| CH264-376H22* | Large/complex/Inversion | ZAL2/2 <sup>m</sup> | Chr3:70160617-70161982 | + | FI594380 | Chr3:108289696-108290446 | + | FI594379 | 38129829 |
| CH264-425J06* | Large/complex/Inversion | ZAL2/2 <sup>m</sup> | Chr3:70160617-70161982 | + | FI594690 | Chr3:108289692-108290487 | + | FI594689 | 38129870 |
| CH264-217J11* | Large/complex/Inversion | ZAL2/2 <sup>m</sup> | Chr3:70160641-70161982 | + | FI594440 | Chr3:108279566-108280209 | + | FI594439 | 38119568 |
| CH264-055H23* | Large/complex/Inversion | ZAL2/2 <sup>m</sup> | Chr3:70162912-70163447 | + | FI593969 | Chr3:108301952-108302493 | + | FI593968 | 38139581 |
| CH264-379O21* | Large/complex/Inversion | ZAL2/2 <sup>m</sup> | Chr3:70167996-70168800 | + | FI594400 | Chr3:108289697-108290527 | + | FI594399 | 38122531 |
| CH264-005A12* | Large/complex/Inversion | ZAL2/2 <sup>m</sup> | Chr3:70171943-70172547 | + | FI593574 | Chr3:108279557-108280179 | + | FI593573 | 38108236 |
| CH264-077111* | Large/complex/Inversion | ZAL2/2 <sup>m</sup> | Chr3:70171951-70172747 | + | FI594081 | Chr3:108284135-108284867 | + | FI594080 | 38112916 |
| CH264-409H01* | Large/complex/Inversion | ZAL2/2 <sup>m</sup> | Chr3:70171952-70172731 | + | FI594568 | Chr3:108289692-108290450 | + | FI594567 | 38118498 |
| CH264-283E09* | Large/complex/Inversion | ZAL2/2 <sup>m</sup> | Chr3:70171974-70172731 | + | FI594928 | Chr3:108279568-108280209 | + | FI594927 | 38108235 |
| CH264-331O20* | Large/complex/Inversion | ZAL2/2 <sup>m</sup> | Chr3:70171974-70172743 | + | FI594691 | Chr3:108275369-108276189 | + | FI594692 | 38104215 |
| CH264-424O08* | Large/complex/Inversion | ZAL2/2 <sup>m</sup> | Chr3:70171974-70172745 | + | FI594681 | Chr3:108270894-108271656 | + | FI594682 | 38099682 |
| CH264-226A16* | Large/complex/Inversion | ZAL2/2 <sup>m</sup> | Chr3:70172007-70172754 | + | FI594514 | Chr3:108264611-108265263 | + | FI594513 | 38093256 |
| CH264-063M06* | Large/complex/Inversion | ZAL2/2 <sup>m</sup> | Chr3:70179860-70180398 | + | FI594040 | Chr3:108264948-108265660 | + | FI594041 | 38085800 |
| CH264-472P13* | Large/complex/Inversion | ZAL2/2 <sup>m</sup> | Chr3:70186674-70187532 | + | FI595004 | Chr3:108254472-108255326 | + | FI595003 | 38068652 |
| CH264-450F21* | Large/complex/Inversion | ZAL2/2 <sup>m</sup> | Chr3:70186675-70187446 | + | FI594932 | Chr3:108279566-108280209 | + | FI594931 | 38093534 |
| CH264-132C20* | Large/complex/Inversion | ZAL2/2 <sup>m</sup> | Chr3:70186680-70187561 | + | FI594448 | Chr3:108258156-108258932 | + | FI594447 | 38072252 |
| CH264-181G14* | Large/complex/Inversion | ZAL2/2 <sup>m</sup> | Chr3:70216864-70217585 | + | FI594886 | Chr3:108241714-108242184 | + | FI594885 | 38025320 |
| CH264-172M01* | Large/complex/Inversion | ZAL2/2 <sup>m</sup> | Chr3:70220653-70221442 | + | FI594808 | Chr3:108224489-108225318 | + | FI594809 | 38004665 |
| CH264-200L13* | Large/complex/Inversion | ZAL2/2 <sup>m</sup> | Chr3:70248346-70248610 | + | FI594328 | Chr3:108199482-108199974 | + | FI594327 | 37951628 |
| CH264-126E12* | Large/complex/Inversion | ZAL2/2 <sup>m</sup> | Chr3:70262189-70262686 | + | FI594417 | Chr3:108178117-108178833 | + | FI594418 | 37916644 |
| CH264-056E14* | Large/complex/Inversion | ZAL2/2 <sup>m</sup> | Chr3:70269043-70269725 | + | FI595456 | Chr3:108166923-108167685 | + | FI595455 | 37898642 |
| CH264-478H21* | Large/complex/Inversion | ZAL2/2 <sup>m</sup> | Chr3:70279562-70280326 | - | FI596354 | Chr3:108357154-108357998 | - | FI596355 | 38078436 |
| CH264-121C23* | Large/complex/Inversion | ZAL2/2 <sup>m</sup> | Chr3:70279731-70280285 | - | FI596285 | Chr3:108370405-108370952 | - | FI596284 | 38091221 |
| CH264-277M21* | Large/complex/Inversion | ZAL2/2 <sup>m</sup> | Chr3:70279731-70280135 | - | FI596429 | Chr3:108367006-108367831 | - | FI596428 | 38088100 |
| CH264-327D24* | Large/complex/Inversion | ZAL2/2 <sup>m</sup> | Chr3:70279731-70280171 | - | FI596159 | Chr3:108357336-108358010 | - | FI596158 | 38078279 |
| CH264-362D03* | Large/complex/Inversion | ZAL2/2 <sup>m</sup> | Chr3:70279731-70280316 | - | FI596195 | Chr3:108367003-108367836 | - | FI596194 | 38088105 |
| CH264-060N14* | Large/complex/Inversion | ZAL2/2 <sup>m</sup> | Chr3:70281419-70282341 | - | FI596204 | Chr3:108370693-108370952 | - | FI596205 | 38089533 |
| CH264-462L21* | Large/complex/Inversion | ZAL2/2 <sup>m</sup> | Chr3:70281438-70282354 | - | FI596326 | Chr3:108363400-108364228 | - | FI596327 | 38082790 |
| CH264-116B09* | Large/complex/Inversion | ZAL2/2 <sup>m</sup> | Chr3:70281456-70282341 | - | FI596265 | Chr3:108366922-108367838 | - | FI596264 | 38086382 |
| CH264-083G03* | Large/complex/Inversion | ZAL2/2 <sup>m</sup> | Chr3:70281551-70282341 | - | FI596233 | Chr3:108370405-108370952 | - | FI596232 | 38089401 |
| CH264-426M04* | Large/complex/Inversion | ZAL2/2 <sup>m</sup> | Chr3:70281551-70282357 | - | FI596282 | Chr3:108370405-108370952 | - | FI596283 | 38089401 |
| CH264-415G01* | Large/complex/Inversion | ZAL2/2 <sup>m</sup> | Chr3:70281631-70282341 | - | FI596271 | Chr3:108357115-108358009 | - | FI596270 | 38076378 |
| CH264-418P19* | Large/complex/Inversion | ZAL2/2 <sup>m</sup> | Chr3:70289477-70290318 | - | FI596275 | Chr3:108357190-108357996 | - | FI596274 | 38068519 |
| CH264-439G21* | Large/complex/Inversion | ZAL2/2 <sup>m</sup> | Chr3:70289708-70290318 | - | FI596291 | Chr3:108357227-108358011 | - | FI596290 | 38068303 |

\*Previously reported in Davis et al, 2010.
