# Supplementary material
Source: PubMed Central journal article supplement (PMC3113616)
Supplement: supp_esr043_SupplementaryTable4n.pdf [file supp_esr043_SupplementaryTable4n.pdf]

Supplementary Table 4. Novel PCR primers used to phase BAC clones.

| Phasing Target                                                                                                   | Forward Primer                          | Reverse Primer                           | Annealing Temp. (°C) |
|------------------------------------------------------------------------------------------------------------------|-----------------------------------------|------------------------------------------|----------------------|
| AC237227                                                                                                         | TGTAAAACGACGGCCAGTCAGCAGGGATAATAGCATTG  | CAGGAAACAGCTATGACCGCTAGACTGGATGCTTCCTAC  | 55°                  |
| AC237227                                                                                                         | TGTAAAACGACGGCCAGTTCATGAACCAGAGATGAACAC | CAGGAAACAGCTATGACCCATCTTAATGCCCTAATGGTC  | 55°                  |
| AC235995-AC235522 and<br>AC236248-AC235996 contigs                                                               | TGTAAAACGACGGCCAGTGCAGGAGAGAAGAGGATTTAG | CAGGAAACAGCTATGACCTACAAGTTGAGGCAAGACAAG  | 55°                  |
| AC235926-AC235590 and<br>AC235708-AC236860 contigs                                                               | TGTAAAACGACGGCCAGTCGCACTAAGTATCATCTGCTC | CAGGAAACAGCTATGACCTCAGCTATTTTCATCAGCTCAG | 55°                  |
| AC235941-AC236052-AC236251-<br>AC236857-AC235775 and<br>AC236955-AC237122-AC235931-<br>AC236690-AC235720 contigs | TGTAAAACGACGGCCAGTTGCAGTGTTAGTACTGCTTCC | CAGGAAACAGCTATGACCGACAGAACATCTCCCTTGAAC  | 55°                  |
| AC235519-AC235930 and<br>AC235707-AC236606 contigs                                                               | TGTAAAACGACGGCCAGTCTGTTTAGAGGCAATGTTGTG | CAGGAAACAGCTATGACCATACAGCCAAGACAAGGCTAC  | 55°                  |

Note that the primers are 5' tagged with the M13F or M13R sequences.
