# Supplementary material
Source: PubMed Central journal article supplement (PMC3113616)
Supplement: supp_esr043_SupplementaryTable5n.pdf [file supp_esr043_SupplementaryTable5n.pdf]

Supplementary Table 5. ZAL2 versus ZAL2m and ZAL2 versus zebra finch divergence.

| Window (10 kb) | ZAL2-ZAL2m<br>aligned sites | ZAL2-ZAL2m<br>K2P | ZAL2-zebra finch<br>aligned sites | ZAL2-zebra finch<br>K2P |
|----------------|-----------------------------|-------------------|-----------------------------------|-------------------------|
| 1              | 0                           | n.d.              | 6627                              | 0.1018                  |
| 2              | 0                           | n.d.              | 5638                              | 0.1004                  |
| 3              | 4891                        | 0.006             | 8589                              | 0.11                    |
| 4              | 9969                        | 0.0072            | 8664                              | 0.1094                  |
| 5              | 9938                        | 0.0049            | 9121                              | 0.1154                  |
| 6              | 8628                        | 0.0055            | 8362                              | 0.1059                  |
| 7              | 9270                        | 0.0061            | 8785                              | 0.1054                  |
| 8              | 8819                        | 0.0033            | 7600                              | 0.087                   |
| 9              | 9881                        | 0.0046            | 9660                              | 0.0798                  |
| 10             | 9979                        | 0.0017            | 9781                              | 0.0714                  |
| 11             | 9961                        | 0.003             | 8772                              | 0.098                   |
| 12             | 9164                        | 0.0035            | 8116                              | 0.0954                  |
| 13             | 9995                        | 0.0045            | 8732                              | 0.0886                  |
| 14             | 9996                        | 0.0047            | 9692                              | 0.0867                  |
| 15             | 9812                        | 0.0025            | 8786                              | 0.106                   |
| 16             | 10000                       | 0.0039            | 9164                              | 0.0932                  |
| 17             | 1272                        | 0.0048            | 851                               | 0.0821                  |
| 18             | 0                           | n.d.              | 0                                 | n.d.                    |
| 19             | 0                           | n.d.              | 0                                 | n.d.                    |
| 20             | 0                           | n.d.              | 0                                 | n.d.                    |
| 21             | 0                           | n.d.              | 0                                 | n.d.                    |
| 22             | 0                           | n.d.              | 7699                              | 0.0914                  |
| 23             | 6936                        | 0.0039            | 9789                              | 0.0767                  |
| 24             | 9417                        | 0.0057            | 9668                              | 0.103                   |
| 25             | 7622                        | 0.0054            | 7600                              | 0.0792                  |
| 26             | 9996                        | 0.0028            | 9773                              | 0.0744                  |
| 27             | 9995                        | 0.0051            | 9691                              | 0.0946                  |
| 28             | 9990                        | 0.0041            | 9705                              | 0.0922                  |
| 29             | 9999                        | 0.0033            | 9793                              | 0.091                   |
| 30             | 9696                        | 0.0064            | 9559                              | 0.0815                  |
| 31             | 9686                        | 0.007             | 9311                              | 0.1044                  |
| 32             | 9995                        | 0.0028            | 9865                              | 0.0944                  |
| 33             | 9870                        | 0.0033            | 9649                              | 0.1107                  |
| 34             | 9658                        | 0.0039            | 9314                              | 0.0897                  |
| 35             | 9999                        | 0.0032            | 9691                              | 0.1055                  |
| 36             | 9983                        | 0.0032            | 9609                              | 0.0781                  |
| 37             | 9976                        | 0.0025            | 9621                              | 0.0864                  |
| 38             | 9913                        | 0.0026            | 9368                              | 0.1046                  |
| 39             | 9949                        | 0.0036            | 9383                              | 0.1068                  |
| 40             | 9795                        | 0.003             | 9301                              | 0.0925                  |
| 41             | 9922                        | 0.0043            | 9601                              | 0.0948                  |
| 42             | 9999                        | 0.0021            | 9599                              | 0.0983                  |
| 43             | 9989                        | 0.0038            | 9214                              | 0.1022                  |
| 44             | 9999                        | 0.0025            | 9732                              | 0.1074                  |
| 45             | 9996                        | 0.0041            | 9596                              | 0.0863                  |
| 46             | 9986                        | 0.003             | 9799                              | 0.0878                  |
| 47             | 9493                        | 0.0041            | 9325                              | 0.0783                  |
| 48             | 0                           | n.d.              | 0                                 | n.d.                    |

|     |       |        |      |        |
|-----|-------|--------|------|--------|
| 49  | 0     | n.d.   | 0    | n.d.   |
| 50  | 0     | n.d.   | 0    | n.d.   |
| 51  | 0     | n.d.   | 0    | n.d.   |
| 52  | 234   | 0.0043 | 232  | 0.1267 |
| 53  | 9689  | 0.002  | 6998 | 0.0506 |
| 54  | 9733  | 0.0025 | 9530 | 0.0592 |
| 55  | 9991  | 0.0039 | 9348 | 0.0753 |
| 56  | 9996  | 0.0031 | 9735 | 0.0828 |
| 57  | 9988  | 0.003  | 9177 | 0.0831 |
| 58  | 9814  | 0.0013 | 9495 | 0.0691 |
| 59  | 9836  | 0.001  | 8860 | 0.0731 |
| 60  | 9998  | 0.0009 | 9843 | 0.078  |
| 61  | 9973  | 0.0024 | 9631 | 0.0672 |
| 62  | 9518  | 0.0026 | 9265 | 0.0534 |
| 63  | 9814  | 0.0018 | 9074 | 0.1004 |
| 64  | 9944  | 0.0044 | 9681 | 0.0881 |
| 65  | 9927  | 0.002  | 9457 | 0.0809 |
| 66  | 9946  | 0.0033 | 9776 | 0.0909 |
| 67  | 9990  | 0.0029 | 9708 | 0.0774 |
| 68  | 9997  | 0.0021 | 9368 | 0.0901 |
| 69  | 10000 | 0.0022 | 9425 | 0.0816 |
| 70  | 9994  | 0.0019 | 9642 | 0.0906 |
| 71  | 9787  | 0.004  | 9233 | 0.0895 |
| 72  | 9992  | 0.0029 | 9294 | 0.086  |
| 73  | 9996  | 0.0032 | 9779 | 0.0881 |
| 74  | 9985  | 0.0035 | 9536 | 0.1133 |
| 75  | 9973  | 0.003  | 9751 | 0.086  |
| 76  | 9997  | 0.004  | 9829 | 0.0943 |
| 77  | 10000 | 0.005  | 6756 | 0.085  |
| 78  | 10000 | 0.0043 | 9312 | 0.1068 |
| 79  | 9994  | 0.0043 | 9754 | 0.089  |
| 80  | 9824  | 0.0026 | 9596 | 0.0786 |
| 81  | 9671  | 0.0032 | 9401 | 0.0769 |
| 82  | 756   | 0.004  | 9460 | 0.0931 |
| 83  | 0     | n.d.   | 9572 | 0.0837 |
| 84  | 0     | n.d.   | 9595 | 0.1058 |
| 85  | 0     | n.d.   | 9499 | 0.0962 |
| 86  | 0     | n.d.   | 9389 | 0.0913 |
| 87  | 0     | n.d.   | 9359 | 0.1012 |
| 88  | 0     | n.d.   | 8425 | 0.1156 |
| 89  | 0     | n.d.   | 8917 | 0.0948 |
| 90  | 0     | n.d.   | 6020 | 0.088  |
| 91  | 0     | n.d.   | 9203 | 0.0816 |
| 92  | 0     | n.d.   | 9506 | 0.0757 |
| 93  | 7146  | 0.0024 | 9146 | 0.0789 |
| 94  | 9828  | 0.003  | 9344 | 0.0972 |
| 95  | 9084  | 0.0036 | 9150 | 0.0845 |
| 96  | 9445  | 0.0047 | 9273 | 0.1084 |
| 97  | 9984  | 0.0052 | 9735 | 0.0989 |
| 98  | 9987  | 0.0034 | 9489 | 0.0938 |
| 99  | 9964  | 0.0042 | 9410 | 0.0818 |
| 100 | 9838  | 0.0042 | 9588 | 0.0859 |

|      |       |        |      |        |
|------|-------|--------|------|--------|
| 101  | 9281  | 0.0038 | 8956 | 0.0819 |
| 102  | 9357  | 0.0025 | 8979 | 0.1144 |
| 103  | 9094  | 0.002  | 8236 | 0.1064 |
| 104  | 3767  | 0.0011 | 3693 | 0.1135 |
| 105* | 7725  | 0.0003 | 7449 | 0.0943 |
| 106* | 7576  | 0      | 7208 | 0.1118 |
| 107* | 10000 | 0.0002 | 9576 | 0.1123 |
| 108* | 7735  | 0.0006 | 2588 | 0.1179 |
| 109* | 9045  | 0.0002 | 0    | n.d.   |
| 110* | 9044  | 0.0003 | 5604 | 0.1724 |
| 111* | 9028  | 0.0006 | 1473 | 0.1321 |
| 112  | 8688  | 0.0012 | 0    | n.d.   |
| 113  | 8092  | 0.0039 | 0    | n.d.   |
| 114* | 9045  | 0.0007 | 0    | n.d.   |
| 115  | 9049  | 0.0012 | 0    | n.d.   |
| 116  | 8095  | 0.0009 | 0    | n.d.   |
| 117* | 8869  | 0.0007 | 0    | n.d.   |
| 118  | 7320  | 0.0047 | 0    | n.d.   |
| 119  | 8595  | 0.0009 | 958  | 0.1148 |
| 120  | 6032  | 0.002  | 4953 | 0.1153 |
| 121  | 0     | n.d.   | 0    | n.d.   |
| 122  | 0     | n.d.   | 0    | n.d.   |
| 123  | 0     | n.d.   | 0    | n.d.   |
| 124  | 0     | n.d.   | 0    | n.d.   |
| 125* | 2755  | 0.0007 | 2682 | 0.1059 |
| 126  | 9868  | 0.0008 | 8944 | 0.0839 |
| 127  | 9203  | 0.0009 | 9784 | 0.0917 |
| 128* | 9264  | 0.0004 | 9509 | 0.1043 |
| 129* | 8717  | 0.0002 | 8999 | 0.1136 |
| 130* | 9934  | 0      | 9768 | 0.1047 |
| 131* | 9481  | 0      | 9345 | 0.1112 |
| 132* | 8848  | 0      | 7530 | 0.097  |
| 133* | 8836  | 0.0001 | 8626 | 0.1139 |
| 134* | 8372  | 0.0004 | 8597 | 0.1088 |
| 135* | 9183  | 0.0005 | 6798 | 0.1038 |
| 136  | 8583  | 0.0034 | 7715 | 0.1169 |
| 137  | 8720  | 0.0025 | 8799 | 0.1075 |
| 138  | 8722  | 0.0018 | 9673 | 0.0986 |
| 139  | 9449  | 0.0035 | 9106 | 0.0945 |
| 140  | 3522  | 0.0034 | 3274 | 0.1053 |
| 141  | 0     | n.d.   | 0    | n.d.   |
| 142  | 0     | n.d.   | 0    | n.d.   |
| 143  | 0     | n.d.   | 0    | n.d.   |
| 144  | 0     | n.d.   | 0    | n.d.   |
| 145  | 1504  | 0.002  | 5568 | 0.104  |
| 146  | 8941  | 0.0043 | 8661 | 0.098  |
| 147  | 7848  | 0.0014 | 7908 | 0.1174 |
| 148* | 8232  | 0.0006 | 7766 | 0.0892 |
| 149  | 10000 | 0.0011 | 9850 | 0.0983 |
| 150* | 9634  | 0.0006 | 9744 | 0.0911 |
| 151* | 9967  | 0.0007 | 8743 | 0.092  |
| 152  | 9999  | 0.0012 | 9368 | 0.1194 |

|      |       |        |      |        |
|------|-------|--------|------|--------|
| 153  | 9756  | 0.0012 | 8569 | 0.1147 |
| 154  | 9963  | 0.0013 | 8282 | 0.1008 |
| 155  | 6204  | 0.0013 | 4865 | 0.1187 |
| 156  | 9920  | 0.001  | 9369 | 0.0983 |
| 157  | 9675  | 0.001  | 9120 | 0.107  |
| 158  | 9904  | 0.0021 | 8807 | 0.0966 |
| 159* | 9666  | 0.0005 | 7935 | 0.1068 |
| 160* | 10000 | 0      | 8750 | 0.1089 |
| 161* | 10000 | 0.0003 | 9545 | 0.1021 |
| 162  | 9015  | 0.0013 | 8908 | 0.0922 |
| 163  | 10000 | 0.0011 | 9711 | 0.0897 |
| 164  | 9998  | 0.0012 | 9763 | 0.0892 |
| 165  | 8179  | 0.001  | 8116 | 0.0602 |
| 166  | 9548  | 0.0019 | 8472 | 0.0784 |
| 167  | 9565  | 0.0017 | 8947 | 0.0559 |
| 168  | 9704  | 0.0013 | 9525 | 0.0676 |
| 169  | 9841  | 0.0022 | 9615 | 0.0704 |
| 170  | 9986  | 0.0022 | 9782 | 0.1006 |
| 171  | 9740  | 0.0021 | 9496 | 0.0791 |
| 172  | 9974  | 0.0025 | 9778 | 0.0855 |
| 173  | 8733  | 0.0015 | 8552 | 0.0996 |
| 174  | 0     | n.d.   | 0    | n.d.   |
| 175  | 0     | n.d.   | 0    | n.d.   |
| 176  | 0     | n.d.   | 0    | n.d.   |
| 177  | 0     | n.d.   | 0    | n.d.   |
| 178* | 826   | 0      | 825  | 0.1108 |
| 179* | 9414  | 0.0005 | 8880 | 0.0885 |
| 180  | 9992  | 0.0016 | 9689 | 0.1025 |
| 181  | 9058  | 0.0028 | 9615 | 0.0857 |
| 182  | 9549  | 0.0017 | 9351 | 0.0806 |
| 183  | 9998  | 0.0019 | 9741 | 0.0788 |
| 184  | 9446  | 0.0018 | 9390 | 0.0897 |
| 185  | 9969  | 0.0013 | 9193 | 0.0908 |
| 186  | 9175  | 0.0024 | 8901 | 0.0932 |
| 187  | 9963  | 0.0015 | 9560 | 0.1023 |
| 188  | 9868  | 0.0016 | 9197 | 0.1053 |
| 189  | 9995  | 0.0012 | 9706 | 0.0924 |
| 190* | 10000 | 0.0005 | 9423 | 0.0749 |
| 191* | 9919  | 0.0003 | 9583 | 0.102  |
| 192  | 9988  | 0.0012 | 9788 | 0.0873 |
| 193  | 4712  | 0.0017 | 4610 | 0.088  |
| 194  | 0     | n.d.   | 0    | n.d.   |
| 195  | 0     | n.d.   | 0    | n.d.   |
| 196  | 0     | n.d.   | 0    | n.d.   |
| 197  | 0     | n.d.   | 0    | n.d.   |
| 198  | 4439  | 0.0039 | 4426 | 0.1146 |
| 199  | 9769  | 0.003  | 8778 | 0.1111 |
| 200  | 9544  | 0.0027 | 9014 | 0.1104 |
| 201  | 9807  | 0.0017 | 9548 | 0.1121 |
| 202  | 9684  | 0.0038 | 9299 | 0.1112 |
| 203  | 9438  | 0.003  | 8604 | 0.1099 |
| 204  | 9074  | 0.0023 | 8844 | 0.1052 |

|       |      |        |      |        |
|-------|------|--------|------|--------|
| 205   | 9448 | 0.0029 | 8648 | 0.1031 |
| 206   | 9026 | 0.0008 | 7686 | 0.1007 |
| 207   | 9847 | 0.0008 | 8789 | 0.0974 |
| 208   | 9594 | 0.0008 | 8457 | 0.0936 |
| 209   | 9347 | 0.0024 | 7566 | 0.1043 |
| 210   | 9670 | 0.0015 | 8662 | 0.0988 |
| 211   | 9472 | 0.0028 | 8458 | 0.1266 |
| 212   | 8841 | 0.0027 | 8905 | 0.1142 |
| 213   | 9617 | 0.0042 | 8480 | 0.1096 |
| 214   | 9998 | 0.0035 | 8120 | 0.1046 |
| 215   | 9561 | 0.0022 | 8971 | 0.0686 |
| 216   | 9795 | 0.0019 | 9565 | 0.0905 |
| 217   | 9182 | 0.0023 | 8543 | 0.1115 |
| 218   | 9856 | 0.0026 | 9316 | 0.095  |
| 219   | 9610 | 0.0029 | 9152 | 0.1079 |
| 220   | 9927 | 0.0023 | 9474 | 0.1229 |
| 221   | 9983 | 0.0028 | 9090 | 0.1102 |
| 222   | 9703 | 0.002  | 8853 | 0.1181 |
| 223   | 9801 | 0.0045 | 7412 | 0.0757 |
| 224   | 9584 | 0.0017 | 7522 | 0.1026 |
| 225   | 4130 | 0.001  | 9688 | 0.1048 |
| 226   | 0    | n.d.   | 1226 | 0.1159 |
| 227   | 0    | n.d.   | 0    | n.d.   |
| 228   | 0    | n.d.   | 0    | n.d.   |
| 229   | 0    | n.d.   | 0    | n.d.   |
| 230   | 0    | n.d.   | 0    | n.d.   |
| 231   | 0    | n.d.   | 7910 | 0.1021 |
| 232   | 0    | n.d.   | 9147 | 0.1166 |
| 233   | 0    | n.d.   | 8286 | 0.1206 |
| 234   | 0    | n.d.   | 8650 | 0.1196 |
| 235   | 0    | n.d.   | 8305 | 0.1085 |
| 236   | 0    | n.d.   | 8926 | 0.1042 |
| 237   | 0    | n.d.   | 7489 | 0.1099 |
| 238   | 0    | n.d.   | 7495 | 0.1202 |
| 239   | 0    | n.d.   | 8199 | 0.1108 |
| 240   | 0    | n.d.   | 9750 | 0.1018 |
| 241   | 0    | n.d.   | 9044 | 0.0925 |
| 242   | 0    | n.d.   | 8112 | 0.0981 |
| 243   | 0    | n.d.   | 9218 | 0.1192 |
| 244   | 0    | n.d.   | 9370 | 0.1165 |
| 245   | 2314 | 0.0084 | 9498 | 0.1099 |
| 246   | 9966 | 0.0073 | 9425 | 0.1128 |
| 247   | 9910 | 0.0077 | 9701 | 0.0888 |
| 248** | 8306 | 0.0261 | 6110 | 0.0975 |
| 249   | 4583 | 0.0533 | 0    | n.d.   |
| 250   | 9650 | 0.0154 | 6769 | 0.1658 |
| 251   | 9991 | 0.0081 | 9700 | 0.1048 |
| 252   | 4366 | 0.0072 | 9605 | 0.1062 |
| 253   | 9993 | 0.0079 | 9645 | 0.1124 |
| 254   | 9718 | 0.0094 | 9524 | 0.113  |
| 255   | 9989 | 0.0119 | 9392 | 0.1067 |
| 256   | 9001 | 0.0123 | 8446 | 0.1221 |

|        |      |        |      |        |
|--------|------|--------|------|--------|
| 257    | 9954 | 0.013  | 8582 | 0.1198 |
| 258    | 9984 | 0.0078 | 9027 | 0.0932 |
| 259    | 9968 | 0.0079 | 9599 | 0.0966 |
| 260    | 9970 | 0.0132 | 9375 | 0.1231 |
| 261    | 9981 | 0.0108 | 9700 | 0.1084 |
| 262    | 9923 | 0.0134 | 9157 | 0.1149 |
| 263    | 9980 | 0.0108 | 9524 | 0.1371 |
| 264    | 8379 | 0.0124 | 9178 | 0.1179 |
| 265    | 9896 | 0.0104 | 9239 | 0.1372 |
| 266    | 9982 | 0.0137 | 9070 | 0.1333 |
| 267    | 9820 | 0.0146 | 8567 | 0.1301 |
| 268    | 9988 | 0.0177 | 8337 | 0.152  |
| 269    | 9969 | 0.0164 | 9327 | 0.1467 |
| 270    | 9806 | 0.0154 | 9505 | 0.1454 |
| 271    | 9577 | 0.0153 | 9127 | 0.1463 |
| 272    | 6467 | 0.0144 | 8702 | 0.1172 |
| 273    | 9983 | 0.0108 | 8863 | 0.0928 |
| 274    | 8225 | 0.0094 | 9213 | 0.089  |
| 275    | 9996 | 0.0121 | 9348 | 0.0979 |
| 276    | 9463 | 0.0121 | 9608 | 0.0897 |
| 277    | 9981 | 0.0071 | 9809 | 0.0794 |
| 278    | 9815 | 0.0113 | 9746 | 0.1012 |
| 279    | 9962 | 0.009  | 9884 | 0.0898 |
| 280    | 9672 | 0.0105 | 9120 | 0.0779 |
| 281    | 6625 | 0.0085 | 8897 | 0.0742 |
| 282    | 0    | n.d.   | 9359 | 0.0741 |
| 283    | 0    | n.d.   | 7486 | 0.0813 |
| 284    | 0    | n.d.   | 5998 | 0.1073 |
| 285    | 0    | n.d.   | 9842 | 0.1007 |
| 286    | 0    | n.d.   | 9668 | 0.1074 |
| 287    | 0    | n.d.   | 9293 | 0.107  |
| 288    | 0    | n.d.   | 8766 | 0.1155 |
| 289    | 0    | n.d.   | 9712 | 0.1183 |
| 290    | 0    | n.d.   | 9873 | 0.1021 |
| 291    | 0    | n.d.   | 1577 | 0.1199 |
| 292    | 0    | n.d.   | 0    | n.d.   |
| 293    | 0    | n.d.   | 0    | n.d.   |
| 294    | 0    | n.d.   | 0    | n.d.   |
| 295    | 0    | n.d.   | 0    | n.d.   |
| 296    | 8296 | 0.0146 | 8109 | 0.0888 |
| 297    | 9950 | 0.0149 | 8615 | 0.0994 |
| 298*** | 9660 | 0.0242 | 8331 | 0.1177 |
| 299    | 9917 | 0.0202 | 9703 | 0.1264 |
| 300    | 9893 | 0.0154 | 8733 | 0.125  |
| 301    | 9991 | 0.0178 | 9770 | 0.1068 |
| 302    | 9964 | 0.0142 | 9616 | 0.1102 |
| 303    | 9975 | 0.0136 | 8662 | 0.1082 |
| 304    | 9516 | 0.0193 | 8594 | 0.114  |
| 305    | 9985 | 0.015  | 9410 | 0.1163 |
| 306    | 9462 | 0.0167 | 8670 | 0.1215 |
| 307    | 9915 | 0.019  | 9297 | 0.1335 |
| 308    | 9967 | 0.0175 | 8764 | 0.1116 |

|        |      |        |      |        |
|--------|------|--------|------|--------|
| 309    | 9898 | 0.0172 | 8630 | 0.0923 |
| 310    | 9595 | 0.0191 | 9285 | 0.1059 |
| 311    | 9454 | 0.0199 | 8045 | 0.1109 |
| 312    | 7744 | 0.0194 | 8203 | 0.107  |
| 313    | 9942 | 0.0159 | 8934 | 0.1066 |
| 314    | 9929 | 0.0168 | 9221 | 0.1169 |
| 315    | 9757 | 0.0159 | 9039 | 0.1126 |
| 316    | 8403 | 0.0186 | 7542 | 0.1153 |
| 317    | 9996 | 0.0165 | 9609 | 0.1147 |
| 318    | 9883 | 0.0147 | 9723 | 0.1034 |
| 319    | 9758 | 0.0144 | 9222 | 0.0934 |
| 320    | 9600 | 0.0142 | 9688 | 0.1008 |
| 321    | 9949 | 0.0201 | 7881 | 0.1156 |
| 322    | 9881 | 0.0189 | 8656 | 0.0942 |
| 323    | 9878 | 0.0171 | 8619 | 0.1145 |
| 324    | 9867 | 0.0128 | 9758 | 0.0959 |
| 325    | 9878 | 0.0164 | 8916 | 0.1019 |
| 326    | 9671 | 0.011  | 9136 | 0.095  |
| 327    | 9983 | 0.0115 | 9668 | 0.0894 |
| 328    | 8908 | 0.0143 | 9424 | 0.0807 |
| 329    | 9195 | 0.0146 | 8555 | 0.0961 |
| 330    | 8611 | 0.0164 | 7827 | 0.0855 |
| 331*** | 9776 | 0.0231 | 7491 | 0.1375 |
| 332    | 8207 | 0.0221 | 7327 | 0.1213 |
| 333    | 8028 | 0.0181 | 6557 | 0.1201 |
| 334    | 0    | n.d.   | 7651 | 0.1169 |
| 335    | 4519 | 0.0167 | 3457 | 0.119  |
| 336    | 8227 | 0.0198 | 7155 | 0.1299 |
| 337    | 9963 | 0.0199 | 8806 | 0.1092 |
| 338    | 9790 | 0.0164 | 9360 | 0.1088 |
| 339    | 9872 | 0.0176 | 8500 | 0.1185 |
| 340    | 9685 | 0.0208 | 8040 | 0.1152 |
| 341    | 9121 | 0.0224 | 4971 | 0.1062 |
| 342    | 8122 | 0.0188 | 6540 | 0.1237 |
| 343    | 8685 | 0.0203 | 6345 | 0.1292 |
| 344    | 8696 | 0.0114 | 8219 | 0.0945 |
| 345    | 8995 | 0.0127 | 8771 | 0.1016 |
| 346    | 8367 | 0.0162 | 7704 | 0.1289 |
| 347*** | 8256 | 0.0241 | 7278 | 0.1462 |
| 348    | 9690 | 0.0221 | 7682 | 0.1205 |
| 349    | 9332 | 0.0124 | 8313 | 0.1293 |
| 350    | 9939 | 0.015  | 6686 | 0.1088 |
| 351    | 9878 | 0.0182 | 9088 | 0.1072 |
| 352    | 9812 | 0.0205 | 6947 | 0.1068 |
| 353    | 7272 | 0.0175 | 7092 | 0.1131 |
| 354    | 9885 | 0.014  | 7780 | 0.1151 |
| 355    | 4212 | 0.0162 | 3935 | 0.1264 |
| 356    | 0    | n.d.   | 0    | n.d.   |
| 357    | 0    | n.d.   | 0    | n.d.   |
| 358    | 0    | n.d.   | 0    | n.d.   |
| 359    | 0    | n.d.   | 0    | n.d.   |
| 360    | 5124 | 0.0151 | 4512 | 0.114  |

|        |      |        |      |        |
|--------|------|--------|------|--------|
| 361    | 7656 | 0.0144 | 7083 | 0.0897 |
| 362    | 8874 | 0.0196 | 8409 | 0.0943 |
| 363    | 8743 | 0.0177 | 9352 | 0.0952 |
| 364    | 9664 | 0.013  | 9602 | 0.0906 |
| 365    | 9719 | 0.0187 | 8782 | 0.1036 |
| 366    | 9929 | 0.0177 | 9727 | 0.1062 |
| 367    | 7632 | 0.018  | 8558 | 0.0943 |
| 368    | 9655 | 0.0165 | 8976 | 0.1023 |
| 369    | 9688 | 0.0186 | 9688 | 0.1043 |
| 370    | 7983 | 0.0138 | 7978 | 0.0963 |
| 371    | 7525 | 0.0077 | 8742 | 0.1072 |
| 372    | 9860 | 0.0166 | 8986 | 0.1028 |
| 373    | 9982 | 0.0163 | 9723 | 0.1074 |
| 374    | 9987 | 0.0165 | 9153 | 0.095  |
| 375    | 9913 | 0.0158 | 8466 | 0.0951 |
| 376    | 9538 | 0.0134 | 7810 | 0.0914 |
| 377    | 9830 | 0.0134 | 9693 | 0.0913 |
| 378    | 9930 | 0.019  | 9367 | 0.1054 |
| 379    | 9816 | 0.0191 | 8531 | 0.1066 |
| 380    | 9806 | 0.0114 | 9205 | 0.109  |
| 381    | 9353 | 0.0142 | 8866 | 0.0986 |
| 382    | 8231 | 0.0103 | 7491 | 0.0999 |
| 383    | 7846 | 0.0161 | 6140 | 0.1045 |
| 384    | 9733 | 0.0152 | 8807 | 0.0894 |
| 385    | 8159 | 0.0125 | 8198 | 0.0923 |
| 386    | 5093 | 0.0177 | 8380 | 0.0994 |
| 387    | 0    | n.d.   | 8698 | 0.1136 |
| 388    | 0    | n.d.   | 8241 | 0.1094 |
| 389    | 0    | n.d.   | 410  | 0.1031 |
| 390    | 0    | n.d.   | 0    | n.d.   |
| 391    | 0    | n.d.   | 0    | n.d.   |
| 392    | 0    | n.d.   | 0    | n.d.   |
| 393    | 0    | n.d.   | 0    | n.d.   |
| 394    | 8403 | 0.0114 | 8195 | 0.1173 |
| 395    | 7778 | 0.0208 | 8253 | 0.1105 |
| 396    | 8999 | 0.0123 | 8631 | 0.1061 |
| 397    | 9630 | 0.0121 | 9006 | 0.1062 |
| 398    | 9978 | 0.013  | 9142 | 0.1128 |
| 399    | 8882 | 0.0124 | 8550 | 0.1134 |
| 400    | 9166 | 0.0124 | 8355 | 0.1108 |
| 401    | 7555 | 0.0143 | 6440 | 0.1206 |
| 402    | 8138 | 0.0207 | 6893 | 0.1397 |
| 403    | 9015 | 0.0171 | 3671 | 0.1188 |
| 404    | 9929 | 0.0129 | 0    | n.d.   |
| 405    | 8234 | 0.0193 | 0    | n.d.   |
| 406    | 8923 | 0.0217 | 262  | 0.1792 |
| 407    | 9409 | 0.0167 | 7732 | 0.13   |
| 408*** | 4964 | 0.0239 | 4781 | 0.1246 |
| 409    | 0    | n.d.   | 0    | n.d.   |
| 410    | 0    | n.d.   | 0    | n.d.   |
| 411    | 0    | n.d.   | 0    | n.d.   |
| 412    | 0    | n.d.   | 0    | n.d.   |



|        |      |        |      |        |
|--------|------|--------|------|--------|
| 413    | 0    | n.d.   | 4479 | 0.094  |
| 414    | 0    | n.d.   | 9299 | 0.1101 |
| 415    | 0    | n.d.   | 9856 | 0.0886 |
| 416    | 0    | n.d.   | 8792 | 0.1056 |
| 417    | 0    | n.d.   | 9685 | 0.1113 |
| 418    | 0    | n.d.   | 9747 | 0.1138 |
| 419    | 0    | n.d.   | 9602 | 0.1022 |
| 420    | 0    | n.d.   | 8125 | 0.0971 |
| 421    | 5913 | 0.0167 | 8869 | 0.0999 |
| 422    | 4707 | 0.017  | 3863 | 0.109  |
| 423    | 9970 | 0.0139 | 9425 | 0.0941 |
| 424    | 9958 | 0.014  | 9097 | 0.1219 |
| 425*** | 9749 | 0.0241 | 9110 | 0.1145 |
| 426    | 9332 | 0.0208 | 8323 | 0.1155 |
| 427*** | 9131 | 0.0238 | 8178 | 0.1133 |
| 428    | 9941 | 0.0216 | 9639 | 0.1159 |
| 429    | 9954 | 0.019  | 9316 | 0.124  |
| 430    | 9933 | 0.0187 | 9734 | 0.1345 |
| 431    | 9568 | 0.0211 | 8970 | 0.1171 |
| 432    | 9641 | 0.0194 | 8905 | 0.1156 |
| 433    | 9891 | 0.0193 | 9257 | 0.1336 |
| 434    | 9377 | 0.0143 | 8671 | 0.1131 |
| 435    | 9150 | 0.0163 | 8412 | 0.1049 |
| 436    | 9597 | 0.0181 | 8673 | 0.1252 |
| 437    | 8507 | 0.0147 | 8052 | 0.1108 |
| 438*** | 9409 | 0.0253 | 7695 | 0.1308 |
| 439    | 8938 | 0.0171 | 9561 | 0.1107 |
| 440    | 9470 | 0.0187 | 9145 | 0.1117 |
| 441    | 9559 | 0.0158 | 9219 | 0.1121 |
| 442    | 7736 | 0.0136 | 7621 | 0.1051 |
| 443    | 0    | n.d.   | 0    | n.d.   |
| 444    | 0    | n.d.   | 0    | n.d.   |
| 445    | 0    | n.d.   | 0    | n.d.   |
| 446    | 0    | n.d.   | 0    | n.d.   |
| 447    | 2246 | 0.0086 | 2213 | 0.1041 |
| 448    | 9928 | 0.0199 | 9472 | 0.1182 |
| 449    | 9905 | 0.0214 | 9311 | 0.1376 |
| 450    | 9297 | 0.0196 | 8463 | 0.1328 |
| 451    | 9694 | 0.015  | 8624 | 0.117  |
| 452    | 9475 | 0.0175 | 9106 | 0.1116 |
| 453    | 9584 | 0.0149 | 8304 | 0.1123 |
| 454    | 9363 | 0.0113 | 9212 | 0.0891 |
| 455    | 9534 | 0.0145 | 9140 | 0.1181 |
| 456    | 9839 | 0.017  | 9265 | 0.1355 |
| 457    | 9726 | 0.0162 | 9404 | 0.1215 |
| 458    | 9962 | 0.0176 | 9479 | 0.1128 |
| 459    | 9954 | 0.0156 | 9721 | 0.12   |
| 460    | 9270 | 0.0149 | 8959 | 0.1136 |
| 461    | 9041 | 0.016  | 8205 | 0.1226 |
| 462    | 9967 | 0.0178 | 9416 | 0.1301 |
| 463    | 338  | 0.003  | 9183 | 0.119  |
| 464    | 0    | n.d.   | 8808 | 0.1313 |

|     |      |        |      |        |
|-----|------|--------|------|--------|
| 465 | 0    | n.d.   | 7248 | 0.1286 |
| 466 | 0    | n.d.   | 8168 | 0.1223 |
| 467 | 0    | n.d.   | 9016 | 0.1213 |
| 468 | 0    | n.d.   | 7941 | 0.1332 |
| 469 | 0    | n.d.   | 7899 | 0.1267 |
| 470 | 0    | n.d.   | 8644 | 0.1111 |
| 471 | 0    | n.d.   | 7978 | 0.131  |
| 472 | 0    | n.d.   | 7706 | 0.1175 |
| 473 | 0    | n.d.   | 7921 | 0.115  |
| 474 | 0    | n.d.   | 8204 | 0.138  |
| 475 | 0    | n.d.   | 8236 | 0.1236 |
| 476 | 0    | n.d.   | 5548 | 0.1292 |
| 477 | 0    | n.d.   | 8724 | 0.1198 |
| 478 | 0    | n.d.   | 8971 | 0.1091 |
| 479 | 0    | n.d.   | 9056 | 0.1128 |
| 480 | 3800 | 0.0133 | 7944 | 0.1195 |
| 481 | 8565 | 0.0182 | 8168 | 0.1289 |
| 482 | 8795 | 0.0173 | 7954 | 0.1298 |
| 483 | 9010 | 0.016  | 8666 | 0.1151 |
| 484 | 8945 | 0.0104 | 8877 | 0.1033 |
| 485 | 9140 | 0.0138 | 8816 | 0.1268 |
| 486 | 8506 | 0.0126 | 8388 | 0.1031 |
| 487 | 8819 | 0.0086 | 8654 | 0.091  |
| 488 | 9967 | 0.0086 | 9592 | 0.1067 |
| 489 | 8643 | 0.0157 | 7906 | 0.119  |
| 490 | 9229 | 0.0144 | 9065 | 0.1361 |
| 491 | 9447 | 0.0151 | 8982 | 0.1174 |
| 492 | 9936 | 0.0145 | 9722 | 0.1188 |
| 493 | 7017 | 0.0106 | 8917 | 0.1237 |
| 494 | 9367 | 0.0114 | 8752 | 0.1249 |
| 495 | 9829 | 0.0122 | 9484 | 0.1044 |
| 496 | 9362 | 0.0148 | 8781 | 0.1118 |
| 497 | 9453 | 0.0168 | 8830 | 0.1206 |
| 498 | 9363 | 0.0124 | 9066 | 0.1116 |
| 499 | 8758 | 0.0135 | 8233 | 0.099  |
| 500 | 9427 | 0.0166 | 9142 | 0.1117 |
| 501 | 8493 | 0.0179 | 7993 | 0.1312 |
| 502 | 6909 | 0.0173 | 6666 | 0.1279 |
| 503 | 0    | n.d.   | 0    | n.d.   |
| 504 | 0    | n.d.   | 0    | n.d.   |
| 505 | 0    | n.d.   | 0    | n.d.   |
| 506 | 0    | n.d.   | 0    | n.d.   |
| 507 | 0    | n.d.   | 2146 | 0.1125 |
| 508 | 0    | n.d.   | 8365 | 0.1011 |
| 509 | 0    | n.d.   | 7565 | 0.123  |
| 510 | 0    | n.d.   | 8964 | 0.124  |
| 511 | 0    | n.d.   | 8861 | 0.1113 |
| 512 | 0    | n.d.   | 5786 | 0.1346 |
| 513 | 0    | n.d.   | 7787 | 0.1036 |
| 514 | 0    | n.d.   | 7340 | 0.1093 |
| 515 | 0    | n.d.   | 9671 | 0.1066 |
| 516 | 0    | n.d.   | 9244 | 0.1102 |

|     |      |        |      |        |
|-----|------|--------|------|--------|
| 517 | 3687 | 0.0111 | 9022 | 0.1045 |
| 518 | 9744 | 0.0133 | 9467 | 0.1036 |
| 519 | 9663 | 0.0115 | 9491 | 0.1146 |
| 520 | 8741 | 0.0131 | 8554 | 0.1004 |
| 521 | 9988 | 0.012  | 9347 | 0.1098 |
| 522 | 9715 | 0.0112 | 9436 | 0.1173 |
| 523 | 3225 | 0.0141 | 2873 | 0.0948 |
| 524 | 0    | n.d.   | 0    | n.d.   |
| 525 | 0    | n.d.   | 0    | n.d.   |
| 526 | 0    | n.d.   | 0    | n.d.   |
| 527 | 0    | n.d.   | 0    | n.d.   |
| 528 | 6732 | 0.0102 | 6172 | 0.088  |
| 529 | 9956 | 0.0135 | 9261 | 0.1105 |
| 530 | 9572 | 0.0119 | 9402 | 0.1029 |
| 531 | 9956 | 0.0166 | 9309 | 0.1068 |
| 532 | 9724 | 0.0131 | 8945 | 0.0986 |
| 533 | 9968 | 0.013  | 9599 | 0.0853 |
| 534 | 9542 | 0.0136 | 9255 | 0.1094 |
| 535 | 7706 | 0.0129 | 9338 | 0.1058 |
| 536 | 9610 | 0.0126 | 7615 | 0.105  |
| 537 | 9712 | 0.0093 | 9368 | 0.1028 |
| 538 | 9097 | 0.0141 | 8198 | 0.1095 |
| 539 | 8185 | 0.0142 | 7767 | 0.0909 |
| 540 | 9041 | 0.0119 | 6866 | 0.0867 |
| 541 | 9928 | 0.0163 | 7724 | 0.1107 |
| 542 | 9987 | 0.016  | 9730 | 0.0788 |
| 543 | 2930 | 0.013  | 2848 | 0.1142 |
| 544 | 0    | n.d.   | 0    | n.d.   |
| 545 | 0    | n.d.   | 0    | n.d.   |
| 546 | 0    | n.d.   | 0    | n.d.   |
| 547 | 0    | n.d.   | 0    | n.d.   |
| 548 | 6697 | 0.0094 | 6062 | 0.0661 |
| 549 | 9530 | 0.0175 | 9286 | 0.1106 |
| 550 | 7525 | 0.015  | 6514 | 0.1143 |
| 551 | 9929 | 0.0153 | 9002 | 0.1159 |
| 552 | 7712 | 0.0127 | 8546 | 0.1095 |
| 553 | 9956 | 0.0146 | 9099 | 0.1163 |
| 554 | 9824 | 0.0124 | 9327 | 0.1084 |
| 555 | 9702 | 0.0172 | 7303 | 0.1287 |
| 556 | 9295 | 0.0143 | 8545 | 0.1068 |
| 557 | 9439 | 0.0113 | 9037 | 0.1136 |
| 558 | 7908 | 0.0108 | 7525 | 0.0942 |
| 559 | 8935 | 0.0127 | 8005 | 0.1185 |
| 560 | 9691 | 0.0147 | 8751 | 0.1149 |
| 561 | 9957 | 0.013  | 9775 | 0.1073 |
| 562 | 9727 | 0.0089 | 9068 | 0.1003 |
| 563 | 9637 | 0.0061 | 6696 | 0.0941 |
| 564 | 9163 | 0.0128 | 7855 | 0.0878 |
| 565 | 9440 | 0.0123 | 8818 | 0.0937 |
| 566 | 9421 | 0.012  | 8926 | 0.0919 |
| 567 | 9992 | 0.0119 | 9856 | 0.0842 |
| 568 | 9991 | 0.014  | 9530 | 0.0985 |

|         |      |        |      |        |
|---------|------|--------|------|--------|
| 569     | 9726 | 0.012  | 9274 | 0.0787 |
| 570     | 9966 | 0.0105 | 9613 | 0.0746 |
| 571***  | 355  | 0.0268 | 7853 | 0.0859 |
| 572     | 0    | n.d.   | 9543 | 0.0839 |
| 573     | 1522 | 0.0094 | 8902 | 0.072  |
| 574     | 9977 | 0.0141 | 9468 | 0.1051 |
| 575     | 9902 | 0.008  | 9785 | 0.0668 |
| 576     | 9753 | 0.0072 | 9512 | 0.087  |
| 577     | 9858 | 0.009  | 9916 | 0.0744 |
| 578     | 8036 | 0.0128 | 9738 | 0.0778 |
| 579     | 8736 | 0.0094 | 8483 | 0.0771 |
| 580     | 9528 | 0.0125 | 9417 | 0.0905 |
| 581     | 9134 | 0.011  | 9299 | 0.0718 |
| 582     | 9974 | 0.0101 | 9695 | 0.0771 |
| 583     | 9759 | 0.0135 | 9466 | 0.0965 |
| 584     | 9532 | 0.0119 | 9519 | 0.0873 |
| 585     | 9681 | 0.0108 | 9726 | 0.0812 |
| 586     | 9911 | 0.0101 | 9701 | 0.1026 |
| 587     | 9961 | 0.0159 | 8411 | 0.0978 |
| 588     | 9854 | 0.0166 | 9618 | 0.0897 |
| 589     | 9965 | 0.0134 | 9742 | 0.0972 |
| 590     | 9363 | 0.012  | 8846 | 0.087  |
| 591     | 9798 | 0.0132 | 8860 | 0.0843 |
| 592     | 9710 | 0.0157 | 9233 | 0.0936 |
| 593     | 9813 | 0.0153 | 9477 | 0.1079 |
| 594     | 9810 | 0.0115 | 9673 | 0.087  |
| 595     | 9482 | 0.0071 | 8597 | 0.085  |
| 596     | 9728 | 0.013  | 9273 | 0.1061 |
| 597     | 7733 | 0.0154 | 7337 | 0.0891 |
| 598     | 7293 | 0.0204 | 2781 | 0.1224 |
| 599     | 8479 | 0.0132 | 1494 | 0.1327 |
| 600     | 7625 | 0.0094 | 7771 | 0.1201 |
| 601**** | 7715 | 0.0039 | 7438 | 0.107  |
| 602**** | 8110 | 0.0031 | 7399 | 0.1143 |
| 603     | 9086 | 0.0104 | 8545 | 0.1004 |
| 604     | 9607 | 0.0123 | 9188 | 0.1038 |
| 605     | 1631 | 0.0068 | 1630 | 0.1113 |
| 606     | 0    | n.d.   | 0    | n.d.   |
| 607     | 0    | n.d.   | 0    | n.d.   |
| 608     | 0    | n.d.   | 0    | n.d.   |
| 609     | 0    | n.d.   | 0    | n.d.   |
| 610     | 7020 | 0.0158 | 6866 | 0.0909 |
| 611     | 9150 | 0.0165 | 8706 | 0.1082 |
| 612     | 9692 | 0.0139 | 8995 | 0.0937 |
| 613     | 8064 | 0.0134 | 7835 | 0.1011 |
| 614     | 9656 | 0.0104 | 8993 | 0.0986 |
| 615     | 9808 | 0.0085 | 9577 | 0.0951 |
| 616     | 8820 | 0.0112 | 8006 | 0.0971 |
| 617     | 9476 | 0.0128 | 8666 | 0.097  |
| 618     | 9280 | 0.0123 | 9150 | 0.0924 |
| 619     | 9549 | 0.0141 | 9137 | 0.0929 |
| 620     | 9850 | 0.0121 | 8645 | 0.0976 |

|     |      |        |      |        |
|-----|------|--------|------|--------|
| 621 | 9960 | 0.0096 | 9819 | 0.0959 |
| 622 | 9857 | 0.0175 | 8529 | 0.1043 |
| 623 | 9976 | 0.016  | 9745 | 0.1031 |
| 624 | 9578 | 0.0155 | 8901 | 0.113  |
| 625 | 9961 | 0.0145 | 9591 | 0.1143 |
| 626 | 8452 | 0.0193 | 8312 | 0.1047 |
| 627 | 8841 | 0.0147 | 8714 | 0.112  |
| 628 | 8641 | 0.0118 | 8500 | 0.1092 |
| 629 | 8195 | 0.0151 | 7889 | 0.103  |
| 630 | 9603 | 0.0155 | 9275 | 0.107  |
| 631 | 6261 | 0.0145 | 7248 | 0.104  |
| 632 | 9704 | 0.0184 | 8865 | 0.1071 |
| 633 | 9761 | 0.0163 | 7247 | 0.1243 |
| 634 | 8702 | 0.0141 | 7723 | 0.1238 |
| 635 | 9701 | 0.0166 | 7459 | 0.1187 |
| 636 | 9167 | 0.0167 | 8839 | 0.1093 |
| 637 | 9996 | 0.0175 | 9720 | 0.1004 |
| 638 | 9719 | 0.0146 | 8069 | 0.1052 |
| 639 | 0    | n.d.   | 0    | n.d.   |
| 640 | 0    | n.d.   | 0    | n.d.   |
| 641 | 0    | n.d.   | 0    | n.d.   |
| 642 | 0    | n.d.   | 0    | n.d.   |
| 643 | 148  | 0      | 144  | 0.0825 |
| 644 | 8338 | 0.0165 | 8031 | 0.1187 |
| 645 | 9962 | 0.0165 | 9321 | 0.1084 |
| 646 | 8941 | 0.0119 | 8191 | 0.105  |
| 647 | 9794 | 0.0122 | 9026 | 0.1039 |
| 648 | 9323 | 0.0134 | 8439 | 0.1034 |
| 649 | 8867 | 0.0173 | 8742 | 0.1116 |
| 650 | 8943 | 0.0127 | 8171 | 0.0928 |
| 651 | 8513 | 0.0158 | 8151 | 0.0988 |
| 652 | 9337 | 0.0134 | 9122 | 0.0945 |
| 653 | 7677 | 0.0126 | 7486 | 0.1031 |
| 654 | 9702 | 0.0214 | 7802 | 0.1191 |
| 655 | 8787 | 0.0208 | 7267 | 0.1257 |
| 656 | 7931 | 0.0166 | 7689 | 0.1    |
| 657 | 9384 | 0.0131 | 9142 | 0.0896 |
| 658 | 9993 | 0.0132 | 9886 | 0.082  |
| 659 | 9956 | 0.0144 | 9406 | 0.0989 |
| 660 | 9060 | 0.0126 | 9416 | 0.0999 |
| 661 | 9177 | 0.015  | 9012 | 0.0995 |
| 662 | 8077 | 0.0117 | 7295 | 0.0905 |
| 663 | 9054 | 0.0124 | 8767 | 0.0924 |
| 664 | 9733 | 0.0115 | 9677 | 0.0926 |
| 665 | 9845 | 0.0161 | 9123 | 0.0929 |
| 666 | 9074 | 0.0164 | 8568 | 0.1138 |
| 667 | 7080 | 0.013  | 8744 | 0.0923 |
| 668 | 8873 | 0.0143 | 8471 | 0.1    |
| 669 | 9491 | 0.0146 | 9233 | 0.118  |
| 670 | 9560 | 0.0149 | 8946 | 0.1002 |
| 671 | 8379 | 0.0103 | 8252 | 0.1037 |
| 672 | 0    | n.d.   | 0    | n.d.   |

|     |      |        |      |        |
|-----|------|--------|------|--------|
| 673 | 0    | n.d.   | 0    | n.d.   |
| 674 | 0    | n.d.   | 0    | n.d.   |
| 675 | 0    | n.d.   | 0    | n.d.   |
| 676 | 1174 | 0.0105 | 1109 | 0.102  |
| 677 | 9940 | 0.0155 | 9770 | 0.1005 |
| 678 | 9903 | 0.0126 | 9592 | 0.101  |
| 679 | 7433 | 0.0192 | 6063 | 0.1027 |
| 680 | 9966 | 0.0184 | 9314 | 0.1045 |
| 681 | 9954 | 0.0129 | 9221 | 0.0986 |
| 682 | 9980 | 0.022  | 9692 | 0.1084 |
| 683 | 9890 | 0.0153 | 9417 | 0.1038 |
| 684 | 9990 | 0.0125 | 9434 | 0.1008 |
| 685 | 9982 | 0.0209 | 8818 | 0.1233 |
| 686 | 9753 | 0.0124 | 6312 | 0.1049 |
| 687 | 9483 | 0.0183 | 8607 | 0.1198 |
| 688 | 7726 | 0.0122 | 7569 | 0.116  |
| 689 | 8717 | 0.0163 | 8443 | 0.1072 |
| 690 | 8521 | 0.0182 | 7896 | 0.0939 |
| 691 | 2131 | 0.0221 | 2134 | 0.1036 |
| 692 | 0    | n.d.   | 0    | n.d.   |
| 693 | 0    | n.d.   | 0    | n.d.   |
| 694 | 0    | n.d.   | 0    | n.d.   |
| 695 | 0    | n.d.   | 0    | n.d.   |
| 696 | 4781 | 0.0109 | 4272 | 0.1058 |
| 697 | 8811 | 0.0113 | 6941 | 0.0997 |
| 698 | 9217 | 0.0125 | 9117 | 0.1004 |
| 699 | 9394 | 0.0115 | 9064 | 0.1045 |
| 700 | 9982 | 0.0155 | 9711 | 0.0959 |
| 701 | 9882 | 0.0131 | 9447 | 0.1085 |
| 702 | 9950 | 0.015  | 8805 | 0.1119 |
| 703 | 9861 | 0.0078 | 9294 | 0.1018 |
| 704 | 8228 | 0.0155 | 7864 | 0.1209 |
| 705 | 5932 | 0.019  | 5314 | 0.1215 |
| 706 | 9445 | 0.0122 | 8960 | 0.0962 |
| 707 | 9459 | 0.0119 | 9209 | 0.0986 |
| 708 | 9980 | 0.0121 | 9676 | 0.0956 |
| 709 | 9431 | 0.01   | 8590 | 0.0875 |
| 710 | 9980 | 0.0124 | 9257 | 0.0895 |
| 711 | 460  | 0.0044 | 455  | 0.0953 |
| 712 | 0    | n.d.   | 0    | n.d.   |
| 713 | 0    | n.d.   | 0    | n.d.   |
| 714 | 0    | n.d.   | 0    | n.d.   |
| 715 | 0    | n.d.   | 0    | n.d.   |
| 716 | 9257 | 0.0099 | 8995 | 0.0923 |
| 717 | 9950 | 0.011  | 9248 | 0.1019 |
| 718 | 9990 | 0.0061 | 9469 | 0.1009 |
| 719 | 9989 | 0.0117 | 9818 | 0.1081 |
| 720 | 9950 | 0.0141 | 9560 | 0.1097 |
| 721 | 9057 | 0.0168 | 9197 | 0.0988 |
| 722 | 9337 | 0.0147 | 9004 | 0.1056 |
| 723 | 9997 | 0.0112 | 9639 | 0.1042 |
| 724 | 9696 | 0.011  | 9169 | 0.089  |

|     |      |        |      |        |
|-----|------|--------|------|--------|
| 725 | 9884 | 0.0171 | 9064 | 0.0998 |
| 726 | 9931 | 0.0134 | 9351 | 0.1053 |
| 727 | 9933 | 0.0154 | 9225 | 0.0984 |
| 728 | 9140 | 0.0152 | 9719 | 0.1047 |
| 729 | 9991 | 0.0148 | 9708 | 0.105  |
| 730 | 9971 | 0.0163 | 9439 | 0.1006 |
| 731 | 1428 | 0.0108 | 1404 | 0.0926 |
| 732 | 0    | n.d.   | 0    | n.d.   |
| 733 | 0    | n.d.   | 0    | n.d.   |
| 734 | 0    | n.d.   | 0    | n.d.   |
| 735 | 0    | n.d.   | 0    | n.d.   |
| 736 | 0    | n.d.   | 8312 | 0.0923 |
| 737 | 0    | n.d.   | 9661 | 0.102  |
| 738 | 0    | n.d.   | 8730 | 0.0921 |
| 739 | 0    | n.d.   | 9464 | 0.093  |
| 740 | 0    | n.d.   | 8327 | 0.0883 |
| 741 | 0    | n.d.   | 7604 | 0.1096 |
| 742 | 0    | n.d.   | 7771 | 0.1161 |
| 743 | 0    | n.d.   | 8336 | 0.1024 |
| 744 | 0    | n.d.   | 6977 | 0.0958 |
| 745 | 0    | n.d.   | 8087 | 0.1216 |
| 746 | 0    | n.d.   | 6991 | 0.0996 |
| 747 | 0    | n.d.   | 8041 | 0.1128 |
| 748 | 6349 | 0.0175 | 8302 | 0.1057 |
| 749 | 9391 | 0.0136 | 9187 | 0.1061 |
| 750 | 9751 | 0.01   | 8273 | 0.1114 |
| 751 | 8864 | 0.0128 | 9046 | 0.0976 |
| 752 | 6656 | 0.0117 | 7978 | 0.0925 |
| 753 | 7928 | 0.0118 | 7529 | 0.1059 |
| 754 | 9442 | 0.0087 | 9029 | 0.1005 |
| 755 | 9921 | 0.0143 | 9221 | 0.0975 |
| 756 | 9882 | 0.0108 | 9753 | 0.1024 |
| 757 | 9059 | 0.0161 | 8304 | 0.0977 |
| 758 | 9415 | 0.0124 | 8803 | 0.0912 |
| 759 | 9939 | 0.0179 | 9287 | 0.1013 |
| 760 | 9341 | 0.0199 | 9267 | 0.0963 |
| 761 | 9838 | 0.0157 | 9372 | 0.1108 |
| 762 | 9999 | 0.0142 | 9752 | 0.1094 |
| 763 | 9767 | 0.0156 | 9013 | 0.1087 |
| 764 | 8859 | 0.0143 | 8458 | 0.1074 |
| 765 | 9954 | 0.0164 | 9493 | 0.1098 |
| 766 | 9944 | 0.0173 | 9243 | 0.1061 |
| 767 | 9984 | 0.0134 | 8361 | 0.1007 |
| 768 | 9971 | 0.0099 | 7365 | 0.0964 |
| 769 | 9028 | 0.015  | 8365 | 0.1013 |
| 770 | 0    | n.d.   | 1945 | 0.108  |
| 771 | 0    | n.d.   | 0    | n.d.   |
| 772 | 0    | n.d.   | 0    | n.d.   |
| 773 | 0    | n.d.   | 0    | n.d.   |
| 774 | 0    | n.d.   | 0    | n.d.   |
| 775 | 6772 | 0.0148 | 6938 | 0.1184 |
| 776 | 8858 | 0.0125 | 8254 | 0.1122 |

|        |      |        |      |        |
|--------|------|--------|------|--------|
| 777    | 6995 | 0.0128 | 6677 | 0.1276 |
| 778    | 9954 | 0.0102 | 9529 | 0.114  |
| 779    | 9981 | 0.0179 | 9503 | 0.1194 |
| 780    | 8603 | 0.0161 | 7842 | 0.1093 |
| 781    | 9630 | 0.0109 | 8653 | 0.1016 |
| 782    | 9518 | 0.0107 | 9257 | 0.1073 |
| 783    | 9908 | 0.014  | 9327 | 0.1193 |
| 784    | 9966 | 0.0208 | 9122 | 0.1164 |
| 785    | 9632 | 0.0157 | 8562 | 0.12   |
| 786    | 7555 | 0.02   | 7409 | 0.1063 |
| 787    | 9877 | 0.0166 | 9197 | 0.1252 |
| 788    | 9087 | 0.0104 | 9126 | 0.1102 |
| 789    | 9940 | 0.016  | 9818 | 0.1224 |
| 790*** | 9722 | 0.0237 | 8471 | 0.1187 |
| 791*** | 9809 | 0.0245 | 9155 | 0.1307 |
| 792    | 9981 | 0.0132 | 9606 | 0.1143 |
| 793    | 8703 | 0.0156 | 7526 | 0.1266 |
| 794    | 9726 | 0.0141 | 8080 | 0.1134 |
| 795    | 9549 | 0.0136 | 9399 | 0.1064 |
| 796    | 9847 | 0.0151 | 9372 | 0.1089 |
| 797    | 9252 | 0.0137 | 8665 | 0.1182 |
| 798    | 9693 | 0.0193 | 9047 | 0.1248 |
| 799    | 8900 | 0.0178 | 7639 | 0.1215 |
| 800    | 9900 | 0.0134 | 9414 | 0.1023 |
| 801    | 2371 | 0.0095 | 8415 | 0.1071 |
| 802    | 0    | n.d.   | 9646 | 0.0901 |
| 803    | 0    | n.d.   | 9519 | 0.1049 |
| 804    | 0    | n.d.   | 3538 | 0.1078 |
| 805    | 0    | n.d.   | 0    | n.d.   |
| 806    | 0    | n.d.   | 0    | n.d.   |
| 807    | 0    | n.d.   | 0    | n.d.   |
| 808    | 0    | n.d.   | 0    | n.d.   |
| 809    | 5389 | 0.0106 | 5270 | 0.0995 |
| 810    | 1852 | 0.0179 | 1847 | 0.1036 |
| 811    | 9074 | 0.0136 | 9187 | 0.1163 |
| 812    | 9985 | 0.0171 | 9558 | 0.1131 |
| 813    | 9888 | 0.0164 | 9742 | 0.0999 |
| 814    | 9961 | 0.0134 | 9239 | 0.1151 |
| 815    | 8721 | 0.0217 | 8562 | 0.122  |
| 816    | 9793 | 0.0142 | 9028 | 0.1119 |
| 817    | 9520 | 0.0175 | 9371 | 0.0948 |
| 818    | 9130 | 0.0109 | 9399 | 0.1169 |
| 819    | 8828 | 0.0165 | 8586 | 0.1026 |
| 820    | 9026 | 0.0144 | 8727 | 0.1072 |
| 821    | 9819 | 0.019  | 9285 | 0.1195 |
| 822    | 9418 | 0.0155 | 9333 | 0.1125 |
| 823    | 9713 | 0.0143 | 9170 | 0.0972 |
| 824    | 9618 | 0.0146 | 9034 | 0.1066 |
| 825    | 9657 | 0.0118 | 8737 | 0.121  |
| 826    | 9837 | 0.0122 | 9383 | 0.1222 |
| 827    | 9603 | 0.0145 | 9374 | 0.1388 |
| 828    | 9434 | 0.0125 | 9136 | 0.1103 |



|     |      |        |      |        |
|-----|------|--------|------|--------|
| 829 | 2847 | 0.0071 | 2482 | 0.1076 |
| 830 | 7849 | 0.0165 | 7647 | 0.101  |
| 831 | 9353 | 0.0124 | 7754 | 0.1036 |
| 832 | 9426 | 0.0193 | 9114 | 0.1343 |
| 833 | 9301 | 0.0144 | 6971 | 0.1033 |
| 834 | 3476 | 0.0103 | 3451 | 0.1224 |
| 835 | 0    | n.d.   | 0    | n.d.   |
| 836 | 0    | n.d.   | 0    | n.d.   |
| 837 | 0    | n.d.   | 0    | n.d.   |
| 838 | 0    | n.d.   | 0    | n.d.   |
| 839 | 6462 | 0.0092 | 5975 | 0.1109 |
| 840 | 9966 | 0.0128 | 9334 | 0.1255 |
| 841 | 4238 | 0.0109 | 8941 | 0.1126 |
| 842 | 9150 | 0.0108 | 5388 | 0.105  |
| 843 | 9929 | 0.0149 | 414  | 0.11   |
| 844 | 9952 | 0.0179 | 9357 | 0.1243 |
| 845 | 9951 | 0.0123 | 9688 | 0.0991 |
| 846 | 9359 | 0.0205 | 7756 | 0.142  |
| 847 | 9986 | 0.0145 | 9568 | 0.1161 |
| 848 | 9966 | 0.0182 | 8547 | 0.1071 |
| 849 | 9931 | 0.022  | 9551 | 0.111  |
| 850 | 9709 | 0.0131 | 8758 | 0.1099 |
| 851 | 9088 | 0.0157 | 8673 | 0.1045 |
| 852 | 9944 | 0.018  | 8511 | 0.1018 |
| 853 | 9969 | 0.0093 | 9683 | 0.0934 |
| 854 | 9998 | 0.0099 | 9777 | 0.0934 |
| 855 | 9822 | 0.0099 | 9819 | 0.1012 |
| 856 | 9975 | 0.0156 | 9573 | 0.111  |
| 857 | 9998 | 0.0089 | 9264 | 0.1107 |
| 858 | 4992 | 0.0173 | 4895 | 0.1038 |
| 859 | 0    | n.d.   | 0    | n.d.   |
| 860 | 0    | n.d.   | 0    | n.d.   |
| 861 | 0    | n.d.   | 0    | n.d.   |
| 862 | 0    | n.d.   | 0    | n.d.   |
| 863 | 0    | n.d.   | 0    | n.d.   |
| 864 | 0    | n.d.   | 0    | n.d.   |
| 865 | 0    | n.d.   | 0    | n.d.   |
| 866 | 0    | n.d.   | 0    | n.d.   |
| 867 | 0    | n.d.   | 0    | n.d.   |
| 868 | 0    | n.d.   | 0    | n.d.   |
| 869 | 0    | n.d.   | 0    | n.d.   |

The window numbers refer to location in the ZAL2 assembly and are non-overlapping.

n.d. = no data

\*Windows with  $K2P \leq 0.0007$  outside inversion

\*\*Window that spans ZAL2 p-arm inversion breakpoint

\*\*\*Windows with a  $K2P \geq 0.0225$  inside the inversion

\*\*\*\*Windows with a  $K2P \leq 0.005$  inside the inversion
