# Supplementary material
Source: PubMed Central journal article supplement (PMC3113616)
Supplement: supp_esr043_SupplementaryTable6n.pdf [file supp_esr043_SupplementaryTable6n.pdf]

Supplementary Table 6. ZAL2 versus ZAL2m and ZAL2 versus zebra finch divergence within the local region of low divergence inside the inversion.

| Window (1 kb) | ZAL2-ZAL2m<br>aligned sites | ZAL2-ZAL2m<br>K2P | ZAL2-zebra finch<br>aligned sites | ZAL2-zebra finch<br>K2P |
|---------------|-----------------------------|-------------------|-----------------------------------|-------------------------|
| 5999          | 871                         | 0.007             | 976                               | 0.0986                  |
| 6000          | 782                         | 0.0052            | 771                               | 0.1021                  |
| 6001          | 541                         | 0.0075            | 464                               | 0.1056                  |
| 6002          | 1000                        | 0.004             | 927                               | 0.1178                  |
| 6003          | 621                         | 0.0016            | 605                               | 0.09                    |
| 6004          | 852                         | 0.0035            | 837                               | 0.1103                  |
| 6005          | 1000                        | 0.002             | 995                               | 0.0676                  |
| 6006          | 920                         | 0.0033            | 909                               | 0.1166                  |
| 6007          | 915                         | 0.0022            | 912                               | 0.154                   |
| 6008          | 783                         | 0.0039            | 748                               | 0.0998                  |
| 6009          | 920                         | 0.0078            | 903                               | 0.1131                  |
| 6010          | 163                         | 0.0062            | 138                               | 0.0657                  |
| 6011          | 466                         | 0.0022            | 466                               | 0.1058                  |
| 6012          | 973                         | 0.001             | 834                               | 0.1351                  |
| 6013          | 716                         | 0.0014            | 442                               | 0.13                    |
| 6014          | 1000                        | 0.002             | 996                               | 0.0821                  |
| 6015          | 843                         | 0.0036            | 799                               | 0.1148                  |
| 6016          | 781                         | 0.0013            | 664                               | 0.0967                  |
| 6017          | 565                         | 0.0036            | 499                               | 0.095                   |
| 6018          | 913                         | 0.0022            | 893                               | 0.1181                  |

The window numbers refer to location in the ZAL2 assembly and are non-overlapping.
